# Supplementary material for: Conservation of peripheral nervous system formation mechanisms in divergent ascidian embryos
Source: eLife journal article supplement (doi:10.7554/elife.59157), 2020-11-16

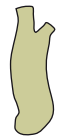

*Ciona intestinalis*

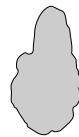

*Phallusia mammillata*

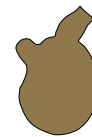

*Molgula appendiculata*

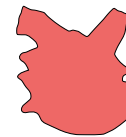

*Halocynthia roretzi*

*Msx*

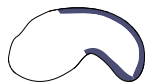

VDML (PNS)

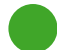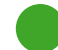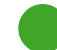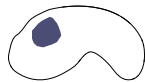

Sensory vesicle (CNS)

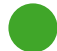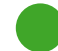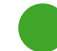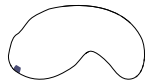

Palps region (PNS)

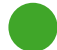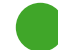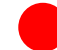

*Ascl.b*

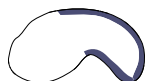

VDML (PNS)

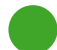

*Ascl.b $\alpha$*

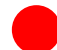

*Ascl.b $\beta$*

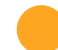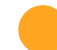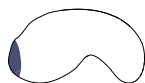

Palps region (PNS)

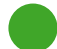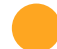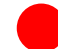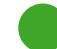

*Klf1/2/4*

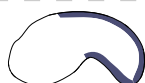

VDML (PNS)

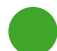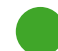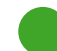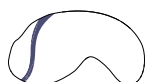

Neurogenic 'ring' (PNS)

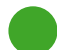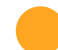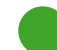

*Nkxtun3*

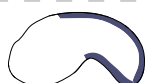

VDML (PNS)

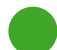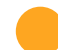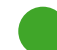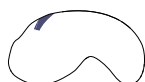

ATENs region (PNS)

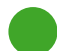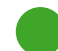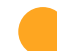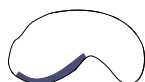

Ventral trunk epidermis

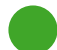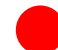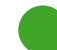

*Tox*

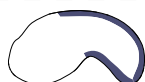

VDML (PNS)

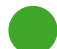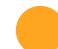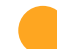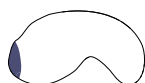

Palps region (PNS)

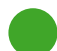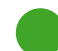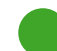

*Dlx.c*

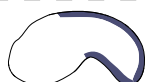

VDML (PNS)

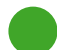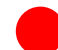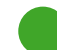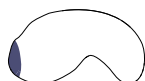

Palps region (PNS)

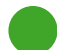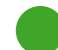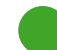

Supplement: supp [file elife-59157-supp-v1.zip › elife_poa_e59157_Figure_8_figure_supplement_3.pdf]
