# Supplementary material for: Conservation of peripheral nervous system formation mechanisms in divergent ascidian embryos
Source: PubMed Central journal article supplement (PMC7710358; doi:10.7554/elife.59157), 2020-11-16

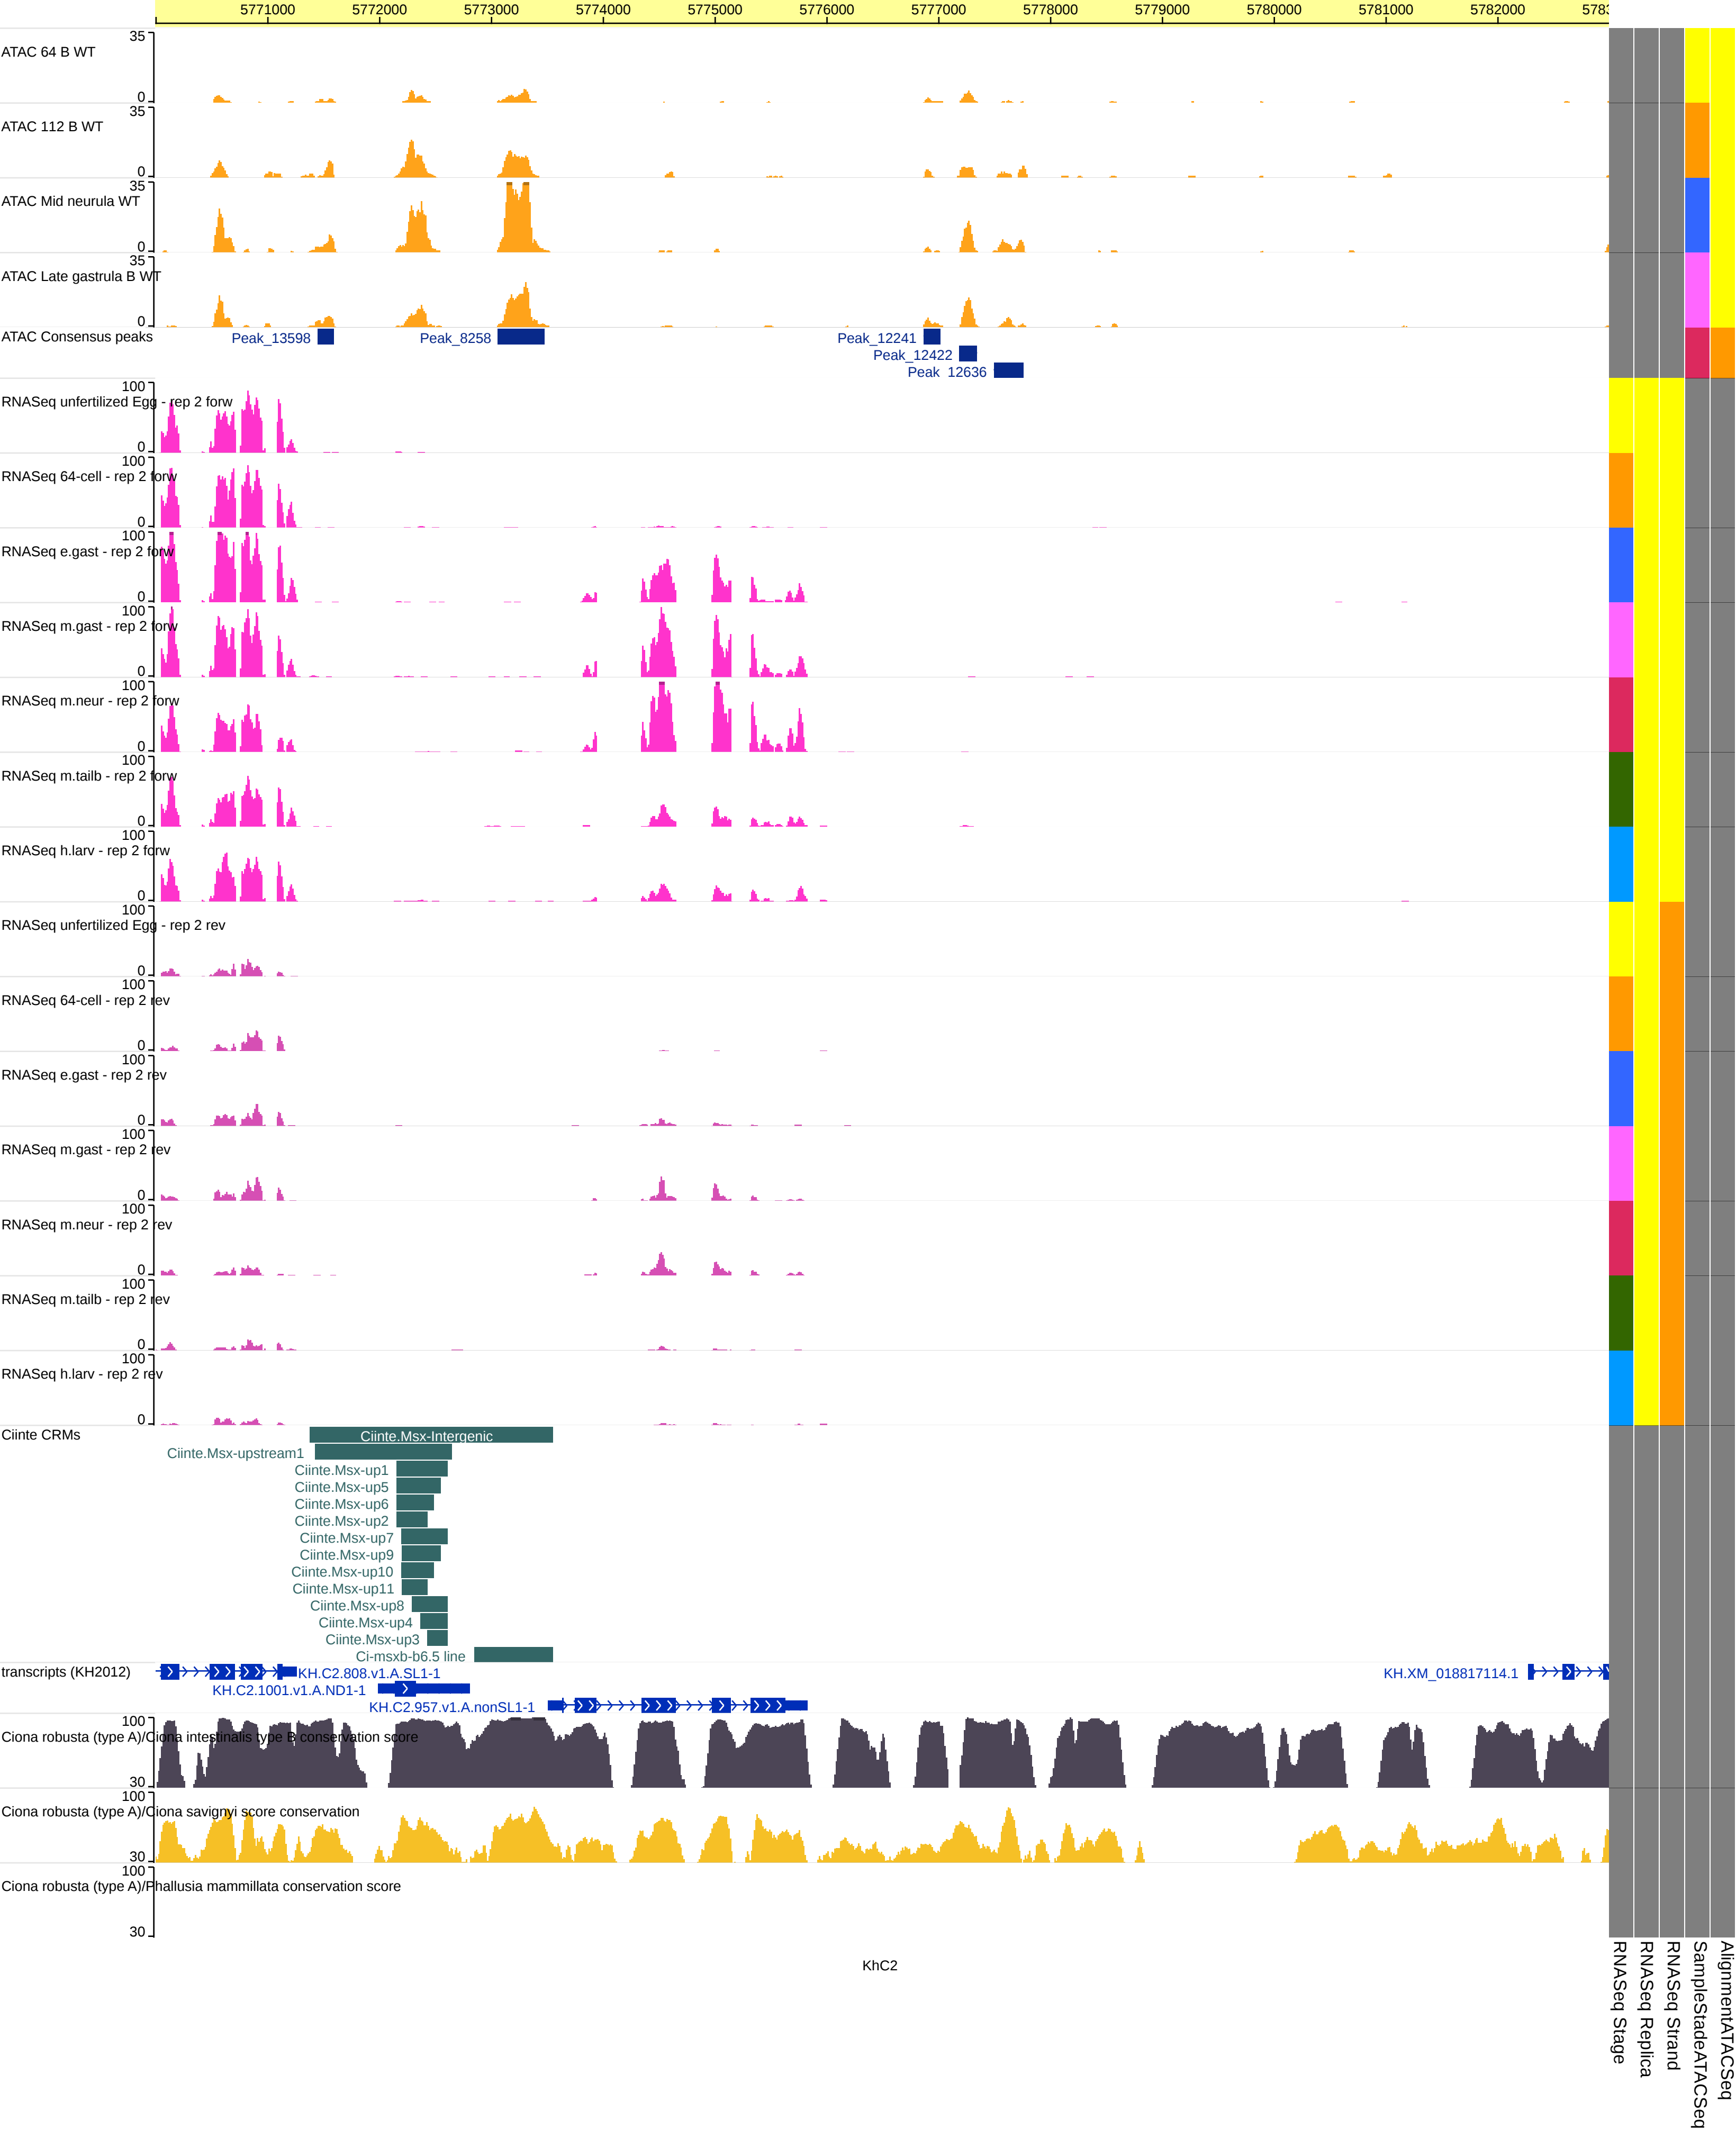

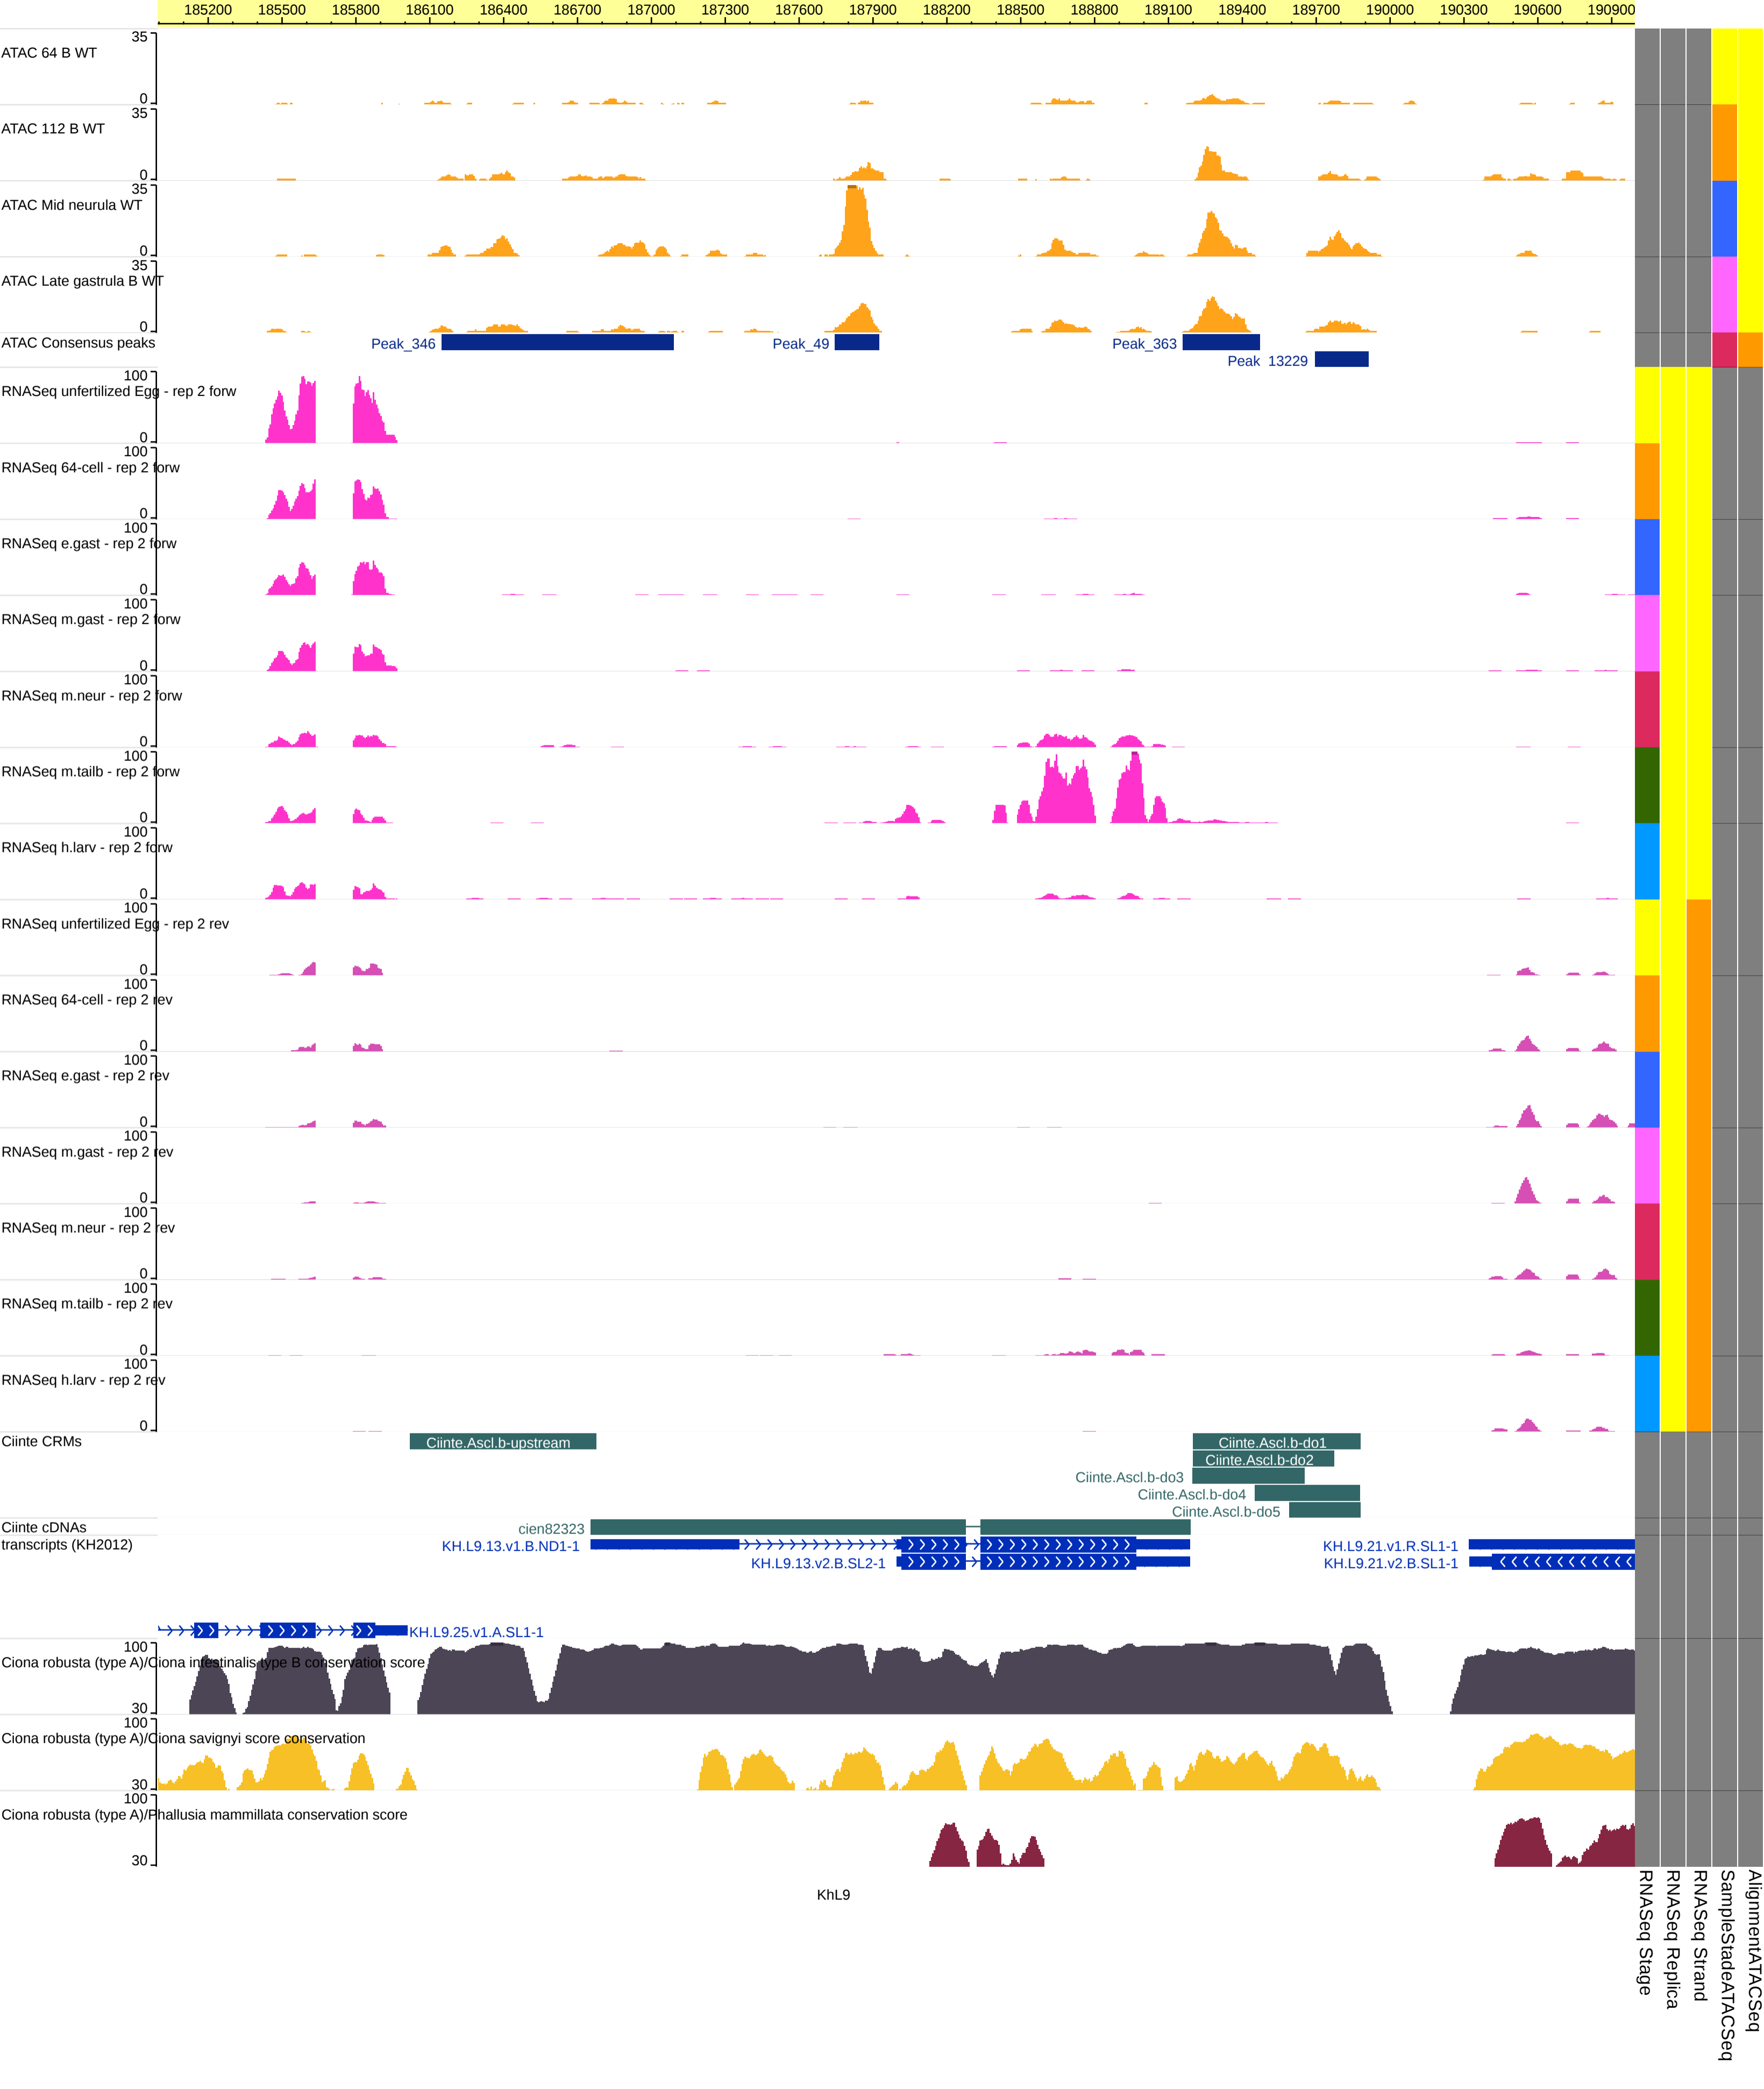

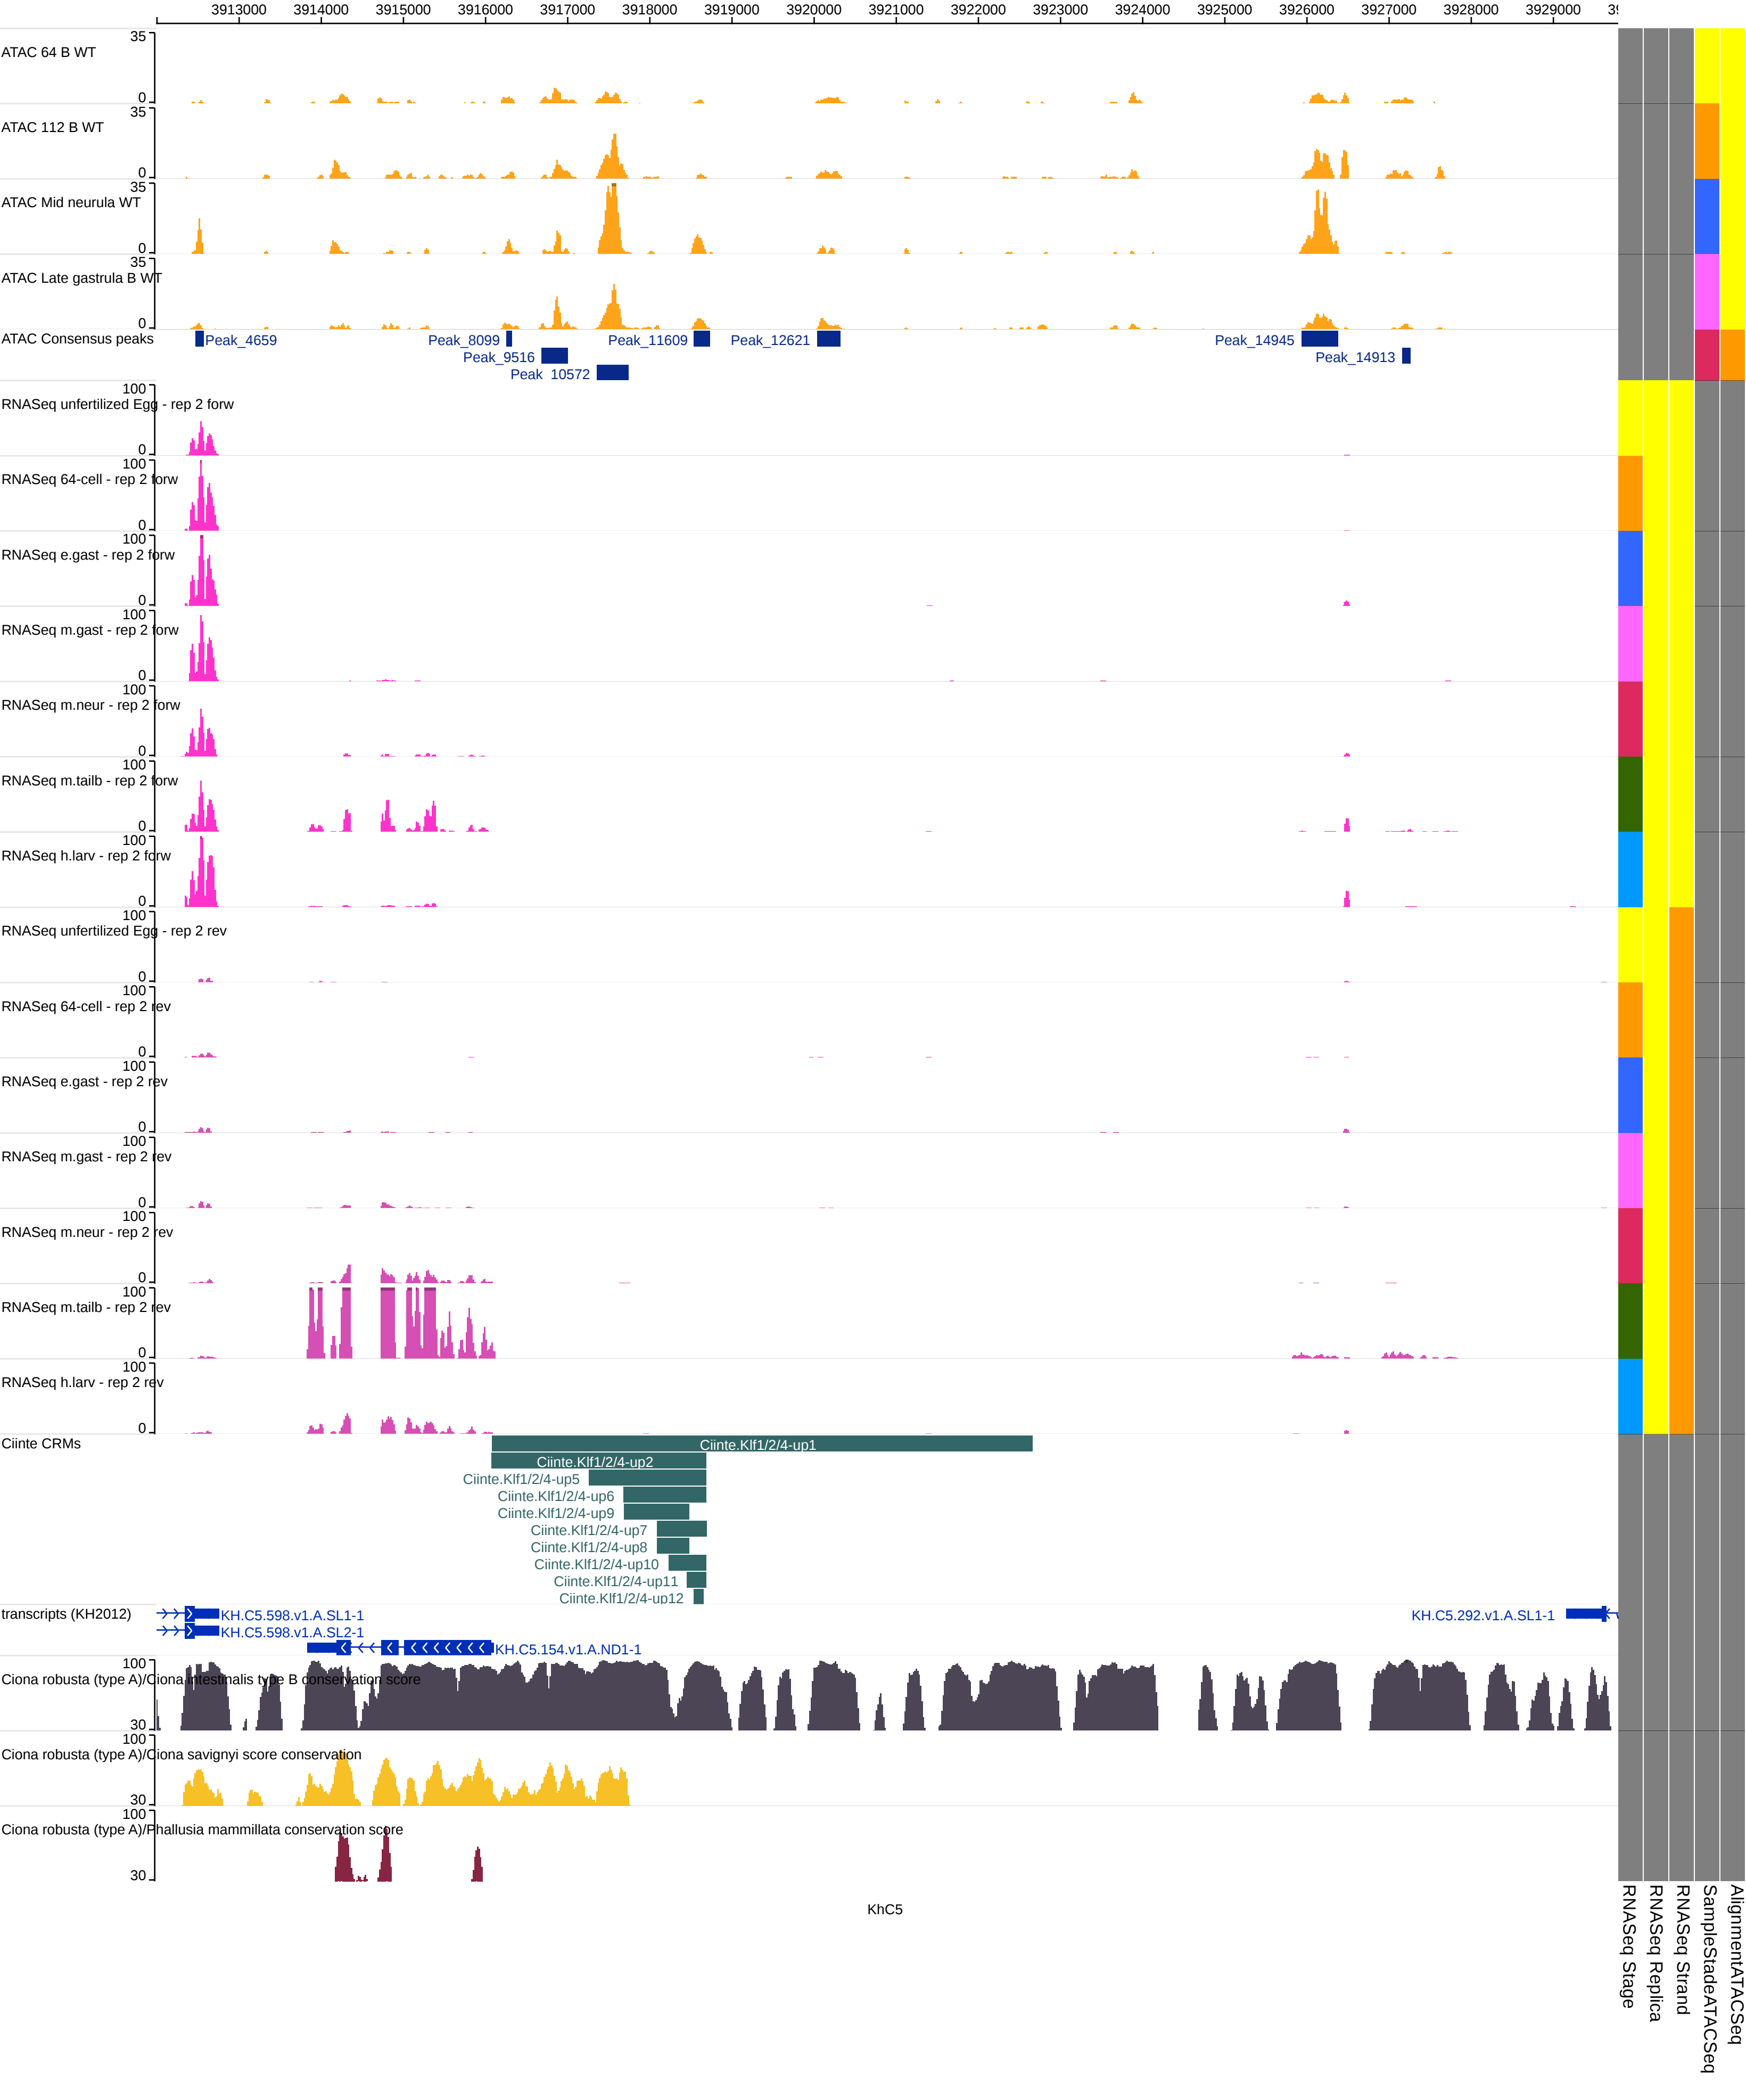

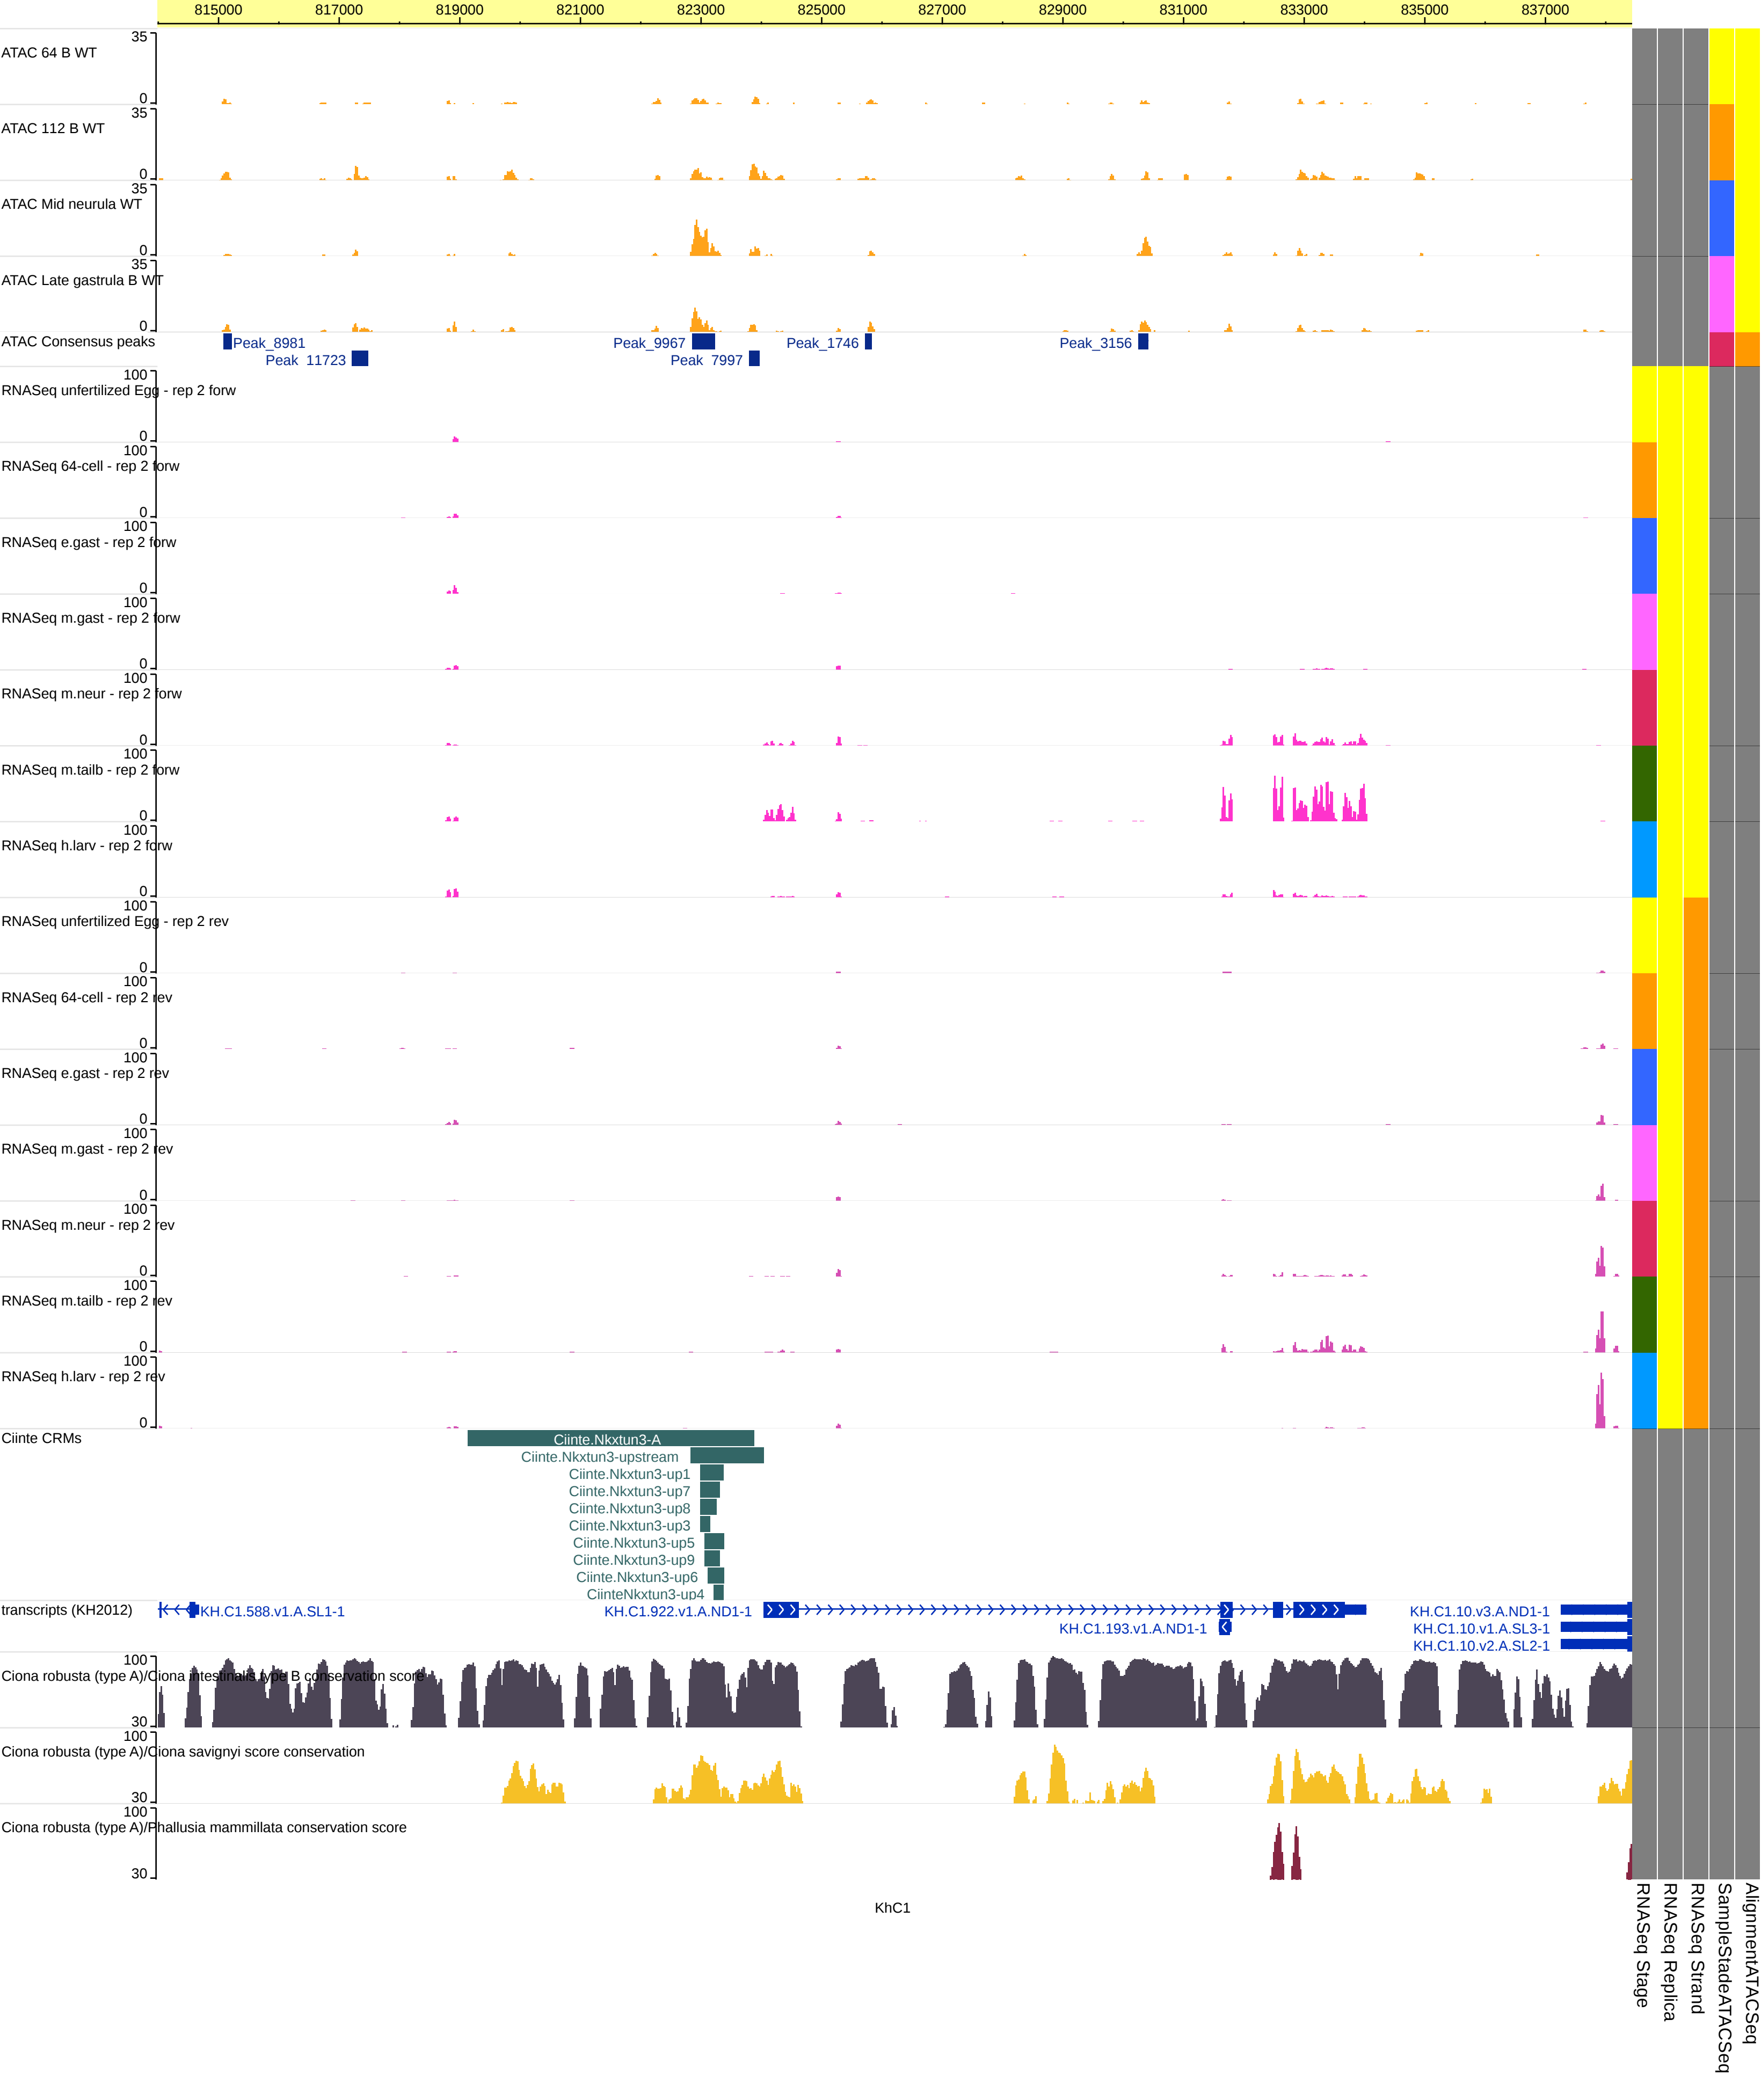

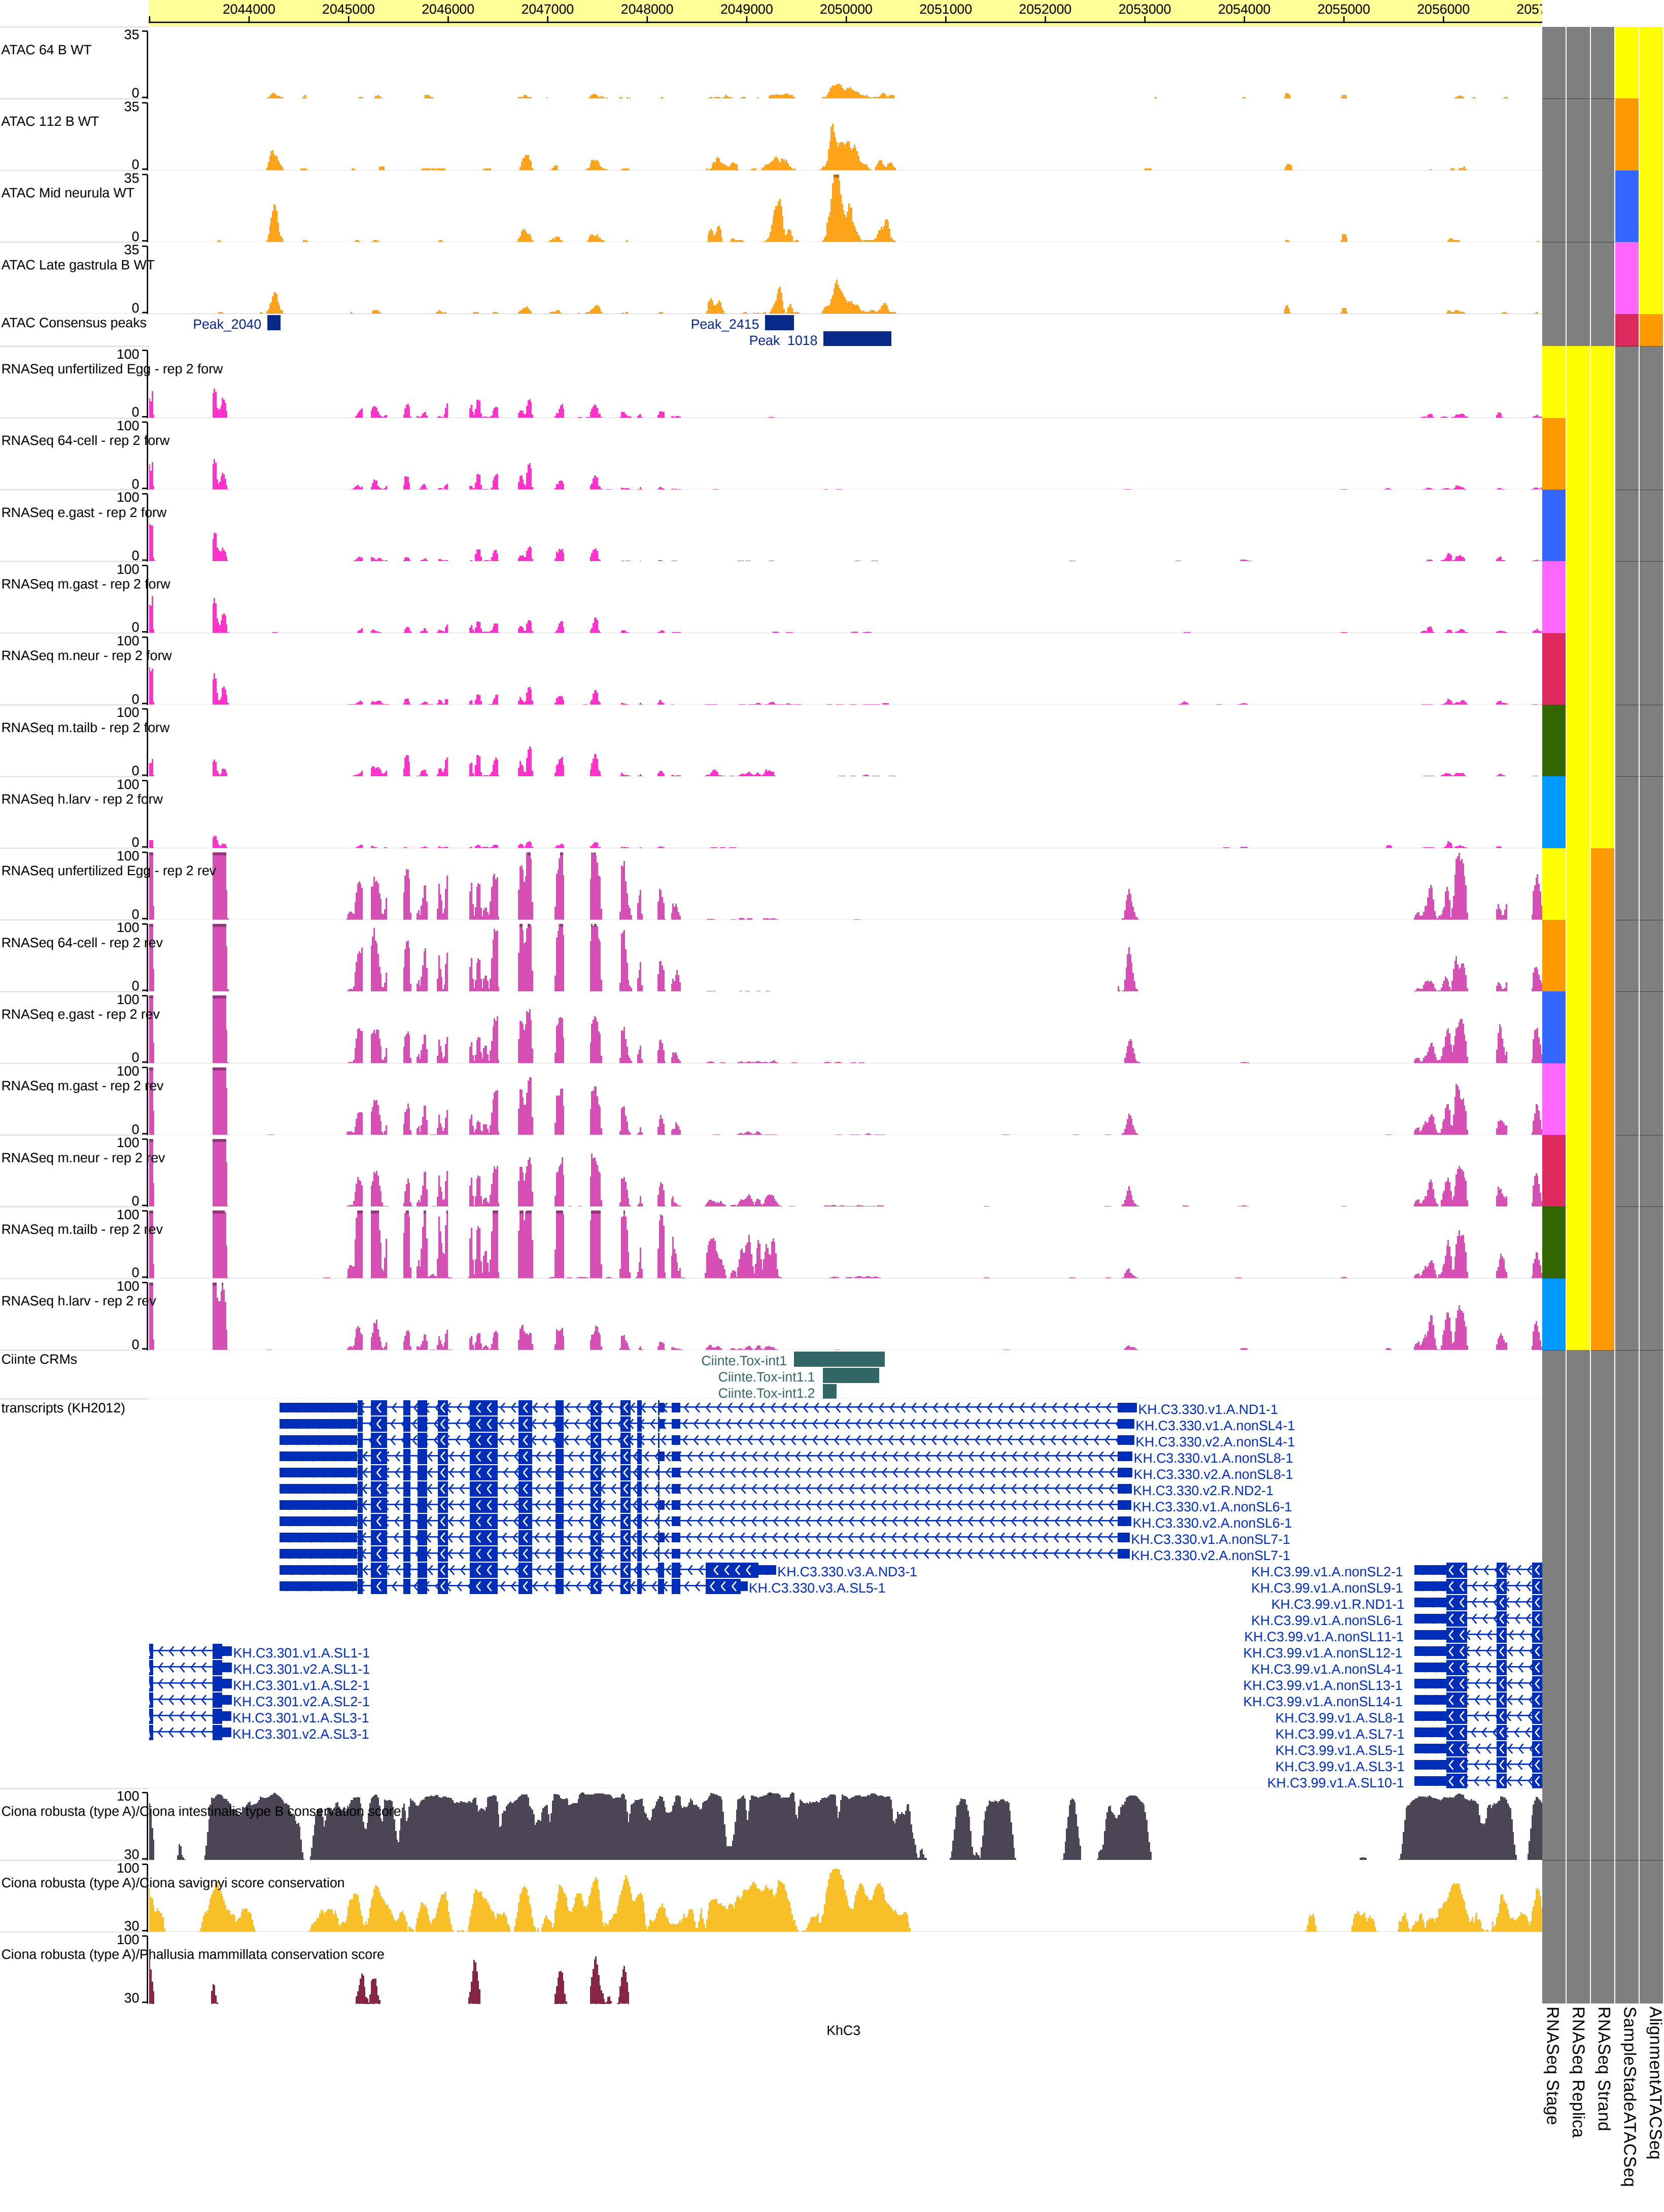

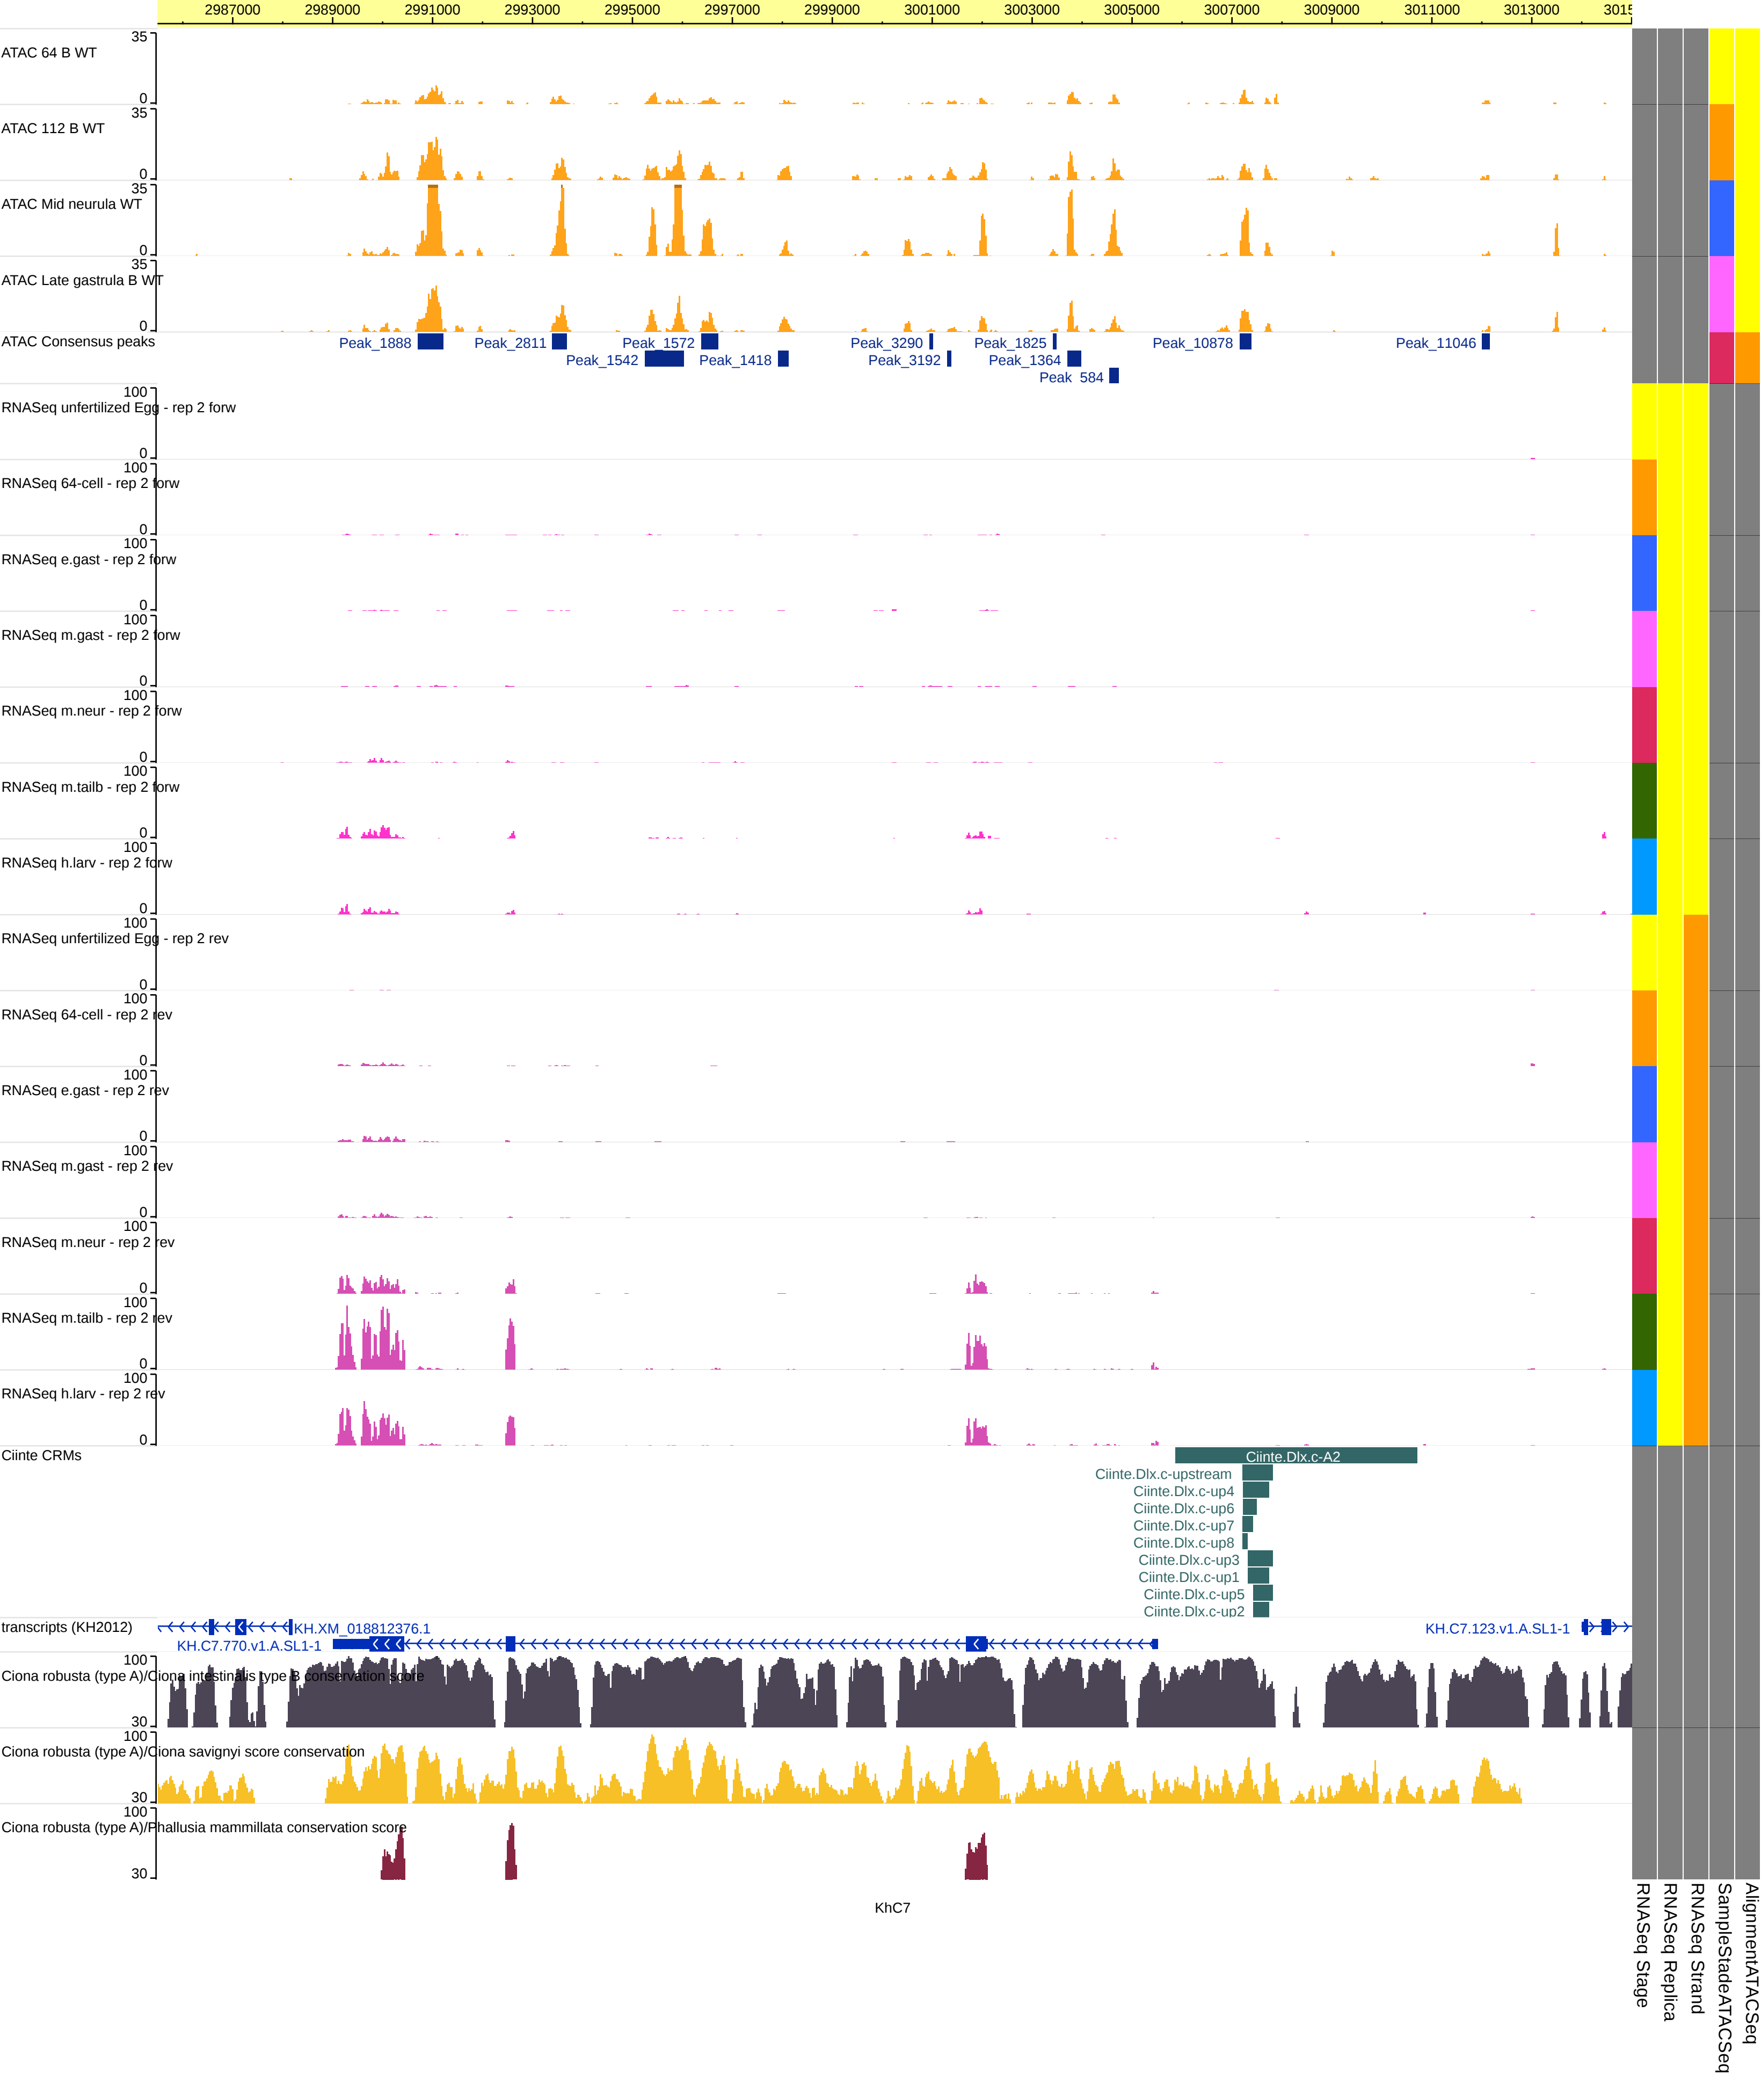

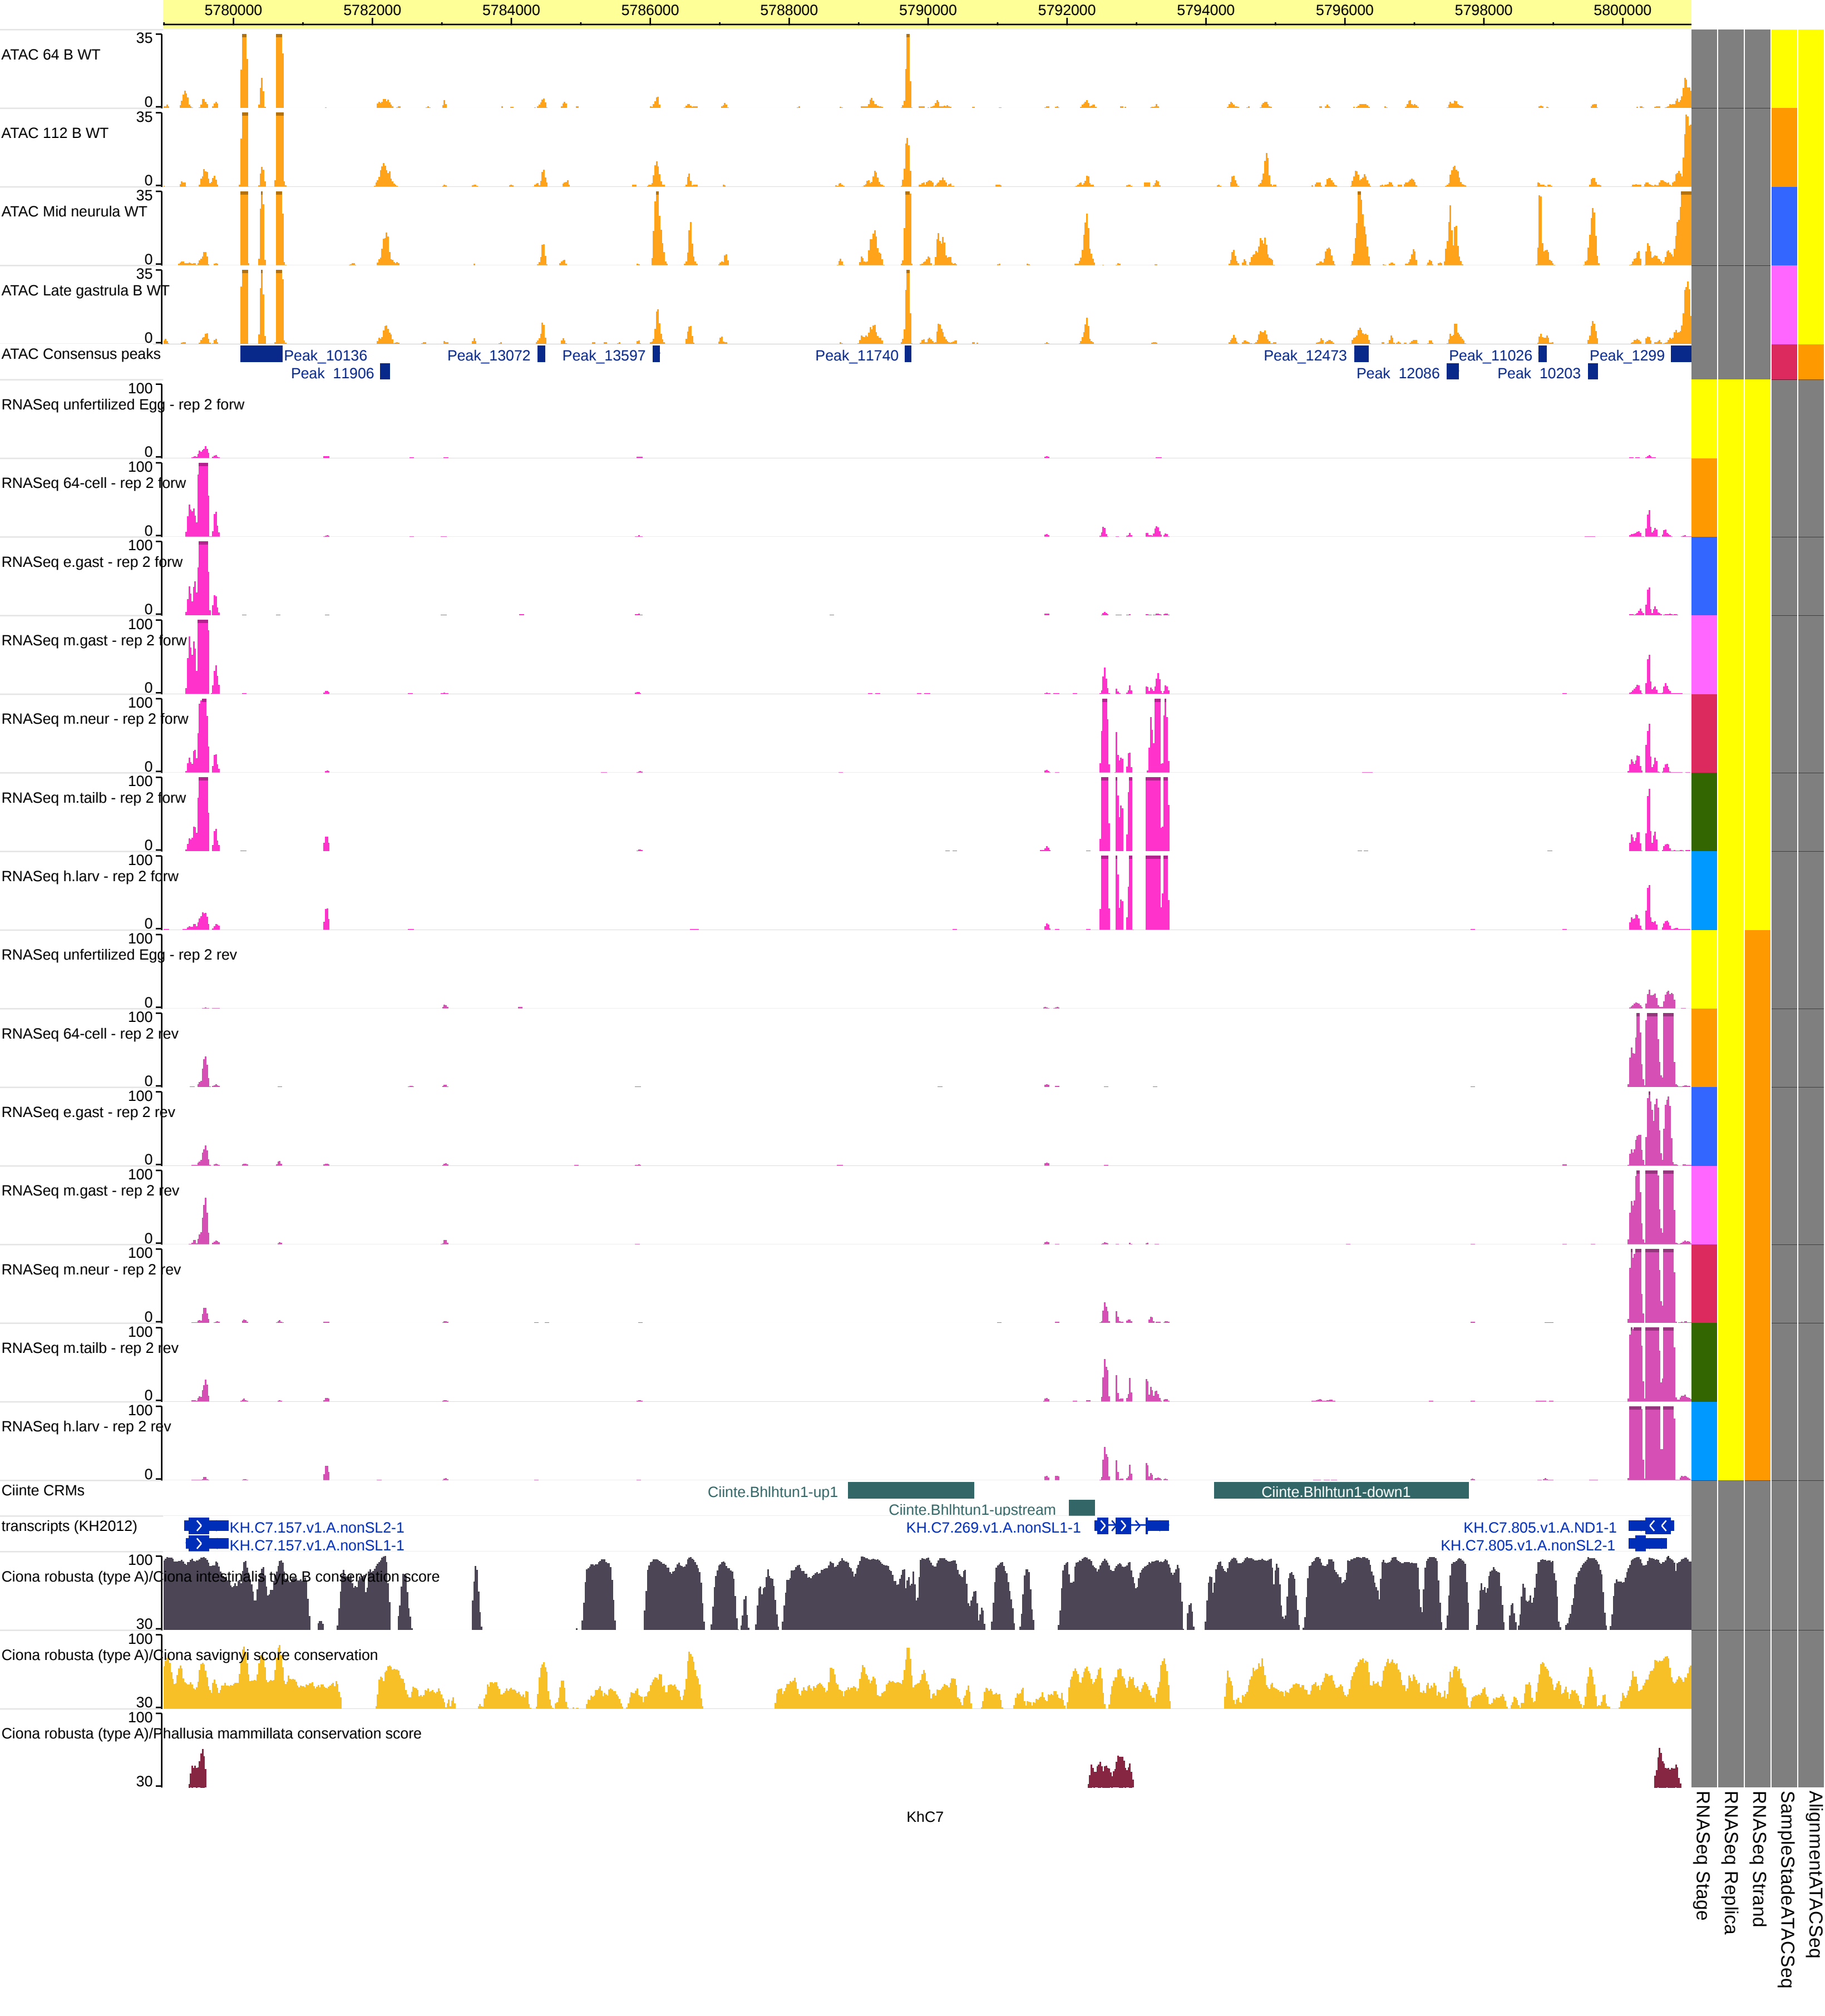

Supplement: elife-59157-supp2.pdf [file elife-59157-supp2.pdf]
