# Supplementary material for: Conservation of peripheral nervous system formation mechanisms in divergent ascidian embryos
Source: PubMed Central journal article supplement (PMC7710358; doi:10.7554/elife.59157), 2020-11-16

S143

27600 28000 28400 28800 29200 29600 30000 30400 30800 31200 31600 32000 32400 32800 33200 33600 34000 34400 34800 35200 35600 36000

Phfumi CRM

Phfumi.Msx-up

Phfumi cDNA

Msx

transcripts

[Phfumi.CG.MTP2014.S143.g01156.01.t](#)[Phfumi.CG.MTP2014.S143.g01159.01.t](#)

&gt;&gt;

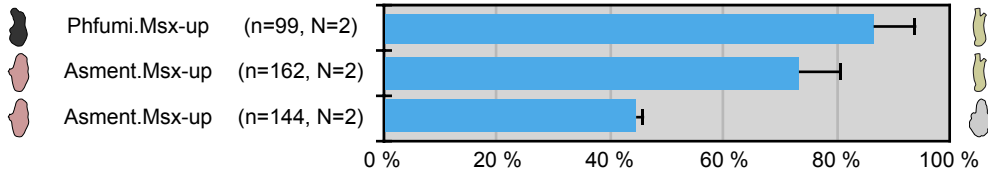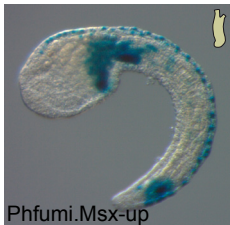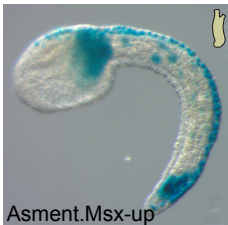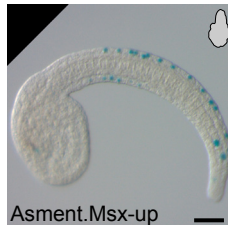

Supplement: elife-59157-supp6.pdf [file elife-59157-supp6.pdf]
