# Supplementary material for: Conservation of peripheral nervous system formation mechanisms in divergent ascidian embryos
Source: eLife journal article supplement (doi:10.7554/elife.59157), 2020-11-16
Supplement: supp [file elife-59157-supp-v1.zip]

Archive with 29 entries (29 files):
- elife_poa_e59157_Figure_1_figure_supplement_1.pdf
- elife_poa_e59157_Figure_1_figure_supplement_2.pdf
- elife_poa_e59157_Figure_2_figure_supplement_1.pdf
- elife_poa_e59157_Figure_3_figure_supplement_1.pdf
- elife_poa_e59157_Figure_3_figure_supplement_2.pdf
- elife_poa_e59157_Figure_3_figure_supplement_3.pdf
- elife_poa_e59157_Figure_3_figure_supplement_4.pdf
- elife_poa_e59157_Figure_4_figure_supplement_1.pdf
- elife_poa_e59157_Figure_5_figure_supplement_1.pdf
- elife_poa_e59157_Figure_5_figure_supplement_2.pdf
- elife_poa_e59157_Figure_5_figure_supplement_3.pdf
- elife_poa_e59157_Figure_5_figure_supplement_4.pdf
- elife_poa_e59157_Figure_6_figure_supplement_1.pdf
- elife_poa_e59157_Figure_6_figure_supplement_2.pdf
- elife_poa_e59157_Figure_8_figure_supplement_1.pdf
- elife_poa_e59157_Figure_8_figure_supplement_2.pdf
- elife_poa_e59157_Figure_8_figure_supplement_3.pdf
- elife_poa_e59157_Figure_9_figure_supplement_1.pdf
- elife_poa_e59157_Figure_9_figure_supplement_2.pdf
- elife_poa_e59157_Supplementary_file_1.xlsx
- elife_poa_e59157_Supplementary_file_2.pdf
- elife_poa_e59157_Supplementary_file_3.pdf
- elife_poa_e59157_Supplementary_file_4.pdf
- elife_poa_e59157_Supplementary_file_5.pdf
- elife_poa_e59157_Supplementary_file_6.pdf
- elife_poa_e59157_Supplementary_file_7.pdf
- elife_poa_e59157_Supplementary_file_8.xlsx
- elife_poa_e59157_Supplementary_file_9.docx
- elife_poa_e59157_Transparent_Reporting_File.pdf
