# Supplementary material for: Conservation of peripheral nervous system formation mechanisms in divergent ascidian embryos
Source: eLife journal article supplement (doi:10.7554/elife.59157), 2020-11-16
Supplement: supp [file elife-59157-supp-v1.zip › elife_poa_e59157_Figure_1_figure_supplement_1.pdf]

A

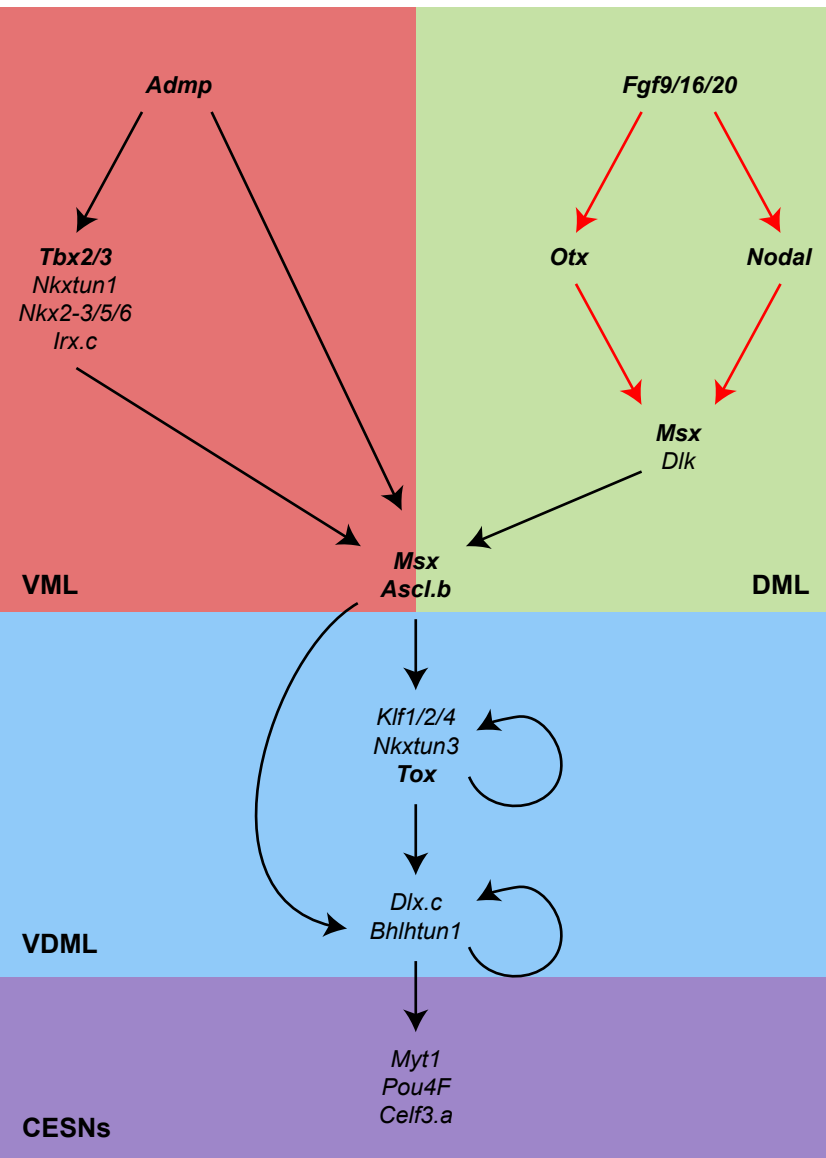

B

| ID             | Name       | Species                 | Class                             | Family                                    | TF/Pathway |
|----------------|------------|-------------------------|-----------------------------------|-------------------------------------------|------------|
| E-box          | CANNTG     |                         |                                   |                                           | Ascl.b     |
| BRE            | GRCGNC     |                         |                                   |                                           | Bmp        |
| SBE            | AGAC       |                         |                                   |                                           | Bmp        |
| AC156_6_1-6-1  | Dlx.c      | Ciona intestinalis      | Helix-Turn-Helix                  | Homeo                                     | Dlx.c      |
| MA0879.1       | Dlx1       | Mus musculus            | Homeo domain factors              | NK-related factors                        | Dlx.c      |
| MA0881.1       | Dlx4       | Mus musculus            | Homeo domain factors              | NK-related factors                        | Dlx.c      |
| MA0882.1       | DLX6       | Homo sapiens            | Homeo domain factors              | NK-related factors                        | Dlx.c      |
| PH0020.1       | Dlx1       | Mus musculus            | Helix-Turn-Helix                  | Homeo                                     | Dlx.c      |
| PH0023.1       | Dlx4       | Mus musculus            | Helix-Turn-Helix                  | Homeo                                     | Dlx.c      |
| MA0210.1       | ara        | Drosophila melanogaster | Homeo domain factors              | TALE-type homeo domain factors            | lrx.c      |
| MA0217.1       | caup       | Drosophila melanogaster | Homeo domain factors              | TALE-type homeo domain factors            | lrx.c      |
| MA0233.1       | mirr       | Drosophila melanogaster | Homeo domain factors              | TALE-type homeo domain factors            | lrx.c      |
| PH0082.1       | lrx2       | Mus musculus            | Helix-Turn-Helix                  | Homeo                                     | lrx.c      |
| PH0085.1       | lrx4       | Mus musculus            | Helix-Turn-Helix                  | Homeo                                     | lrx.c      |
| PH0086.1       | lrx5       | Mus musculus            | Helix-Turn-Helix                  | Homeo                                     | lrx.c      |
| MA0039.1       | Klf4       | Mus musculus            | C2H2 zinc finger factors          | Three-zinc finger Kruppel-related factors | Klf1/2/4   |
| MA0039.2       | Klf4       | Mus musculus            | C2H2 zinc finger factors          | Three-zinc finger Kruppel-related factors | Klf1/2/4   |
| MA0039.3       | KLF4       | Homo sapiens            | C2H2 zinc finger factors          | Three-zinc finger Kruppel-related factors | Klf1/2/4   |
| MA0039.4       | KLF4       | Homo sapiens            | C2H2 zinc finger factors          | Three-zinc finger Kruppel-related factors | Klf1/2/4   |
| MA0493.1       | Klf1       | Mus musculus            | C2H2 zinc finger factors          | Three-zinc finger Kruppel-related factors | Klf1/2/4   |
| MA1515.1       | KLF2       | Homo sapiens            | C2H2 zinc finger factors          | Three-zinc finger Kruppel-related factors | Klf1/2/4   |
| AC016B_6_1-6-1 | Msx        | Ciona intestinalis      | Helix-Turn-Helix                  | Homeo                                     | Msx        |
| MA0666.1       | MSX1       | Homo sapiens            | Homeo domain factors              | NK-related factors                        | Msx        |
| MA0708.1       | MSX2       | Homo sapiens            | Homeo domain factors              | NK-related factors                        | Msx        |
| MA0709.1       | Msx3       | Mus musculus            | Homeo domain factors              | NK-related factors                        | Msx        |
| PH0106.1       | Msx1       | Mus musculus            | Helix-Turn-Helix                  | Homeo                                     | Msx        |
| PH0107.1       | Msx2       | Mus musculus            | Helix-Turn-Helix                  | Homeo                                     | Msx        |
| PH0108.1       | Msx3       | Mus musculus            | Helix-Turn-Helix                  | Homeo                                     | Msx        |
| AC175_6_1-6-1  | Nkx2-3/5/6 | Ciona intestinalis      | Helix-Turn-Helix                  | Homeo                                     | Nkx2-3/5/6 |
| MA0063.1       | Nkx2-5     | Mus musculus            | Homeo domain factors              | NK-related factors                        | Nkx2-3/5/6 |
| MA0063.2       | NKX2-5     | Homo sapiens            | Homeo domain factors              | NK-related factors                        | Nkx2-3/5/6 |
| MA0247.1       | tin        | Drosophila melanogaster | Homeo domain factors              | Homeo                                     | Nkx2-3/5/6 |
| MA0247.2       | tin        | Drosophila melanogaster | Homeo domain factors              |                                           | Nkx2-3/5/6 |
| MA0672.1       | NKX2-3     | Homo sapiens            | Homeo domain factors              | NK-related factors                        | Nkx2-3/5/6 |
| MA1445.1       | ceh-28     | Caenorhabditis elegans  | Homeo domain factors              | NK-related factors                        | Nkx2-3/5/6 |
| PH0112.1       | Nkx2-3     | Mus musculus            | Helix-Turn-Helix                  | Homeo                                     | Nkx2-3/5/6 |
| PH0114.1       | Nkx2-5     | Mus musculus            | Helix-Turn-Helix                  | Homeo                                     | Nkx2-3/5/6 |
| PH0115.1       | Nkx2-6     | Mus musculus            | Helix-Turn-Helix                  | Homeo                                     | Nkx2-3/5/6 |
| AC172_6_1-6-1  | Nkx.tun1   | Ciona intestinalis      | Helix-Turn-Helix                  | Homeo                                     | Nkxtun1    |
| AC042_3_1-6-1  | Nkx.tun3   | Ciona intestinalis      | Helix-Turn-Helix                  | Homeo                                     | Nkxtun3    |
| MA0175.1       | lms        | Drosophila melanogaster | Homeo domain factors              |                                           | Nkxtun3    |
| MA0635.1       | BARHL2     | Homo sapiens            | Homeo domain factors              | NK-related factors                        | Nkxtun3    |
| MA0877.1       | Barhl1     | Mus musculus            | Homeo domain factors              | NK-related factors                        | Nkxtun3    |
| MA0877.2       | BARHL1     | Homo sapiens            | Homeo domain factors              | NK-related factors                        | Nkxtun3    |
| PH0005.1       | Barhl1     | Mus musculus            | Helix-Turn-Helix                  | Homeo                                     | Nkxtun3    |
| PH0006.1       | Barhl2     | Mus musculus            | Helix-Turn-Helix                  | Homeo                                     | Nkxtun3    |
| MA0085.1       | Su(H)      | Drosophila melanogaster |                                   |                                           | Notch      |
| MA1116.1       | RBPJ       | Homo sapiens            | Rel homology region (RHR) factors | CSL-related factors                       | Notch      |
| AC006_5_1-6-1  | Tbx2/3     | Ciona intestinalis      | T-Box factors                     | TBX2-related factors                      | Tbx2/3     |
| MA0688.1       | TBX2       | Homo sapiens            | T-Box factors                     | TBX2-related factors                      | Tbx2/3     |
| MA1566.1       | TBX3       | Homo sapiens            | T-Box factors                     | TBX2-related factors                      | Tbx2/3     |
