# Supplementary material for: Conservation of peripheral nervous system formation mechanisms in divergent ascidian embryos
Source: eLife journal article supplement (doi:10.7554/elife.59157), 2020-11-16

## Ciinte.Msx-up10

[illegible]

### Putative ventral regulators:

AGAC Smad Binding Element (AGAC)  
Bmp Responsive Element (GRCGNC)  
Irx.c  
Tbx2/3

### Putative dorsal regulator:

 Msx

# B

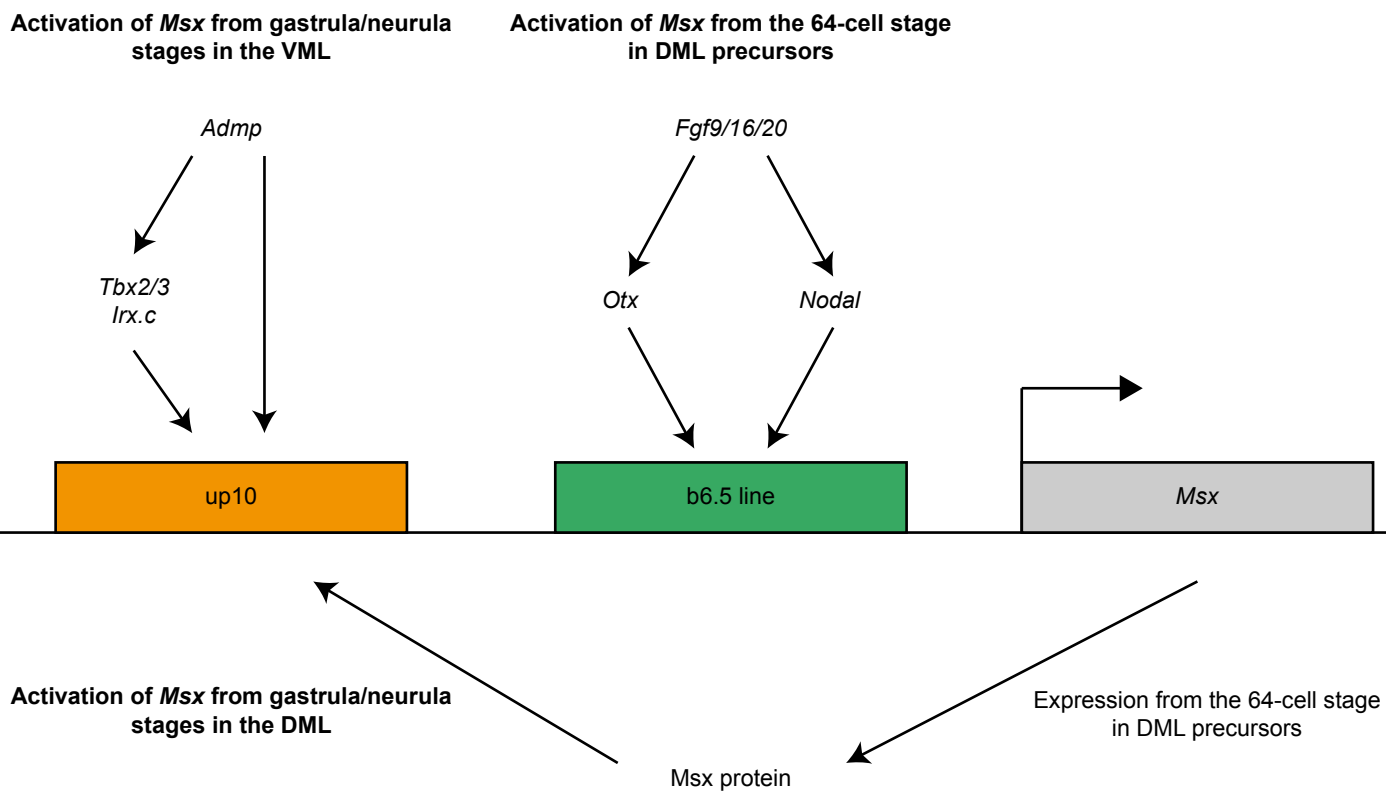

Supplement: supp [file elife-59157-supp-v1.zip › elife_poa_e59157_Figure_1_figure_supplement_2.pdf]
