# Supplementary material for: Conservation of peripheral nervous system formation mechanisms in divergent ascidian embryos
Source: eLife journal article supplement (doi:10.7554/elife.59157), 2020-11-16
Supplement: supp [file elife-59157-supp-v1.zip › elife_poa_e59157_Figure_2_figure_supplement_1.pdf]

Ciinte.Ascl.b-do2

| Region important for VML expression |                                                                                                                                       |
|-------------------------------------|---------------------------------------------------------------------------------------------------------------------------------------|
| Ciinte                              | TTGTTTGCTTTGCTTGGGCATTATCACGTCACCTATGCCCATCACTGGCACACGCCATTTG<br>                        :           :                                |
| Cisavi                              | TTGTTTGCTTTGCTTGGCCATTATCGCGTCA-----TAAGCGCACACGCCATTTG                                                                               |
| Ciinte                              | TGACGTAACAAAGCGAAGACCTTTACC GCGATAATCGCTTGGGCGTCTACGTAATAATGG<br>        :         : :             :           :         :            |
| Cisavi                              | TGACCTCACAATAAG-----GATAATCGGTTGGCGTCTTACGCAATAAT--                                                                                   |
| Ciinte                              | TTTCGCGCGATCATTCGAATTATTTACAAG-----TGTGATTGTGACGTCACCTTATCA<br>        :         :         : :     :           :         : :     :    |
| Cisavi                              | -----CGCGA-----AAAATTATTCGCGAAATTTTGCTCCGATTGTGATGTCACAAGTTC                                                                          |
| Ciinte                              | TACGCGATCGATTGATTGTAACCTTCATTATG-ACGTCACAAGGTGGCAGGTGGAATTTCG<br>:     :       :           :     :     :     :     :     :            |
| Cisavi                              | C-CGGATCCATTC-----TTACGTCAAATGCGCTTTACGACGGAGCAGGTGGAATTTCG                                                                           |
| Ciinte                              | AGAACTTGGAACAAACACCGCGATCACCGCGATTATGACGTCAAATGTTTAAACAATCG<br>:           :   :                                 :                 :  |
| Cisavi                              | GGAACCTGAAGACAAACAC-----GATTATGACGT-AGCTGTTTAAACAAGCG                                                                                 |
| Ciinte                              | ATGTCTGCATATTTTCGACGCGAATGAATATCTTAGAAATCATCGTAGATTATTTTATAAT<br>                            :           : : :     :     : : :        |
| Cisavi                              | ATG---CATATTT-----ATCATAGAAATAACAGAAAATTGGCGCACTAT                                                                                    |
| Ciinte                              | GTCTATTATG----ACGTAAACATTCGATTAAT-----AATCGCGCCTGTTTGAAAGAT<br>: :     :     :     : : : : :     :     :     :     : : :     : :      |
| Cisavi                              | CACCATAATATTCAACGCGAAGTCAGACTAAGCACTTTAAATCAGAACTTTCTTAAATTATT                                                                        |
| Ciinte                              | T-----CTTTTGTTTTTAATAAAAATTAAAACCTTTTATGACCAG-ACAGATTGTTTAT<br>  : : : :             :     : : :           :                          |
| Cisavi                              | TGATTAATTCTGCTTTTAATAATAATCGAGA-TTTTATGATCAAGACAGATTGTTTAT                                                                            |
| Ciinte                              | GACGTCATAATCAGTCAACAATGACAACCTTAATCCGTGTTTATTACTATGATGTAACAA<br>  : : :       : : :   :   :     :           :           :   :     : : |
| Cisavi                              | GATTATATAATGACACAGCGATGTCAAATTTAATCCTTGTTTATTGCTGTGATTAAACAA                                                                          |
| Ciinte                              | TGGTAGATTATGTAAACAA--TAGAATCACACACC GTATTGTTACGTCACAAATTCT<br>  : : : :   :           : :   :   : :     : :             :         :   |
| Cisavi                              | TGAGCTTTTGTGTAAACAAGGCCGAGTCCTAC-CTGCATTGTTACGTCATAAATTCC                                                                             |
| Region required for VDML expression |                                                                                                                                       |

Putative ventral regulators:

- AGAC Smad Binding Element (AGAC)
- Tbx2/3
- Nkx2-3/5/6

Putative dorsal regulator:

- Msx
