# Supplementary material for: Conservation of peripheral nervous system formation mechanisms in divergent ascidian embryos
Source: eLife journal article supplement (doi:10.7554/elife.59157), 2020-11-16
Supplement: supp [file elife-59157-supp-v1.zip › elife_poa_e59157_Figure_3_figure_supplement_1.pdf]

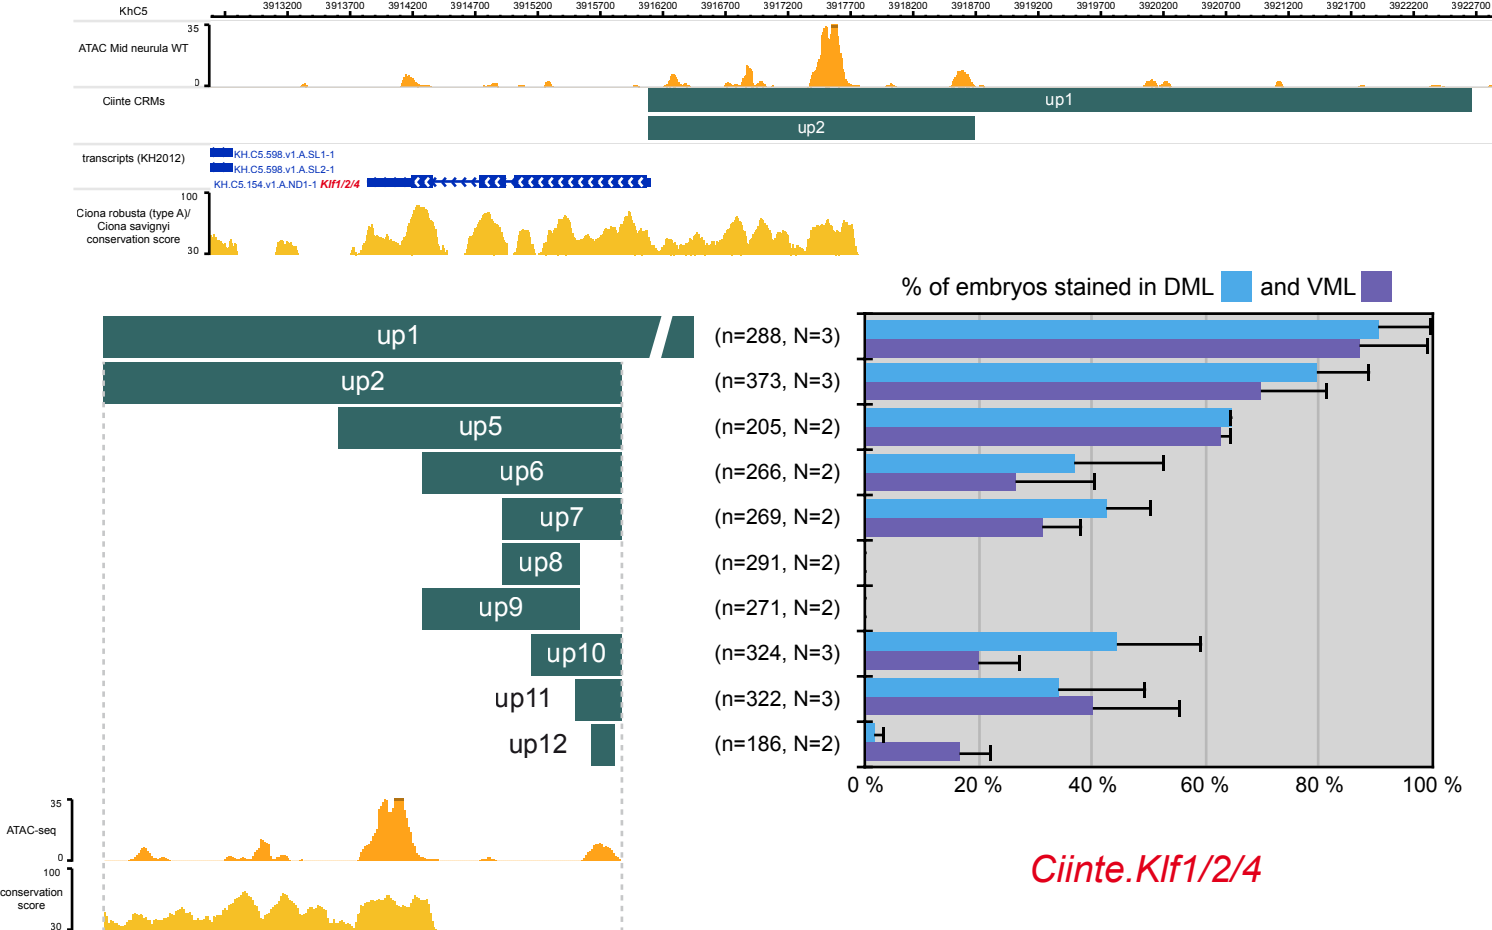

*Ciinte.Klf1/2/4*

### Region required for VDML expression

= *Ciinte.Klf1/2/4-up11*

>*Ciinte.Klf1/2/4-up7*

TGTGTGGACTTGGAACCTAAACCGTTTCGCGCCGACAATAAAACTACCGATTATCTTTTGGAAACGAAGCGTGTTC

TTGCGTTTTCGTTACTTTATTACAGCTGCGAATCGCGTAAGTCGCTTAATTAGGGTCTTTATTACCAAATAGCC

ACGCGTCTTCTTGATTTCTATTGTTTATAACGAGCAGCGAATTAGAAGGCAAGGAAATGTTTCCGTGAAAGGTGA

AATTTTTTTCAAACATTTTGTAGTAAAAAATATTTCTGAGATTTTAAATGTTGAATTTAATTTCAAATAAAGTT

CAAACATGTACATTAAAACTTGTAATTAAAGCAGTTATCAATAAAAAATACTGTGTATTTTTTCGGCAAATATTGC

AAAAAAAAACATTTTCCAAAACTTATGACTGAAAAAATTAAAAAATGCCAAAAAGTAATACCAAAAAATAACAT

TAATTCCATTTTAATGCAAGTTATTAAAAGGTGACGTCTTTGATTATACATATCTCGGCGGCCAAGAGAAGATT

CTGGTTTGAAGGTTTAAACAATCGCTCTTTATTGTGTTTCAAATGTTTAGCAAAACCGGGTTATGGTCAAACCGC

TGCA

### Putative regulators:

- Msx
- Ascl.b
- Klf1/2/4
