# Supplementary material for: Conservation of peripheral nervous system formation mechanisms in divergent ascidian embryos
Source: eLife journal article supplement (doi:10.7554/elife.59157), 2020-11-16
Supplement: supp [file elife-59157-supp-v1.zip › elife_poa_e59157_Figure_3_figure_supplement_2.pdf]

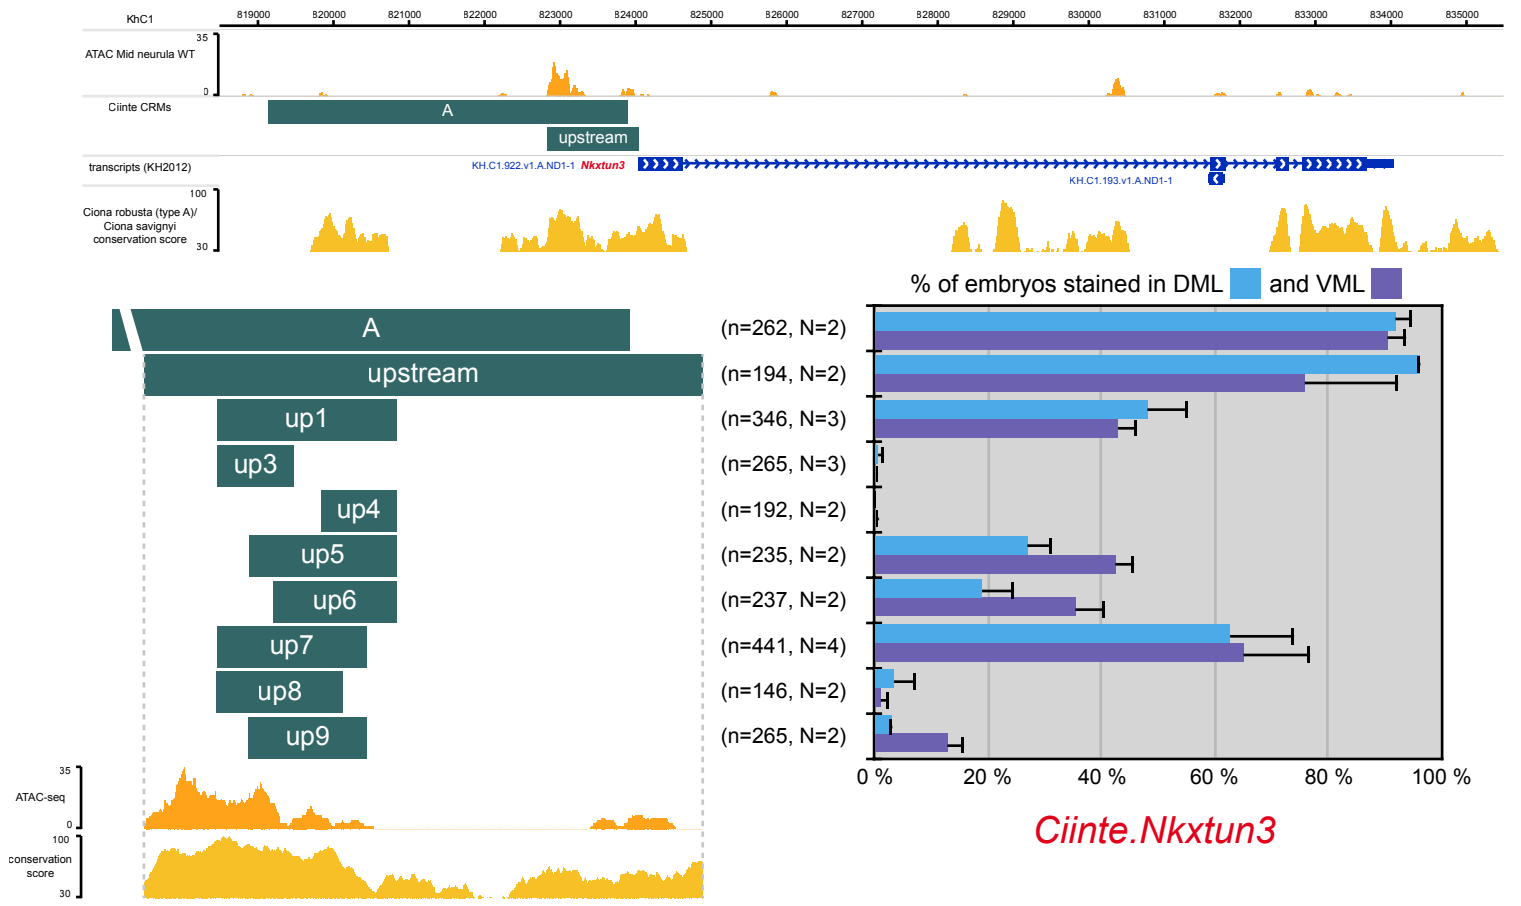

Ciinte.Nkxtun3-up7

Region required for VDML activity (deleted in up9)

Ciinte  
Cisavi

CAGCGTGTCCGTTTGTTCCTTGTTAATAGAACTTAATTACAGGGTGTCTGTTGCTATGACACCGTATCGGTTTCGTTTCCTAGTTAATAGAACATAATTACAGGGTGGTGTCGCAATGC

\*\*\*\*\*

Ciinte  
Cisavi

TGACAAGATAAGATGGCGGGCGCTTCTCATCTGGCTTGTGTTGGCAACAATTGATCGATAGTAACAATACAAGGT---GGTCTCTCTCATCTACTGTGTGTCCGCAACAATTGATCGATGA

\*\*\*\*\*

Ciinte  
Cisavi

CCAAATCGCATTATGAGTCATAACTAAAATTCGAATGCGGGTGGT-GAATTCGAACAAAACTAATCGTATTATAACTTATAATTAAACTCGATTACGACGAATGGAAATTGAAAAAA

\*\*\*\*\*

Ciinte  
Cisavi

ACGTCGCGCTAACTCGACAGCACTATTGCGTCATAAAAAGTCGTAAAGGCGCGCGCTTAACGCTAAAACCTCG---TCATTTTATGCCATAAATAATCATAAAATGGCTTTCCTTAAC

\*\*\*\*\*

Ciinte  
Cisavi

ACGAGTAATTACGGAAAAATTATGACATCGTTTAAATTTCTTACAACACTGTTTACGTCGTAGCGAGTAATTACCTCAAATTATGGCACCCTTTAAATTCATTAAACTGTTTATGTCACAC

\*\*\*\*\*

Ciinte  
Cisavi

AGCGTCTCATTCATTGTGGGCGTTTGTAAATGTACAGCAAGAAAGCTCTTTG

\*\*\*\*\*

Region required for VDML activity (deleted in up8)

Putative regulators:

- Msx
- Ascl.b
- Klf1/2/4
- Nkxtun3
