# Supplementary material for: Conservation of peripheral nervous system formation mechanisms in divergent ascidian embryos
Source: eLife journal article supplement (doi:10.7554/elife.59157), 2020-11-16
Supplement: supp [file elife-59157-supp-v1.zip › elife_poa_e59157_Figure_3_figure_supplement_3.pdf]

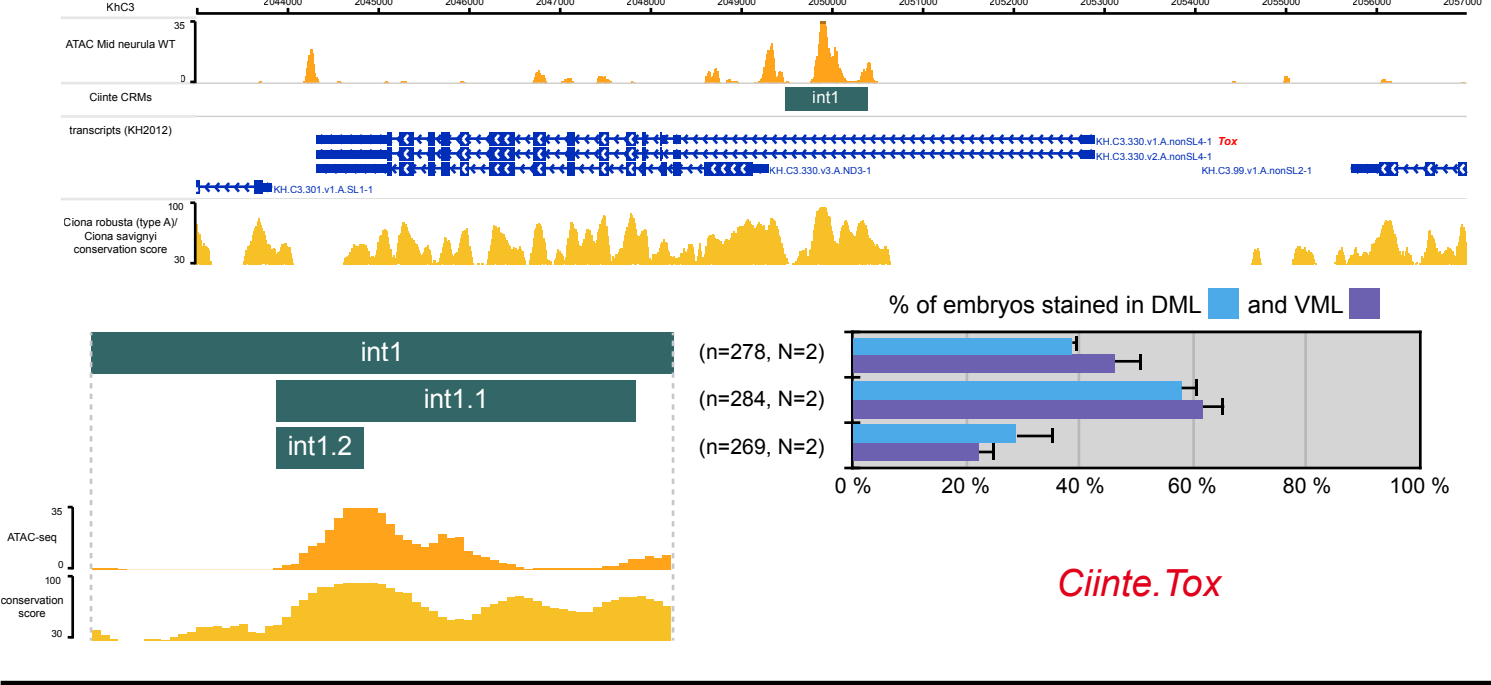

Ciinte.Tox-int1.1

|        |                                                               |
|--------|---------------------------------------------------------------|
| Ciinte | CACTCTTGTTTGATTTATGGCTGAACTGCTTTGATGTGCTTCGAGTT-GGAGATTTTTCG  |
| Cisavi | CACTTCTGCCTGATTTATTGCCTTGCTGCTTTGATGTGTCTCGACTTCGGAGATTTTTCG  |
| Ciinte | ACTTGCGGCAGATGTTCCATTCTCTAAACAATGGCGGA-----GATGAATTATGCC      |
| Cisavi | ACTTGCGGCAGATGTTCTCTTCTCTAAACAATGGCGGAAACGCTGGAGATGAATGATCAC  |
| Ciinte | TGATATTTTCGCCACGCCGTAGGTTTCTTTGCTTTCCCAAGGCGCGAAATTGGTTTTCTC  |
| Cisavi | TGCTATTT-CTCAGCGCAATGGGTTTCTTTGCTTTGCAGTGTTGCGGAA--AGCTTTATC  |
| Ciinte | TCTTTTCTACGCTTTGTGTTTTCTATCCACGTCGAGATTTTGTGTCATCGCTTCGTGTTT  |
| Cisavi | TCTTCGTGGTGTATTGTGTGCTTT-CGTCAGGTCGAGATTTTGTGTCATCGGAGCTTGTTT |
| Ciinte | GCCTTTCCGTAATGTGTTTGTCTTGCTAATTCTCGAACAGAAGGCGAAATGTAAATACAC  |
| Cisavi | GTTTTACCGTAATGTGTTTGCCTTGCTAATTCACGAACAGAAGGCGGTGTGTAAATAATC  |
| Ciinte | GTTGCCGA--CGCGACACAAACTGCCGTTGTTTCATCAACACGTATTGACAGC--GACAAA |
| Cisavi | TCCGCCGGGTTGTGATATAAACTAGCACTTCTCGCAAACACGATTCCACGGCCGGATCCA  |
| Ciinte | CGCTGGTCCAACCAGCCAATTCTGCACCGTTTCCGTCGCCCCGAAGTCTCGAGGAGAGAAT |
| Cisavi | CGTTG-----CATTCGGCATCGTTTCCGGCGGCAAAGAACGCGACGTGCGAAT         |
| Ciinte | TTACAAGCATGAAATGCAGTTATTGCGCGGTCGGAACACGTTTACGCCTTATCTTTGTTT  |
| Cisavi | TAACAAGCATGAAATGCAGTTATTGCGCGCTCGGA-CACGTTTACGCCTTATCTTTGTTT  |
| Ciinte | ACTCTCGGCCGCGACCTGAGGACGAGCACGCGCCAGTCTGGCGCCACTATGACATAACAA  |
| Cisavi | ACTCTCCGCCGCGACCTTAGAACGAGCACGCGCCAGTCTGGCGCCACTATGACATAACAA  |
| Ciinte | TTGCGATTCTGCACTGCCCTC-GAAGCGGCAGGTGTTGCGTCACGCATGGCTGCGTAC    |
| Cisavi | TTGCGACTCTGCACTGCCCTCGAAGCGGCAGGTGTTGCTTCACGCATGGTCGCTCGT     |
| Ciinte | AATATTCAATTATTAATCGTCTTT                                      |
| Cisavi | AATATTCAATTATTAATCGCCTTT                                      |

Putative regulators:

- Msx
- Ascl.b
- Klf1/2/4
- Nkxtun3
