# Supplementary material for: Conservation of peripheral nervous system formation mechanisms in divergent ascidian embryos
Source: eLife journal article supplement (doi:10.7554/elife.59157), 2020-11-16
Supplement: supp [file elife-59157-supp-v1.zip › elife_poa_e59157_Figure_5_figure_supplement_1.pdf]

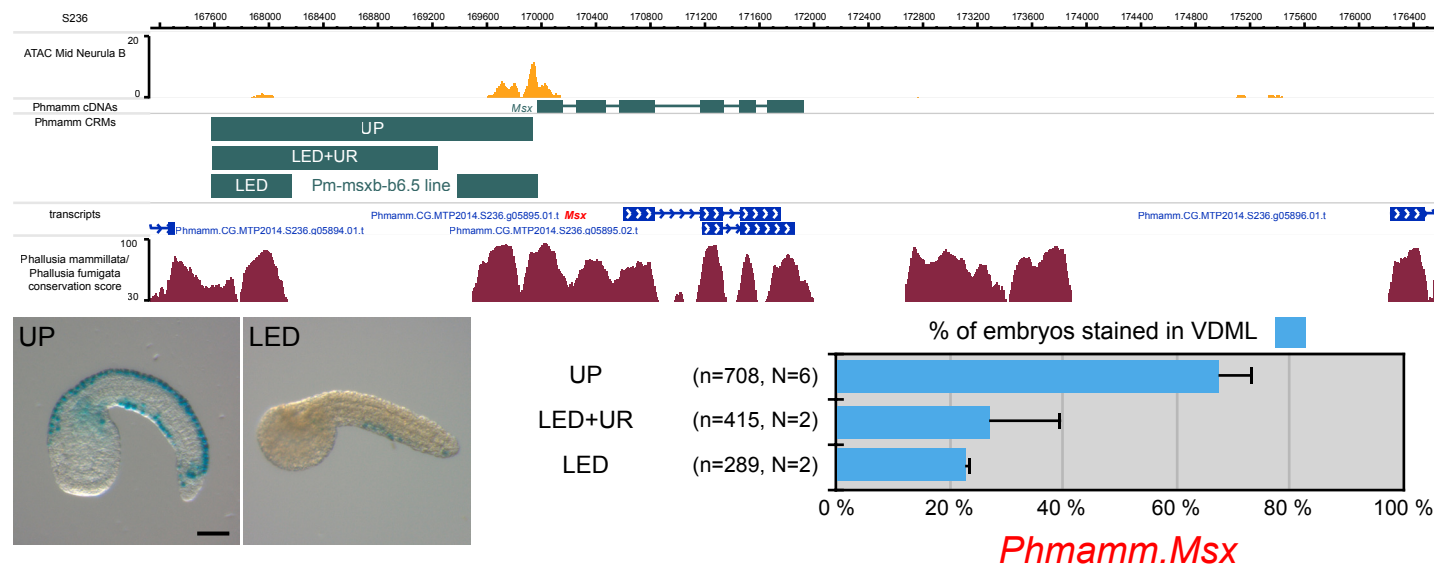

## Phmamm.Msx-LED

|        |                                                                                                  |
|--------|--------------------------------------------------------------------------------------------------|
| Phmamm | ATTTCTGTAGCTGCCAACA---TGTTTACGGTGCTCTG-CTAACGTGCTGTGATTGTTTA                                     |
| Phfumi | ATATCTACAACAGCCAACAGCACGTTTACGGTTTTTCATCCAACGTGCCGTGACCGTTCA                                     |
| Phmamm | TGGCGC <b>TTAATT</b> GTGTGAAGAAAATACTAGTGTCCATAAAATACAAAAC <b>AACTAC</b> <b>CCAAT</b>            |
| Phfumi | CGGCACTTTATTGTTTGAAGAAAATTGTGGCGTCTCTAA--TTTAAGAC <b>AACTAC</b> <b>GCAAT</b>                     |
| Phmamm | <b>CAC</b> <b>TTTTAA</b> G-GCAATATAATTTTCGCATGTGCGTTTGATCAGCTCGTTAATTTCAAATC                     |
| Phfumi | <b>CAC</b> <b>TTTTAA</b> <b>GTGCAATAAAATCTTC</b> GCTTGTACGTTTGATCGGCTCGTTAAGTTCTGAATC            |
| Phmamm | GC <b>GGCGTC</b> GACAAGAACATAAACTC <b>GTCT</b> GCTC <b>GACGTCT</b> GACGCGT <b>GTCT</b> GGCACCAC  |
| Phfumi | GC <b>GGCGTC</b> GACGAGAATA-AAAACTT <b>GTCT</b> GCTG <b>GACGTCT</b> GACGCGT <b>GTCT</b> GGCACAAC |
| Phmamm | CCTGCTTACAGAA <b>GTCT</b> <b>TACGTCT</b> TGTTTTCTTTATTCCATAAATACCTGGCCCCCAAAAA                   |
| Phfumi | CCTGATTACCAA <b>GTCTGTCT</b> CTTGTTTGCTTTACTTT-TCGCTAACTGAAAAACCAACA                             |
| Phmamm | ATGTTGAAACAACTTTTTTGTGA-----ATATAAAATAGAAATAACCAAAC                                              |
| Phfumi | ATATTCAAAGAATACATTTGTGCAATTAGATTAAAAAACATACCCAAAC                                                |

## Putative ventral regulators:

- AGAC** Smad Binding Element (AGAC)
- Bmp Responsive Element (GRCGNC)**
- Nkxtun1**
- Nkx2-3/5/6**

## Putative dorsal regulator:

- Msx**
