# Supplementary material for: Conservation of peripheral nervous system formation mechanisms in divergent ascidian embryos
Source: eLife journal article supplement (doi:10.7554/elife.59157), 2020-11-16
Supplement: supp [file elife-59157-supp-v1.zip › elife_poa_e59157_Figure_5_figure_supplement_3.pdf]

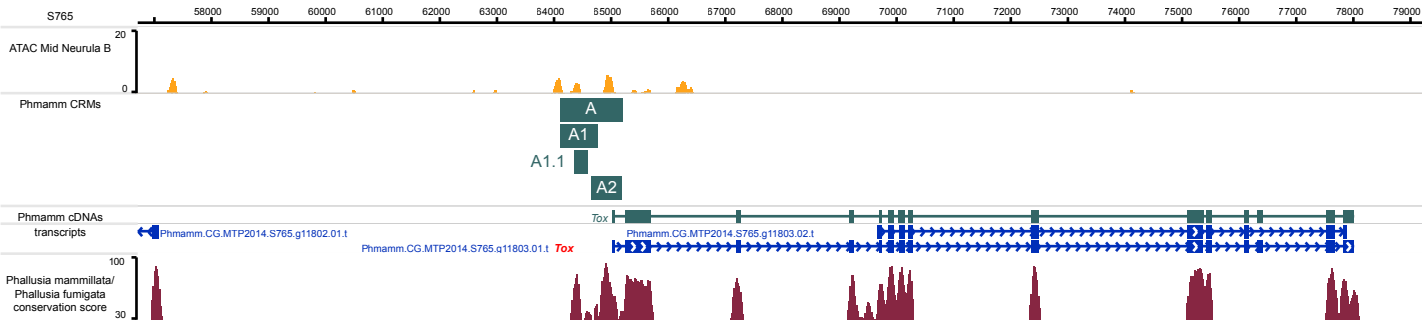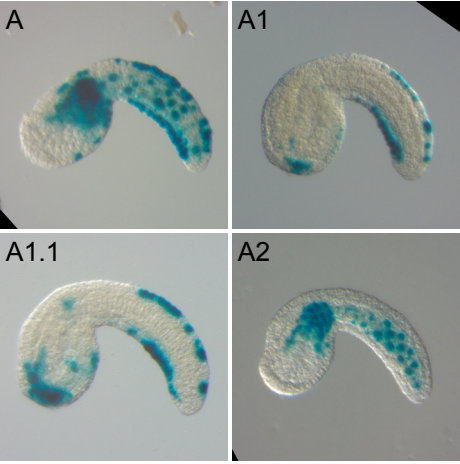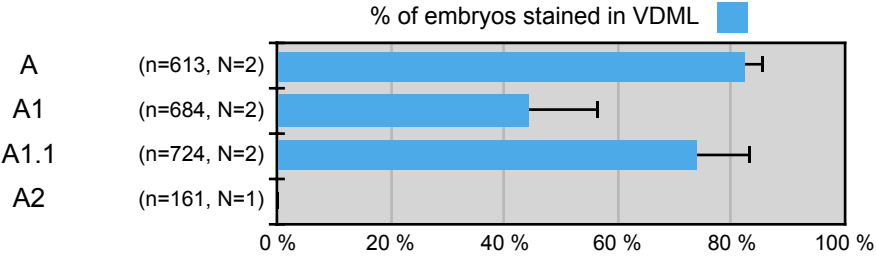

Phmamm.Tox

Phmamm.Tox-A1

|        |                                                              |  |
|--------|--------------------------------------------------------------|--|
| Phmamm | ATGAACTCATGAAATCCTAAGAGGAAATACACTATCTACGAAATTGTTTATTTAACTTCC |  |
| Phfumi | ATGAACACAT---ACGCCAGGAGGAAATACTGTGATT--GAGATTGTTTATTTACCTTTT |  |
| Phmamm | TAAATTCGCTCAGGTCGTGTTTGT---GTAGTGCACGGGGCACTGCCAGCCAGGGTGG   |  |
| Phfumi | CGAATTCGCTCGGGCGTGTTTGTTTTTGGCAGCACACGGGGCTTGCCCGCCAGTGTGG   |  |
| Phmamm | CGCCCATATAATGACAGGTTTACCGTCCTTGACCTGCCGTCGAGGGGCAGGTGCTCCG   |  |
| Phfumi | CGCCAATATAATGACATGTTTTTCTTCCTTGACCTGCCGTCGAGGGGCAGGTGTTCCG   |  |
| Phmamm | CCACGCACCAATGAACACTAAATTATTTATTATTTTG-TATTGATTCCGAATTTCCAAT  |  |
| Phfumi | ACGCGCATCACTGAACACTGAATTATTTATTATTTTTCTGTTGATTCTGAATTTAGTAT  |  |
| Phmamm | CCAACTCAGATTTGGTCGGAAGTGTAAACAA---TGTTACACAAATTAAAGGCTTTTGA  |  |
| Phfumi | CAGA-----ACTTGTTAAACAATATCAACAAAATTTTCAACAAATGAAGTGAATTTTAA  |  |
| Phmamm | CTA-----TTGTTTTGTTTTATTTT---AAAATCC-----                     |  |
| Phfumi | TTGATATGTTTTGTGATGTTCTAGTTTTACCGAAATCAAAGTGCGGCTACTTGGTGGGTA |  |
| Phmamm | -----CCTCCGCCGCATTTGAACAAAAAGAAAAAGACAATGTAATA-----AGA       |  |
| Phfumi | TAGCATGTTATAGTTGTGTTAAATAACAAGTAAAAAC--ATGTGATTGTGAATGTTAGA  |  |
| Phmamm | ATAATGTGCGGAAGA-----AAAATATAAACATGTC                         |  |
| Phfumi | ATTACG---GTAAGACTTTTCAGTGTTAGCATTACGCTAAGACTAAAATAAAAACAAGTC |  |
| Phmamm | AAATACAAAAACAG-TATGCCCCGGAACGTCGAAA-----AATATTTGT            |  |
| Phfumi | AAATGTCAAGACAGGTTTGCATTTAAAAATTACAAAATTAATAGCTAGAACAAAATAAGT |  |

Phmamm.Tox-A1.1

Putative regulators:

- Msx
- Ascl.b
- Klf1/2/4
- Nkxtun3
