# Supplementary material for: Conservation of peripheral nervous system formation mechanisms in divergent ascidian embryos
Source: eLife journal article supplement (doi:10.7554/elife.59157), 2020-11-16

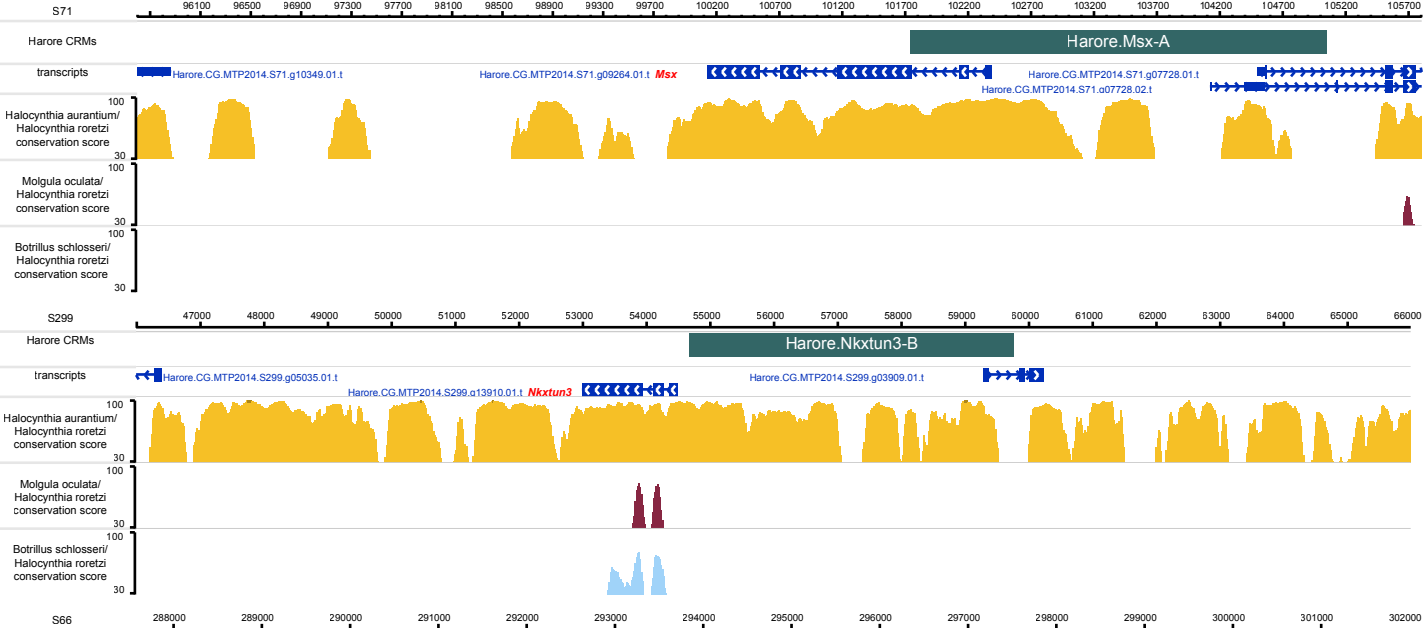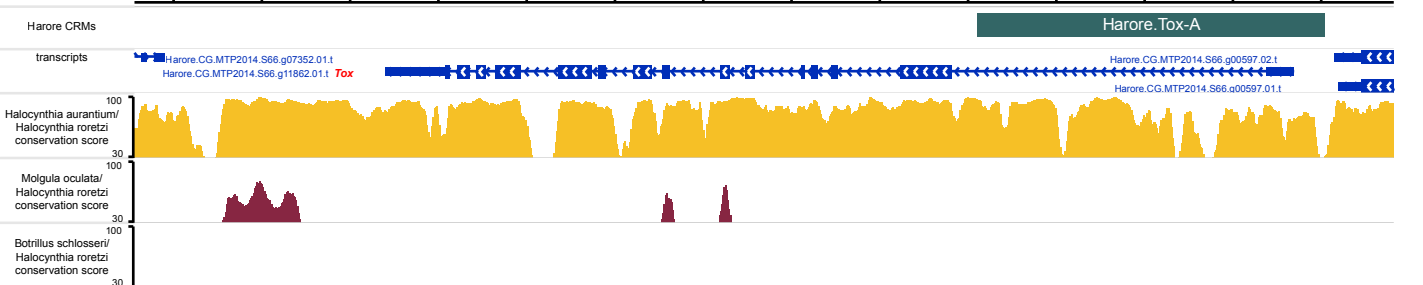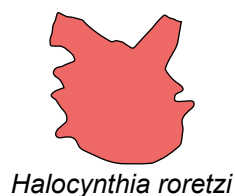

*Msx*

*Nkxtun3*

*Tox*

Harore.Msx-A

Harore.Nkxtun3-B

Harore.Tox-A

(n=258, N=2)

(n=202, N=2)

(n=127, N=2)

(n=420, N=2)

% of embryos stained in VDML in

*M. appendiculata*

and *P. mammillata*

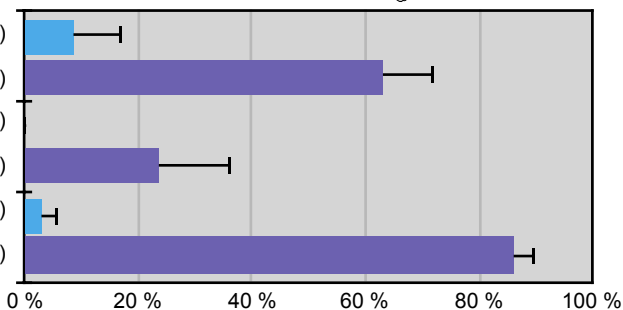

Supplement: supp [file elife-59157-supp-v1.zip › elife_poa_e59157_Figure_9_figure_supplement_2.pdf]
