# Supplementary material for: Conservation of peripheral nervous system formation mechanisms in divergent ascidian embryos
Source: eLife journal article supplement (doi:10.7554/elife.59157), 2020-11-16
Supplement: supp [file elife-59157-supp-v1.zip › elife_poa_e59157_Supplementary_file_1.xlsx]

## Sheet: Feuil1
Gene name	Other name	Gene ID	Genomic region name	Size (bp)	Coordinates on genome browser	Forward primer	Reverse primer	Template	pENTRY generation method	pDEST
Ciona intestinalis CRMs (KH2012 assembly)
Nkxtun3	Nkx-C	KH2012:KH.C1.922	Ciinte.Nkxtun3-A	4754	KhC1:819143-823896	tgtccttcgcatacagcttg	acgaccagaagattcgcact	genomic DNA	pCR8/GW/TOPO TA cloning	pSP1.72-RfA-bpFOG-nlsLacZ
			Ciinte.Nkxtun3-upstream	1213	KhC1:822842-824054	ATAAAGTAGGCTagatgcatgagaaggtggttatctc	CAAAAGTTGGGTtcgcttcaagtcgatttatgttatg	genomic DNA	BP reaction with pDONR221-P3-P5	pSP72BSSPE-R3-ccdB/cmR-R5-B1-nlsLacZ-B2
			Ciinte.Nkxtun3-up1	391	KhC1:823000-823390	ggggacaagtttgtataataaagtaggctTCAGCGTGTCCGTTTGTTTCC	ggggaccactttgtatagaaaagttgggtGCCCTAATGATTTTCACTGGG	CiNkxC_upstream	BP reaction with pDONR221-P3-P4	pSP72BSSPE-R3-ccdB/cmR-R4-bpFog-B5-B1-nlsLacZ-B2
			Ciinte.Nkxtun3-up3	168	KhC1:823000-823167	ggggacaagtttgtataataaagtaggctTCAGCGTGTCCGTTTGTTTCC	ggggaccactttgtatagaaaagttgggtTCACCTCTCGCATTCGAATTT	CiNkxC_upstream	BP reaction with pDONR221-P3-P4	pSP72BSSPE-R3-ccdB/cmR-R4-bpFog-B5-B1-nlsLacZ-B2
			CiinteNkxtun3-up4	165	KhC1:823226-823390	ggggacaagtttgtataataaagtaggctAGGCGTGCGCTTAAACGAGTA	ggggaccactttgtatagaaaagttgggtGCCCTAATGATTTTCACTGGG	CiNkxC_upstream	BP reaction with pDONR221-P3-P4	pSP72BSSPE-R3-ccdB/cmR-R4-bpFog-B5-B1-nlsLacZ-B2
			Ciinte.Nkxtun3-up5	322	KhC1:823069-823390	ggggacaagtttgtataataaagtaggctTAAGAAGGCGGGCGCTTCT	ggggaccactttgtatagaaaagttgggtGCCCTAATGATTTTCACTGGG	CiNkxC_upstream	BP reaction with pDONR221-P3-P4	pSP72BSSPE-R3-ccdB/cmR-R4-bpFog-B5-B1-nlsLacZ-B2
			Ciinte.Nkxtun3-up6	269	KhC1:823122-823390	ggggacaagtttgtataataaagtaggctCAAATCGCATTATGACTGATAAT	ggggaccactttgtatagaaaagttgggtGCCCTAATGATTTTCACTGGG	CiNkxC_upstream	BP reaction with pDONR221-P3-P4	pSP72BSSPE-R3-ccdB/cmR-R4-bpFog-B5-B1-nlsLacZ-B2
			Ciinte.Nkxtun3-up7	326	KhC1:823000-823325	ggggacaagtttgtataataaagtaggctTCAGCGTGTCCGTTTGTTTCC	ggggaccactttgtatagaaaagttgggtCTAAACGCCCACAATGAATGA	CiNkxC_upstream	BP reaction with pDONR221-P3-P4	pSP72BSSPE-R3-ccdB/cmR-R4-bpFog-B5-B1-nlsLacZ-B2
			Ciinte.Nkxtun3-up8	275	KhC1:823000-823274	ggggacaagtttgtataataaagtaggctTCAGCGTGTCCGTTTGTTTCC	ggggaccactttgtatagaaaagttgggtTAAACGATGTCATAATTTTCTCG	CiNkxC_upstream	BP reaction with pDONR221-P3-P4	pSP72BSSPE-R3-ccdB/cmR-R4-bpFog-B5-B1-nlsLacZ-B2
			Ciinte.Nkxtun3-up9	257	KhC1:823069-823325	ggggacaagtttgtataataaagtaggctTAAGAAGGCGGGCGCTTCT	ggggaccactttgtatagaaaagttgggtCTAAACGCCCACAATGAATGA	CiNkxC_upstream	BP reaction with pDONR221-P3-P4	pSP72BSSPE-R3-ccdB/cmR-R4-bpFog-B5-B1-nlsLacZ-B2
Dlx.c	Dll-C	KH2012:KH.C7.770	Ciinte.Dlx.c-A2	4842	KhC7:3005885-3010726	ttctcccaccctttttgtgg	GCGGAGGAAAAACAAAATGG	genomic DNA	pCR8/GW/TOPO TA cloning	pSP1.72-RfA-bpFOG-nlsLacZ
			Ciinte.Dlx.c-upstream	603	KhC7:3007229-3007831	ataaagtaggcTTTTTTGGACCTTTATTAATAGCTTGAG	gaaaagttgggtATACGAGCCTCTCTGTTCAAAACTG	genomic DNA	BP reaction with pDONR221-P3-P4	pSP72BSSPE-R3-ccdB/cmR-R4-bpFog-B5-B1-nlsLacZ-B2
			Ciinte.Dlx.c-up1	423	KhC7:3007332-3007754	ggggacaagtttgtataataaagtaggctTGTCGCCACTTTGTTTGTTTG	ggggaccactttgtatagaaaagttgggtAGGGCGGCATCGGCTGAAGG	CiDllCupstream	BP reaction with pDONR221-P3-P4	pSP72BSSPE-R3-ccdB/cmR-R4-bpFog-B5-B1-nlsLacZ-B2
			Ciinte.Dlx.c-up2	318	KhC7:3007437-3007754	ggggacaagtttgtataataaagtaggctTGTCGCCACTTTGTTTGTTTG	ggggaccactttgtatagaaaagttgggtAGTCGCTTCGATTTCCAATCT	CiDllCupstream	BP reaction with pDONR221-P3-P4	pSP72BSSPE-R3-ccdB/cmR-R4-bpFog-B5-B1-nlsLacZ-B2
			Ciinte.Dlx.c-up3	500	KhC7:3007332-3007831	ataaagtaggcTTTTTTGGACCTTTATTAATAGCTTGAG	ggggaccactttgtatagaaaagttgggtAGGGCGGCATCGGCTGAAGG	CiDllCupstream	BP reaction with pDONR221-P3-P4	pSP72BSSPE-R3-ccdB/cmR-R4-bpFog-B5-B1-nlsLacZ-B2
			Ciinte.Dlx.c-up4	526	KhC7:3007229-3007754	ggggacaagtttgtataataaagtaggctTGTCGCCACTTTGTTTGTTTG	gaaaagttgggtATACGAGCCTCTCTGTTCAAAACTG	CiDllCupstream	BP reaction with pDONR221-P3-P4	pSP72BSSPE-R3-ccdB/cmR-R4-bpFog-B5-B1-nlsLacZ-B2
			Ciinte.Dlx.c-up5	395	KhC7:3007437-3007831	ataaagtaggcTTTTTTGGACCTTTATTAATAGCTTGAG	ggggaccactttgtatagaaaagttgggtAGTCGCTTCGATTTCCAATCT	CiDllCupstream	BP reaction with pDONR221-P3-P4	pSP72BSSPE-R3-ccdB/cmR-R4-bpFog-B5-B1-nlsLacZ-B2
			Ciinte.Dlx.c-up6	279	KhC7:3007229-3007507	ataaagtaggctAATGCACCATTCCATGTCCG	gaaaagttgggtATACGAGCCTCTCTGTTCAAAACTG	CiDllCupstream	BP reaction with pDONR221-P3-P4	pSP72BSSPE-R3-ccdB/cmR-R4-bpFog-B5-B1-nlsLacZ-B2
			Ciinte.Dlx.c-up7	206	KhC7:3007229-3007434	TCGCCGGTCGCGGAAAAC	ATACGAGCCTCTCTGTTCAAAAC	CiDllCupstream	pCR8/GW/TOPO TA cloning	pSP1.72-RfA-bpFOG-nlsLacZ
			Ciinte.Dlx.c-up8	105	KhC7:3007229-3007333	CTTTGAAGACGCCGAGCTG	ATACGAGCCTCTCTGTTCAAAAC	CiDllCupstream	pCR8/GW/TOPO TA cloning	pSP1.72-RfA-bpFOG-nlsLacZ
Klf1/2/4		KH2012:KH.C5.154	Ciinte.Klf1/2/4-up1	6585	KhC5:3916085-3922669	TCCTTCTTAGCAAAGAGTTTACC	CCAATTACCATTCGTCTAACATACAA	genomic DNA	pCR8/GW/TOPO TA cloning	pSP1.72-RfA-bpFOG-nlsLacZ
			Ciinte.Klf1/2/4-up2	2614	KhC5:3916085-3918698	TGTGTGGACTTGGAAACTAAACC	CCAATTACCATTCGTCTAACATACAA	CiKlfup1	pCR8/GW/TOPO TA cloning	pSP1.72-RfA-bpFOG-nlsLacZ
			Ciinte.Klf1/2/4-up5	1429	KhC5:3917270-3918698	TGTGTGGACTTGGAAACTAAACC	ATTCACTGGCTAGTTTACTCAC	CiKlfup1	pCR8/GW/TOPO TA cloning	pSP1.72-RfA-bpFOG-nlsLacZ
			Ciinte.Klf1/2/4-up6	1007	KhC5:3917692-3918698	TGTGTGGACTTGGAAACTAAACC	TCGAGAGTAATATATGCAATGGC	CiKlfup1	pCR8/GW/TOPO TA cloning	pSP1.72-RfA-bpFOG-nlsLacZ
			Ciinte.Klf1/2/4-up7	604	KhC5:3918095-3918698	TGTGTGGACTTGGAAACTAAACC	TGCAGCGGTTTGACCATAACC	CiKlfup1	pCR8/GW/TOPO TA cloning	pSP1.72-RfA-bpFOG-nlsLacZ
			Ciinte.Klf1/2/4-up8	393	KhC5:3918095-3918487	TACGTGAAAAGTGAAATTTGTTTC	TGCAGCGGTTTGACCATAACC	CiKlfup1	pCR8/GW/TOPO TA cloning	pSP1.72-RfA-bpFOG-nlsLacZ
			Ciinte.Klf1/2/4-up9	796	KhC5:3917692-3918487	TACGTGAAAAGTGAAATTTGTTTC	TCGAGAGTAATATATGCAATGGC	CiKlfup1	pCR8/GW/TOPO TA cloning	pSP1.72-RfA-bpFOG-nlsLacZ
			Ciinte.Klf1/2/4-up10	458	KhC5:3918241-3918698	TGTGTGGACTTGGAAACTAAACC	TGGAATTAATGTACGTTTTTGGTA	CiKlfup1	pCR8/GW/TOPO TA cloning	pSP1.72-RfA-bpFOG-nlsLacZ
			Ciinte.Klf1/2/4-up11	235	KhC5:3918464-3918698	TGTGTGGACTTGGAAACTAAACC	GAAACAAATTTCACTTTTCACGTA	CiKlfup1	pCR8/GW/TOPO TA cloning	pSP1.72-RfA-bpFOG-nlsLacZ
			Ciinte.Klf1/2/4-up12	118	KhC5:3918544-3918661	ATGGAACTACCGATTATCTT	CGCGTGGCTATTTGGTAATA	CiKlfup1	pCR8/GW/TOPO TA cloning	pSP1.72-RfA-bpFOG-nlsLacZ
Tox	Cagf9	KH2012:KH.C3.330	Ciinte.Tox-int1	913	KhC3:2049484-2050396	ATAAAGTAGGCTcacactcttgtttgatttatggctg	GAAAAGTTGGGTgattagcattacgaccgcaaaac	genomic DNA	BP reaction with pDONR221-P3-P4	pSP72BSSPE-R3-ccdB/cmR-R4-bpFog-B5-B1-nlsLacZ-B2
			Ciinte.Tox-int1.1	565	KhC3:2049774-2050338	ggggacaagtttgtataataaagtaggctTCGACTTGCGGCAGATGTTC	ggggaccactttgtatagaaaagttgggtCTAGAACTCGTAAAAGACGA	CiCAGF9int1	BP reaction with pDONR221-P3-P4	pSP72BSSPE-R3-ccdB/cmR-R4-bpFog-B5-B1-nlsLacZ-B2
			Ciinte.Tox-int1.2	138	KhC3:2049774-2049911	ggggacaagtttgtataataaagtaggctGAGGACGAGCACGCGCCAG	ggggaccactttgtatagaaaagttgggtCTAGAACTCGTAAAAGACGA	CiCAGF9int1	BP reaction with pDONR221-P3-P4	pSP72BSSPE-R3-ccdB/cmR-R4-bpFog-B5-B1-nlsLacZ-B2
Ascl.b	Achaete-scute a-like2	KH2012:KH.L9.13	Ciinte.Ascl.b-upstream	758	KhL9:186024-186781	ATAAAGTAGGCTatgacgctgaagagtcgcttaaata	CAAAAGTTGGGTaatttcaattcgacacggacctat	genomic DNA	BP reaction with pDONR221-P3-P5	pSP72BSSPE-R3-ccdB/cmR-R5-B1-nlsLacZ-B2
			Ciinte.Ascl.b-do1	682	KhL9:189202-189883	ataaagtaggctCTTCGATTGTTTGCTTTGCTTGG	gaaaagttgggtTGATGACGTAATCGGATTACACTTC	genomic DNA	BP reaction with pDONR221-P3-P4	pSP72BSSPE-R3-ccdB/cmR-R4-bpFog-B5-B1-nlsLacZ-B2
			Ciinte.Ascl.b-do2	575	KhL9:189202-189776	ataaagtaggctCTTCGATTGTTTGCTTTGCTTGG	gaaaagttgggtAGAACTTGTGACGTAACAATAC	CiAshdo1	BP reaction with pDONR221-P3-P4	pSP72BSSPE-R3-ccdB/cmR-R4-bpFog-B5-B1-nlsLacZ-B2
			Ciinte.Ascl.b-do3	456	KhL9:189202-189657	ataaagtaggctCTTCGATTGTTTGCTTTGCTTGG	gaaaagttgggtAACAATCTGTTTGGTCATAAAAG	CiAshdo1	BP reaction with pDONR221-P3-P4	pSP72BSSPE-R3-ccdB/cmR-R4-bpFog-B5-B1-nlsLacZ-B2
			Ciinte.Ascl.b-do4	429	KhL9:189455-189883	ataaagtaggctACACCGCGATCACCGCGAT	gaaaagttgggtTGATGACGTAATCGGATTACACTTC	CiAshdo1	BP reaction with pDONR221-P3-P4	pSP72BSSPE-R3-ccdB/cmR-R4-bpFog-B5-B1-nlsLacZ-B2
			Ciinte.Ascl.b-do5	290	KhL9:189594-189883	ataaagtaggctGTCTGTTTGAAAGATTCTTTTG	gaaaagttgggtTGATGACGTAATCGGATTACACTTC	CiAshdo1	BP reaction with pDONR221-P3-P4	pSP72BSSPE-R3-ccdB/cmR-R4-bpFog-B5-B1-nlsLacZ-B2
Bhlhtun1	Orphan bHLH-1	KH2012:KH.C7.269	Ciinte.Bhlhtun1-upstream	370	KhC7:5792038-5792407	ATAAAGTAGGCTcatgcattatgcgttatacatggtattatg	CAAAAGTTGGGTGTGAATAAATATTGCGACGCTCGG	genomic DNA	BP reaction with pDONR221-P3-P5	pSP72BSSPE-R3-ccdB/cmR-R5-B1-nlsLacZ-B2
			Ciinte.Bhlhtun1-up1	1812	KhC7:5788863-5790674	ataaagtaggctCTGCAGTTTCTTGATAAAAATTACG	gaaaagttgggtGTCGTTTATCTCACAAACCGGTAC	genomic DNA	BP reaction with pDONR221-P3-P4	pSP72BSSPE-R3-ccdB/cmR-R4-bpFog-B5-B1-nlsLacZ-B2
			Ciinte.Bhlhtun1-down1	3665	KhC7:5794126-5797790	ataaagtaggctTGCTCTGTTAAGCTCAAGCTTAG	gaaaagttgggtTCGATTTAAACAAAACAAAAGTGAATC	genomic DNA	BP reaction with pDONR221-P3-P4	pSP72BSSPE-R3-ccdB/cmR-R4-bpFog-B5-B1-nlsLacZ-B2
Msx	Msxb	KH2012:KH.C2.957	Ciinte.Msx-Intergenic	2178	KhC2:5771380-5773557	GAAAGCTACGAAGGCGGAAA	ACTACTCGTCTGAGGGATGC	genomic DNA	pCR8/GW/TOPO TA cloning	pSP1.72-RfA-bpFOG-nlsLacZ
			Ciinte.Msx-upstream1	1223	KhC2:5771428-5772650	ATAAAGTAGGCTgtcataatcgaccgataaataagcg	GAAAAGTTGGGTacaagttcccaccaattactgttgt	genomic DNA	BP reaction with pDONR221-P3-P4	pSP72BSSPE-R3-ccdB/cmR-R4-bpFog-B5-B1-nlsLacZ-B2
			Ciinte.Msx-up1	458	KhC2:5772158-5772615	ggggacaagtttgtataataaagtaggctCATTTACCAGTGATTAAACAGGG	ggggaccactttgtatagaaaagttgggtGATCTAAAGGCCAACGAACTC	CiMsxb_upstream1	BP reaction with pDONR221-P3-P4	pSP72BSSPE-R3-ccdB/cmR-R4-bpFog-B5-B1-nlsLacZ-B2
			Ciinte.Msx-up2	276	KhC2:5772158-5772433	ggggacaagtttgtataataaagtaggctCATTTACCAGTGATTAAACAGGG	ggggaccactttgtatagaaaagttgggtGACGTCATATGCTGCCAGGG	CiMsxb_upstream1	BP reaction with pDONR221-P3-P4	pSP72BSSPE-R3-ccdB/cmR-R4-bpFog-B5-B1-nlsLacZ-B2
			Ciinte.Msx-up3	182	KhC2:5772434-5772615	ggggacaagtttgtataataaagtaggctATAAAATGGTTGCCAGGATCCC	ggggaccactttgtatagaaaagttgggtGATCTAAAGGCCAACGAACTC	CiMsxb_upstream1	BP reaction with pDONR221-P3-P4	pSP72BSSPE-R3-ccdB/cmR-R4-bpFog-B5-B1-nlsLacZ-B2
			Ciinte.Msx-up4	244	KhC2:5772372-5772615	ggggacaagtttgtataataaagtaggctGCACTCGCGTGCTGTCGCC	ggggaccactttgtatagaaaagttgggtGATCTAAAGGCCAACGAACTC	CiMsxb_upstream1	BP reaction with pDONR221-P3-P4	pSP72BSSPE-R3-ccdB/cmR-R4-bpFog-B5-B1-nlsLacZ-B2
			Ciinte.Msx-up5	395	KhC2:5772158-5772552	ggggacaagtttgtataataaagtaggctCATTTACCAGTGATTAAACAGGG	ggggaccactttgtatagaaaagttgggtCACTCAACATTAATAATCAGTTG	CiMsxb_upstream1	BP reaction with pDONR221-P3-P4	pSP72BSSPE-R3-ccdB/cmR-R4-bpFog-B5-B1-nlsLacZ-B2
			Ciinte.Msx-up6	336	KhC2:5772158-5772493	ggggacaagtttgtataataaagtaggctCATTTACCAGTGATTAAACAGGG	ggggaccactttgtatagaaaagttgggtGATATTCGGGTCATAAAAGTGA	CiMsxb_upstream1	BP reaction with pDONR221-P3-P4	pSP72BSSPE-R3-ccdB/cmR-R4-bpFog-B5-B1-nlsLacZ-B2
			Ciinte.Msx-up7	413	KhC2:5772203-5772615	ggggacaagtttgtataataaagtaggctCTTGCGTCCTTGCAAACATAT	ggggaccactttgtatagaaaagttgggtGATCTAAAGGCCAACGAACTC	CiMsxb_upstream1	BP reaction with pDONR221-P3-P4	pSP72BSSPE-R3-ccdB/cmR-R4-bpFog-B5-B1-nlsLacZ-B2
			Ciinte.Msx-up8	319	KhC2:5772297-5772615	ggggacaagtttgtataataaagtaggctGCCGCGACGTCGACGAAG	ggggaccactttgtatagaaaagttgggtGATCTAAAGGCCAACGAACTC	CiMsxb_upstream1	BP reaction with pDONR221-P3-P4	pSP72BSSPE-R3-ccdB/cmR-R4-bpFog-B5-B1-nlsLacZ-B2
			Ciinte.Msx-up9	350	KhC2:5772203-5772552	ggggacaagtttgtataataaagtaggctCTTGCGTCCTTGCAAACATAT	ggggaccactttgtatagaaaagttgggtCACTCAACATTAATAATCAGTTG	CiMsxb_upstream1	BP reaction with pDONR221-P3-P4	pSP72BSSPE-R3-ccdB/cmR-R4-bpFog-B5-B1-nlsLacZ-B2
			Ciinte.Msx-up10	291	KhC2:5772203-5772493	CTTGCGTCCTTGCAAACATAT	GATATTCGGGTCATAAAAGTGAAT	CiMsxb_upstream1	pCR8/GW/TOPO TA cloning	pSP1.72-RfA-bpFOG-nlsLacZ
			Ciinte.Msx-up11	231	KhC2:5772203-5772433	ggggacaagtttgtataataaagtaggctCTTGCGTCCTTGCAAACATAT	ggggaccactttgtatagaaaagttgggtGACGTCATATGCTGCCAGGG	CiMsxb_upstream1	BP reaction with pDONR221-P3-P4	pSP72BSSPE-R3-ccdB/cmR-R4-bpFog-B5-B1-nlsLacZ-B2
Phallusia mammillata CRMs (MTP2014 assembly)
Nkxtun3		Phmamm.g00009312 ; Phmamm.g00009313	Phmamm.Nkxtun3-A	7190	S486:68183-75372	CCAACAGGCCCGAGTATTGT	AGTCTGACTGCGCATAATCAC	genomic DNA	pCR8/GW/TOPO TA cloning	pSP1.72-RfA-bpFOG-nlsLacZ
			Phmamm.Nkxtun3-A1	2525	S486:68183-70707	CCAACAGGCCCGAGTATTGT	TGGTATAGAATGCGGCTTTGG	PmNkxCA	pCR8/GW/TOPO TA cloning	pSP1.72-RfA-bpFOG-nlsLacZ
			Phmamm.Nkxtun3-A2	1891	S486:70687-72577	CCAAAGCCGCATTCTATACCA	CTTGGGGCGGATGTCTCTAT	PmNkxCA	pCR8/GW/TOPO TA cloning	pSP1.72-RfA-bpFOG-nlsLacZ
			Phmamm.Nkxtun3-A3	2815	S486:72558-75372	ATAGAGACATCCGCCCCAAG	AGTCTGACTGCGCATAATCAC	PmNkxCA	pCR8/GW/TOPO TA cloning	pSP1.72-RfA-bpFOG-nlsLacZ
			Phmamm.Nkxtun3-A3.1	1624	S486:73749-75372	AACCCTTGGGCGTTGATAGA	AGTCTGACTGCGCATAATCAC	PmNkxCA	pCR8/GW/TOPO TA cloning	pSP1.72-RfA-bpFOG-nlsLacZ
			Phmamm.Nkxtun3-A3.3	630	S486:74743-75372	ATAACCACCTCGCCTGACTG	AGTCTGACTGCGCATAATCAC	PmNkxCA	pCR8/GW/TOPO TA cloning	pSP1.72-RfA-bpFOG-nlsLacZ
Dlx.c		Phmamm.g00013699	Phmamm.Dlx.c-A	5394	S1105:23947-29340	CACAAAGTCTGAGGCACAACG	TGATCACGGTCTGGCTATGC	genomic DNA	pCR8/GW/TOPO TA cloning	pSP1.72-RfA-bpFOG-nlsLacZ
			Phmamm.Dlx.c-A1.1	625	S1105:23947-24571	CACAAAGTCTGAGGCACAACG	CGATCACCCGTGCAGATTA	PmDllCA	pCR8/GW/TOPO TA cloning	pSP1.72-RfA-bpFOG-nlsLacZ
			Phmamm.Dlx.c-A1.2	1479	S1105:23947-25425	CACAAAGTCTGAGGCACAACG	GATGGAAAGAGGCAGCAGAA	PmDllCA	pCR8/GW/TOPO TA cloning	pSP1.72-RfA-bpFOG-nlsLacZ
			Phmamm.Dlx.c-A3.1	1205	S1105:28136-29340	CGGTTGACCCGAGAAATTAG	TGATCACGGTCTGGCTATGC	PmDllCA	pCR8/GW/TOPO TA cloning	pSP1.72-RfA-bpFOG-nlsLacZ
			Phmamm.Dlx.c-A3.2	1034	S1105:28307-29340	TCTATCCACCACGCGTACAA	TGATCACGGTCTGGCTATGC	PmDllCA	pCR8/GW/TOPO TA cloning	pSP1.72-RfA-bpFOG-nlsLacZ
Klf1/2/4		Phmamm.g00006245	Phmamm.Klf1/2/4-A	6736	S258:17730-24465	TCGGTACGCAACGATACGAG	CAACGGGATTACAAGCTCGC	genomic DNA	pCR8/GW/TOPO TA cloning	pSP1.72-RfA-bpFOG-nlsLacZ
			Phmamm.Klf1/2/4-A1	2749	S258:21711-24459	CGCAACGATACGAGGACAGT	CCCCTTTCAATTGCGAGCAC	PmKLFA	pCR8/GW/TOPO TA cloning	pSP1.72-RfA-bpFOG-nlsLacZ
			Phmamm.Klf1/2/4-A2	2276	S258:19764-22039	CGATACTTGCAAAACGTTCTGTG	GAAGTAGCCCTGACTCTGCG	PmKLFA	pCR8/GW/TOPO TA cloning	pSP1.72-RfA-bpFOG-nlsLacZ
			Phmamm.Klf1/2/4-A3	2511	S258:17840-20350	CCGGGATATAAGTTGGGGCA	TTGAAGTGCGTAACGACCCA	PmKLFA	pCR8/GW/TOPO TA cloning	pSP1.72-RfA-bpFOG-nlsLacZ
			Phmamm.Klf1/2/4-A3.1	1361	S258:18268-19628	TTCTCAAGTCGCTGGCTCTG	GCCTTCGCTTCAACCCAAAT	PmKLFA3	pCR8/GW/TOPO TA cloning	pSP1.72-RfA-bpFOG-nlsLacZ
Tox		Phmamm.g00011803	Phmamm.Tox-A	1093	S765:64113-65205	AAACTGTGGCGGTAGAGACG	CGGCACGAGGGGATGTAATG	genomic DNA	pCR8/GW/TOPO TA cloning	pSP1.72-RfA-bpFOG-nlsLacZ
			Phmamm.Tox-A1	657	S765:64113-64769	AAACTGTGGCGGTAGAGACG	GTTTTCCGGGGCATACTGTT	PmCAGF9A	pCR8/GW/TOPO TA cloning	pSP1.72-RfA-bpFOG-nlsLacZ
			Phmamm.Tox-A1.1	240	S765:64368-64607	AATTCGCTCAGGTCGTGTTT	AACAGTTCCGACCAAATCTGA	PmCAGF9A	pCR8/GW/TOPO TA cloning	pSP1.72-RfA-bpFOG-nlsLacZ
			Phmamm.Tox-A2	533	S765:64671-65203	GCCGCATTTGAACAAAAAG	GCACGAGGGGATGTAATGTT	PmCAGF9A	pCR8/GW/TOPO TA cloning	pSP1.72-RfA-bpFOG-nlsLacZ
Ascl.b		Phmamm.g00005436	Phmamm.Ascl.b-A	1819	S210:164641-166459	CTCGCAATTCCTGAACATCA	TAGGTCACGCCCATGAAAAT	genomic DNA	pCR8/GW/TOPO TA cloning	pSP1.72-RfA-bpFOG-nlsLacZ
			Phmamm.Ascl.b-B	2308	S210:168491-170798	AACATCTGCTCGTAACACCG	TGCCTATCTGCCATCCATGC	genomic DNA	pCR8/GW/TOPO TA cloning	pSP1.72-RfA-bpFOG-nlsLacZ
Bhlhtun1		Phmamm.g00003275	Phmamm.Bhlhtun1-A	6267	S104:146399-152665	GAAGCCGTTTGTTTGGTTCG	TACTGCGTCACCTACTCTCG	genomic DNA	pCR8/GW/TOPO TA cloning	pSP1.72-RfA-bpFOG-nlsLacZ
Msx		Phmamm.g00005895	Phmamm.Msx-UP	2359	S236:167586-169944	AAGTCGTGTTAGCAGTGGTG	CGTCGTTTTCTCTCGTCTGC	genomic DNA	pCR8/GW/TOPO TA cloning	pSP1.72-RfA-bpFOG-nlsLacZ
			Phmamm.Msx-LED	590	S236:167586-168175	AAGTCGTGTTAGCAGTGGTG	CACAAACAGATTGTATGGCGT	genomic DNA	pCR8/GW/TOPO TA cloning	pSP1.72-RfA-bpFOG-nlsLacZ
			Phmamm.Msx-LED+UR	1657	S236:167586-169242	AAGTCGTGTTAGCAGTGGTG	TGCCCAGAACATGACACCTA	genomic DNA	pCR8/GW/TOPO TA cloning	pSP1.72-RfA-bpFOG-nlsLacZ
Halocynthia roretzi CRMs (MTP2014 assembly)
Nkxtun3		Harore.CG.MTP2014.S299.g13910	Harore.Nkxtun3-B	5086	S299:54687-59772	tccgtgcggaatatctaccc	aacccgcaagaaaacacctg	genomic DNA	pCR8/GW/TOPO TA cloning	pSP1.72-RfA-bpFOG-nlsLacZ
Tox		Harore.CG.MTP2014.S66.g11862	Harore.Tox-A	3935	S66:297117-301051	tgcgttttccgatttacgac	gccatctggcagtctgtttg	genomic DNA	pCR8/GW/TOPO TA cloning	pSP1.72-RfA-bpFOG-nlsLacZ
Msx		Harore.CG.MTP2014.S71.g09264	Harore.Msx-A	3307	S71:101748-105054	gcgtttcaaaatctgcgagt	cctgcaagcatcgatttacg	genomic DNA	pCR8/GW/TOPO TA cloning	pSP1.72-RfA-bpFOG-nlsLacZ
Phallusia fumigata CRM (MTP2014 assembly)
Msx		N.A.	Phfumi.Msx-up	3147	S143:27837-30983	TCGTTCGCATTTTGGTTGGG	CGTCGTCCTTACTCGTCTGC	genomic DNA	pCR8/GW/TOPO TA cloning	pSP1.72-RfA-bpFOG-nlsLacZ
Ascidia mentula CRM (no genome available)
Msx		N.A.	Asment.Msx-up	1502		GAATGATTTTGGAACTGGCA	CGTCACTTCGGTTCGTCT	genomic DNA	pCR8/GW/TOPO TA cloning	pSP1.72-RfA-bpFOG-nlsLacZ
