# Supplementary material for: Conservation of peripheral nervous system formation mechanisms in divergent ascidian embryos
Source: eLife journal article supplement (doi:10.7554/elife.59157), 2020-11-16
Supplement: supp [file elife-59157-supp-v1.zip › elife_poa_e59157_Supplementary_file_3.pdf]

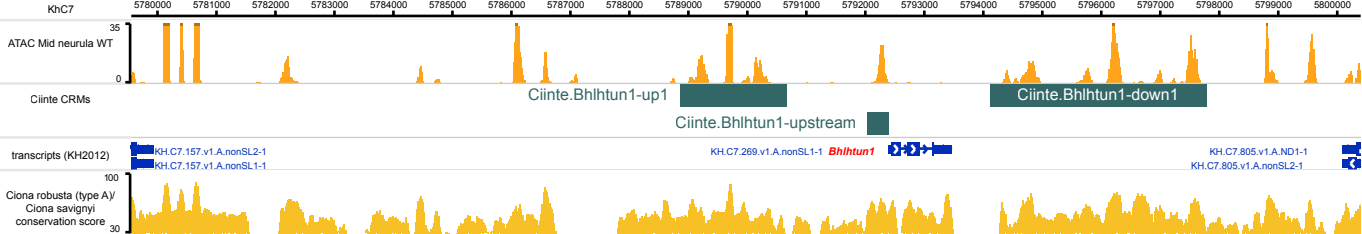

Ciinte.Bhlhtun1-upstream

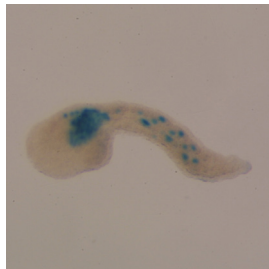

Ciinte.Bhlhtun1-up1

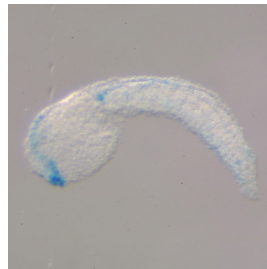

Ciinte.Bhlhtun1-down1

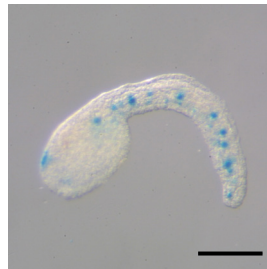

% of embryos stained in DML and VML

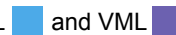

Ciinte.Bhlhtun1-upstream

(n=112, N=2)

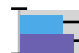

Ciinte.Bhlhtun1-up1

(n=165, N=2)

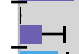

Ciinte.Bhlhtun1-down1

(n=105, N=2)

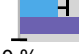

0 % 20 % 40 % 60 % 80 % 100 %
