# Supplementary material for: Conservation of peripheral nervous system formation mechanisms in divergent ascidian embryos
Source: eLife journal article supplement (doi:10.7554/elife.59157), 2020-11-16

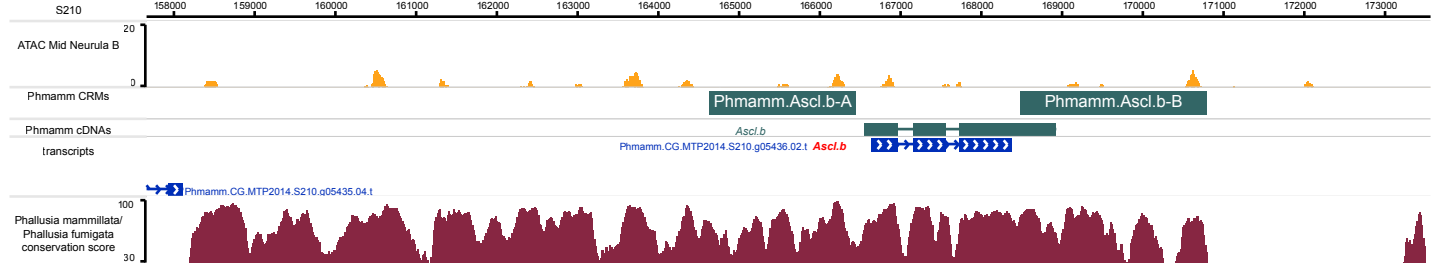

Phmmmm.Asc1.b-A

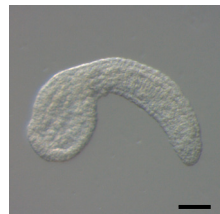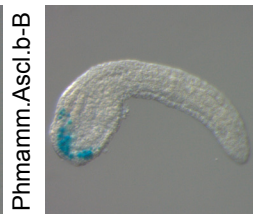

A (n=112, N=2)

B (n=165, N=2)

% of embryos stained in VDML

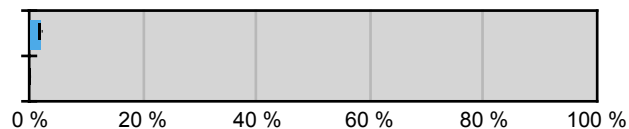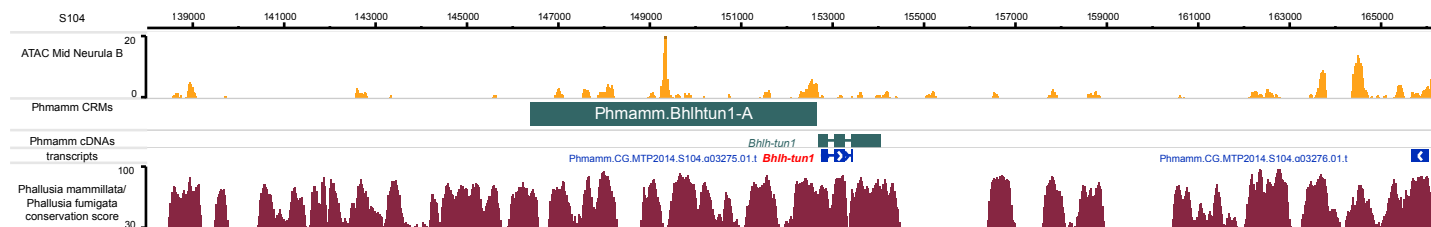

Phmmmm.Bhlhtun1-A

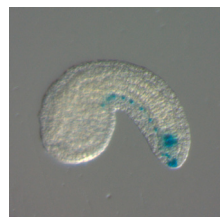

Phmmmm.Bhlhtun1-A (n=142, N=1)

% of embryos stained in VDML

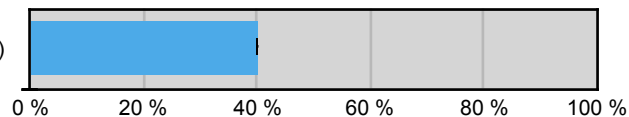

Supplement: supp [file elife-59157-supp-v1.zip › elife_poa_e59157_Supplementary_file_4.pdf]
