# Supplementary material for: Conservation of peripheral nervous system formation mechanisms in divergent ascidian embryos
Source: eLife journal article supplement (doi:10.7554/elife.59157), 2020-11-16
Supplement: supp [file elife-59157-supp-v1.zip › elife_poa_e59157_Supplementary_file_8.xlsx]

## Sheet: Feuil1
Gene name	Gene ID	Clone used for ISH	Vector	Forward primer	Reverse primer
Phallusia mammillata cDNAs
Msx	Phmamm.g00005895	AHC0AAA214YL10	pExpress1
Ascl.b	Phmamm.g00005436	AHC0AAA113YL17	pExpress1
Klf1/2/4	Phmamm.g00006245	AHC0AAA201YO05	pExpress1
Nkxtun3	Phmamm.g00009312 ; Phmamm.g00009313	AHC0AAA51YN19	pExpress1
Tox	Phmamm.g00011803	AHC0AAA261YD12	pExpress1
Dlx.c	Phmamm.g00013699	RT-PCR generated	pGEM-T-easy	CGGAAAGCCAAATGAGTGCT	TCCAACTACTTCGAAACACCA
Bhlh-tun1	Phmamm.g00003275	AHC0AAA36YJ07	pExpress1
Dlk	Phmamm.g00007721	AHC0AAA62YG24	pExpress1
Pou4F	Phmamm.g00008914	AHC0AAA33YA19	pExpress1
Atonal	Phmamm.g00006462	AHC0AAA51YI16	pExpress1
Celf3.a	Phmamm.g00007762	AHC0AAA212YP22	pExpress1
Halocynthia roretzi DNAs
Msx	Harore.g00009264	genomic PCR	pGEM-T-easy	GATCCGGAAAAATCGGACAA	ATCTTCCCGGGGTAAAAGGA
Ascl.b	Harore.g00010610	genomic PCR	pGEM-T-easy	CACACTGCAGTCAGCGATAGAA	AGCAGGTGGACTGTGCTGAA
Klf1/2/4	Harore.g00000202	man5l03	pBSK
Nkxtun3	Harore.g00013910	genomic PCR	pGEM-T-easy	CGACGAACAAAATGGAAACG	TGTCGTGTGCATATGGCGTA
Tox	Harore.g00011862	ma148n07	pBSK
Dlx.c	Harore.g00012462	genomic PCR	pGEM-T-easy	ACAATCCGATGCTTCCGTCT	TCCTTGAGGATTGTGCTGGA
Dlk	Harore.g00013934	ma328e15	pCMVFL3
Celf3.a	Harore.g00002306	ma164l05	pBSK
Molgula appendiculata cDNAs
Msx		RT-PCR generated	pGEM-T-easy	TTGCATAACAACGTGACAGA	TTAACATACAATATGTAGACTTCAC
Ascl.bα		RT-PCR generated	pGEM-T-easy	TCCAACCGCTGATATGCCTT	GTCAGGGCAATGCTTGAACC
Ascl.bβ		RT-PCR generated	pGEM-T-easy	GCAACAAAATGAAAGTAGAATATGG	GACAATTATTGTTGCTTAAAATTTAG
Klf1/2/4		RT-PCR generated	pGEM-T-easy	TCACCGATGTTTAATCTGTGTTATT	CTCCGCGAGAAGATGGACTT
Nkxtun3		RT-PCR generated	pGEM-T-easy	ATGAGTAGTTTAAGTATGGGGAGAA	TGTGCAATCAGTGTGTCACAAAA
Tox		RT-PCR generated	pGEM-T-easy	TCATCTATCAACAGACACGCA	GTGGTAGCTTGGGAGACGAA
Dlx.c		RT-PCR generated	pGEM-T-easy	GTGAAACAGAAAACAGGCACT	ATTTGGTGGGAAGGCGGTAG
Dlk		RT-PCR generated	pGEM-T-easy	AAGACAAAACTTGTGCCGCC	AGCGACGTTGTAGTTACATGC
Celf3.a		RT-PCR generated	pGEM-T-easy	ACGAGTAGACGAGCTGTGAGA	CGTTTTCAAGCATCACAGCCA
