# Supplementary material for: Conservation of peripheral nervous system formation mechanisms in divergent ascidian embryos
Source: eLife journal article supplement (doi:10.7554/elife.59157), 2020-11-16
Supplement: supp [file elife_poa_e59157_Figure_3_figure_supplement_4.pdf › elife_poa_e59157_Figure_3_figure_supplement_4.pdf]

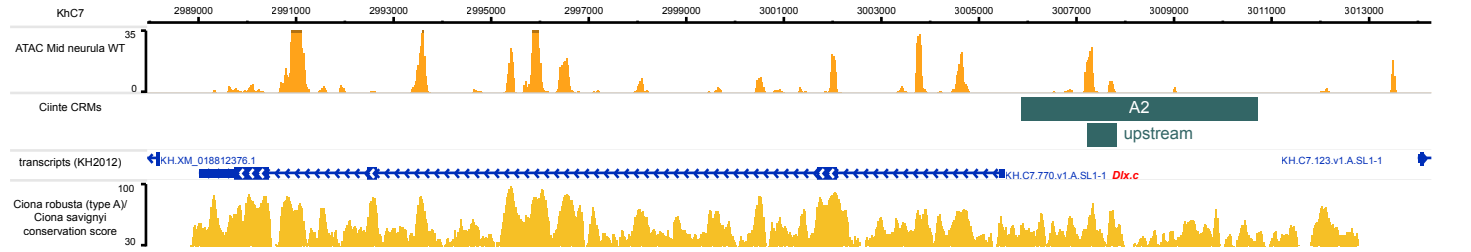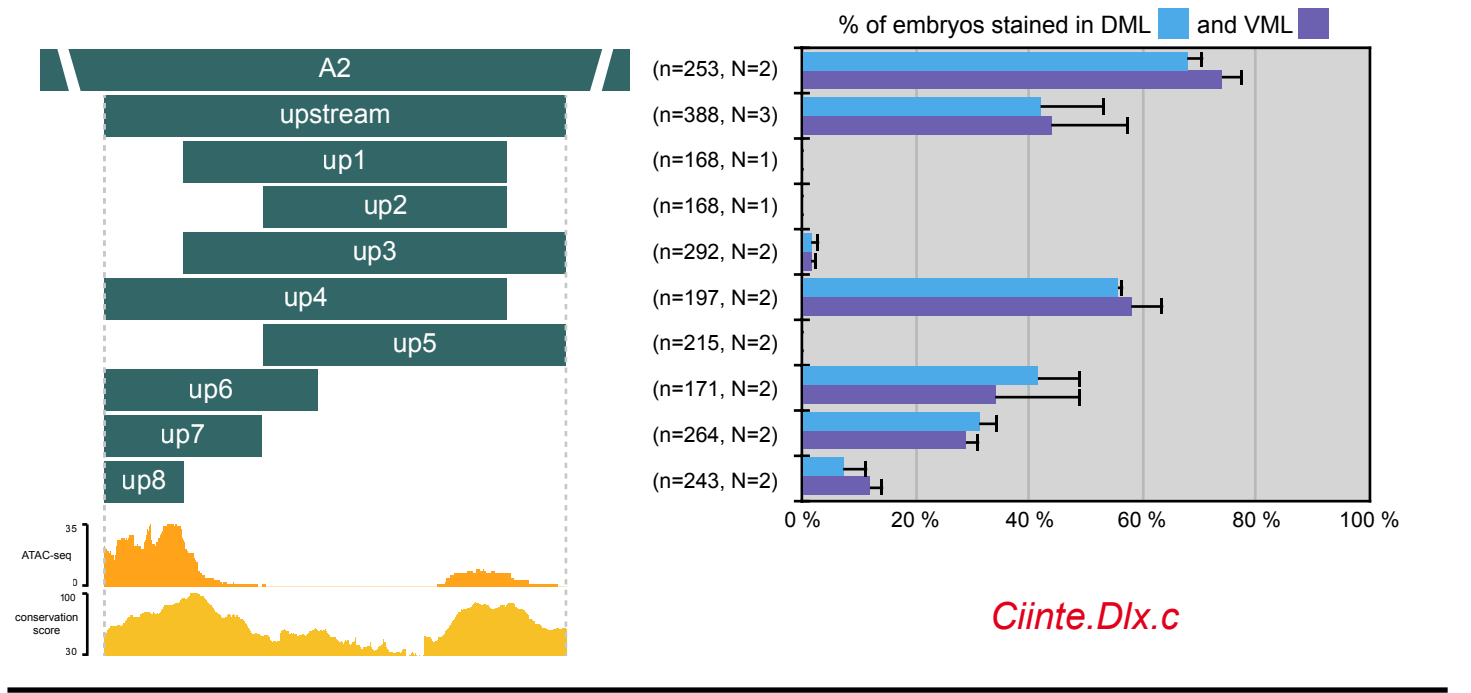

Ciinte.Dlx.c-up4

Ciinte

TCGGTGCTTTGTGCGCCACTTTGTTTGT

Cisavi

TCGGTGATTTGTGCGCAATTGATTTGT

Ciinte

GCTCGATGCCGCATCAAACCACCTTTAACTCGCCATTAGCGCAACGCGGGTGACGCTTC

Cisavi

GGGCGGTTTCGAATCTCCTTGAACCTCCCATTAGTGATGACATGGTAACGCATT

Ciinte

ACTAATACTCCGCACCACCAAGCACGAGGTGT

Cisavi

GGATCTGTGACTGTGAAAGATGGAGCACTGTAACACCCTCATAAGCGAGACGCTCTGGGA

Ciinte

ATGAATGTATACTGGAATATTAAGATCGGCGAAATGGGTGTTTTTCAGGAC

Cisavi

ACGGTGGATCGGTAACAAGGTACGTGTAAAGAGGCATTGGGAAGATATTGGACAAAT

Ciinte

ATTTGGGATGTTTTTTGTCCGTGTGCTTGCGGTAGCGTAAAAGGTCCGTC

Cisavi

ACTCGACATGTTTGTAGCCTTGTTTCGATTTGAGTGAAGGTTATTTTATTTGTTAT

Ciinte

AAAAATGCGTCATTCCGCGTCCGTAATTAACCACGGCGATGGTTTTTT

Cisavi

AATTAACTAAAAATGTATATTTTAAATAATATAGGACCGTGAAAATGCTTGT

Ciinte

CGATTAAGATTGGAAATCGAAGCGACTTTACGCC

Cisavi

GTTAACTAGAAATGTGTTTTAGATGCCGGCTAATTGCGATGGGACTTTACGATTTC

Ciinte

AGTCGCCGAAAACGGAGCCGTATCCATATAGGAT

Cisavi

AGGTTTCGATAGGAACGCAAAATTCAGATCGGCTTCAAATCAACCCAGCCCTGTGGGAT

Ciinte

ATGATGCAGGCCGATAGAAACATGACTTCTGAAAAATAAACAAACCTTCAGCCGATGCCG

Cisavi

ATGATGCAAGTCGATAGAAATACGACTTCTGAAAAATAAACAAACTTTGGTCCGCCAACT

Ciinte

CCCTTTGAAGACGCCGAGCTGCCGCGGGCTAGAAAGCGAGACGGAGGTATAGGCGGCGGA

Cisavi

CGCTTTGAAGAGGCCGACATGCCCCGGGCAAGAAAACGAGACGGCCAAGGCGAATGG

Ciinte

AAAGCGTAGAAAAAATGG

Cisavi

AGAAAGGAGAAAAAATGG

Region required for VDML expression  
(deleted in up1)

Ciinte.Dlx.c-up7

Putative regulators:

- Msx
- Klf1/2/4
- Nkxtun3
- Dlx.c
