# Supplementary material for: Conservation of peripheral nervous system formation mechanisms in divergent ascidian embryos
Source: eLife journal article supplement (doi:10.7554/elife.59157), 2020-11-16

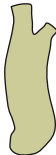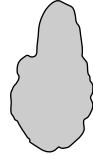

*Msx*  
*Ascl.b*  
*Klf1/2/4*  
*Nkxtun3*  
*Tox*  
*Dlx.c*

|                       |              |
|-----------------------|--------------|
| Ciinte.Msx-Intergenic | (n=711, N=3) |
| Ciinte.Ascl.b-do1     | (n=439, N=2) |
| Ciinte.Klf1/2/4-up1   | (n=662, N=2) |
| Ciinte.Nkxtun3-A      | (n=904, N=2) |
| Ciinte.Nkxtun3-up7    | (n=394, N=2) |
| Ciinte.Tox-int1       | (n=707, N=2) |
| Ciinte.Dlx.c-A2       | (n=334, N=2) |

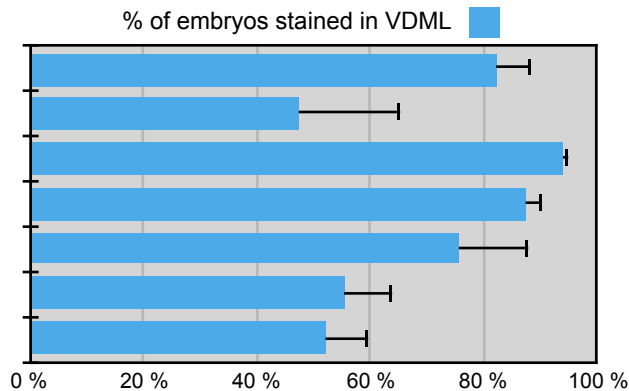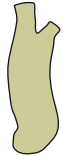

*Msx*  
*Klf1/2/4*  
*Nkxtun3*  
*Tox*  
*Dlx.c*

|                     |              |
|---------------------|--------------|
| Phmamm.Msx-UP       | (n=309, N=3) |
| Phmamm.Klf1/2/4-A   | (n=742, N=2) |
| Phmamm.Klf1/2/4-A3  | (n=244, N=1) |
| Phmamm.Nkxtun3-A    | (n=526, N=3) |
| Phmamm.Nkxtun3-A1   | (n=577, N=2) |
| Phmamm.Nkxtun3-A3   | (n=206, N=2) |
| Phmamm.Nkxtun3-A3.1 | (n=475, N=1) |
| Phmamm.Tox-A        | (n=364, N=2) |
| Phmamm.Tox-A1       | (n=383, N=2) |
| Phmamm.Tox-A1.1     | (n=101, N=2) |
| Phmamm.Dlx.c-A      | (n=459, N=2) |
| Phmamm.Dlx.c-A3.2   | (n=317, N=2) |

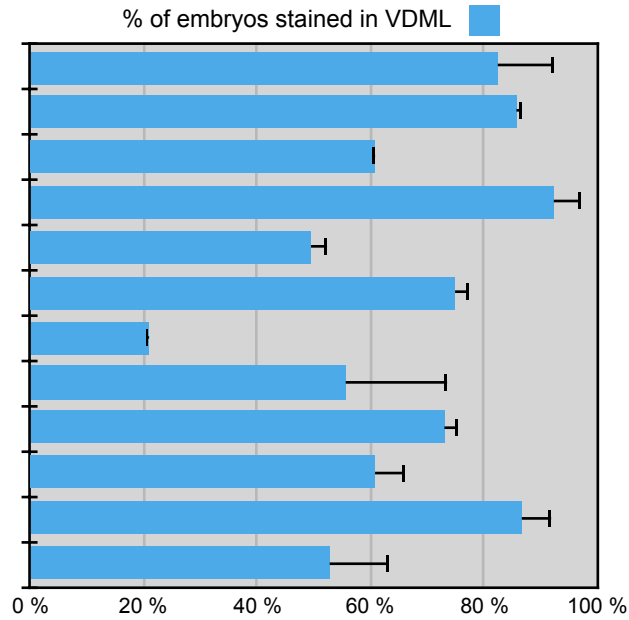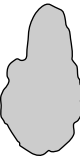

Supplement: supp [file elife_poa_e59157_Figure_6_figure_supplement_1.pdf › elife_poa_e59157_Figure_6_figure_supplement_1.pdf]
