# Supplementary figures and images for: Conservation of peripheral nervous system formation mechanisms in divergent ascidian embryos
Source: eLife journal article supplement (doi:10.7554/elife.59157), 2020-11-16

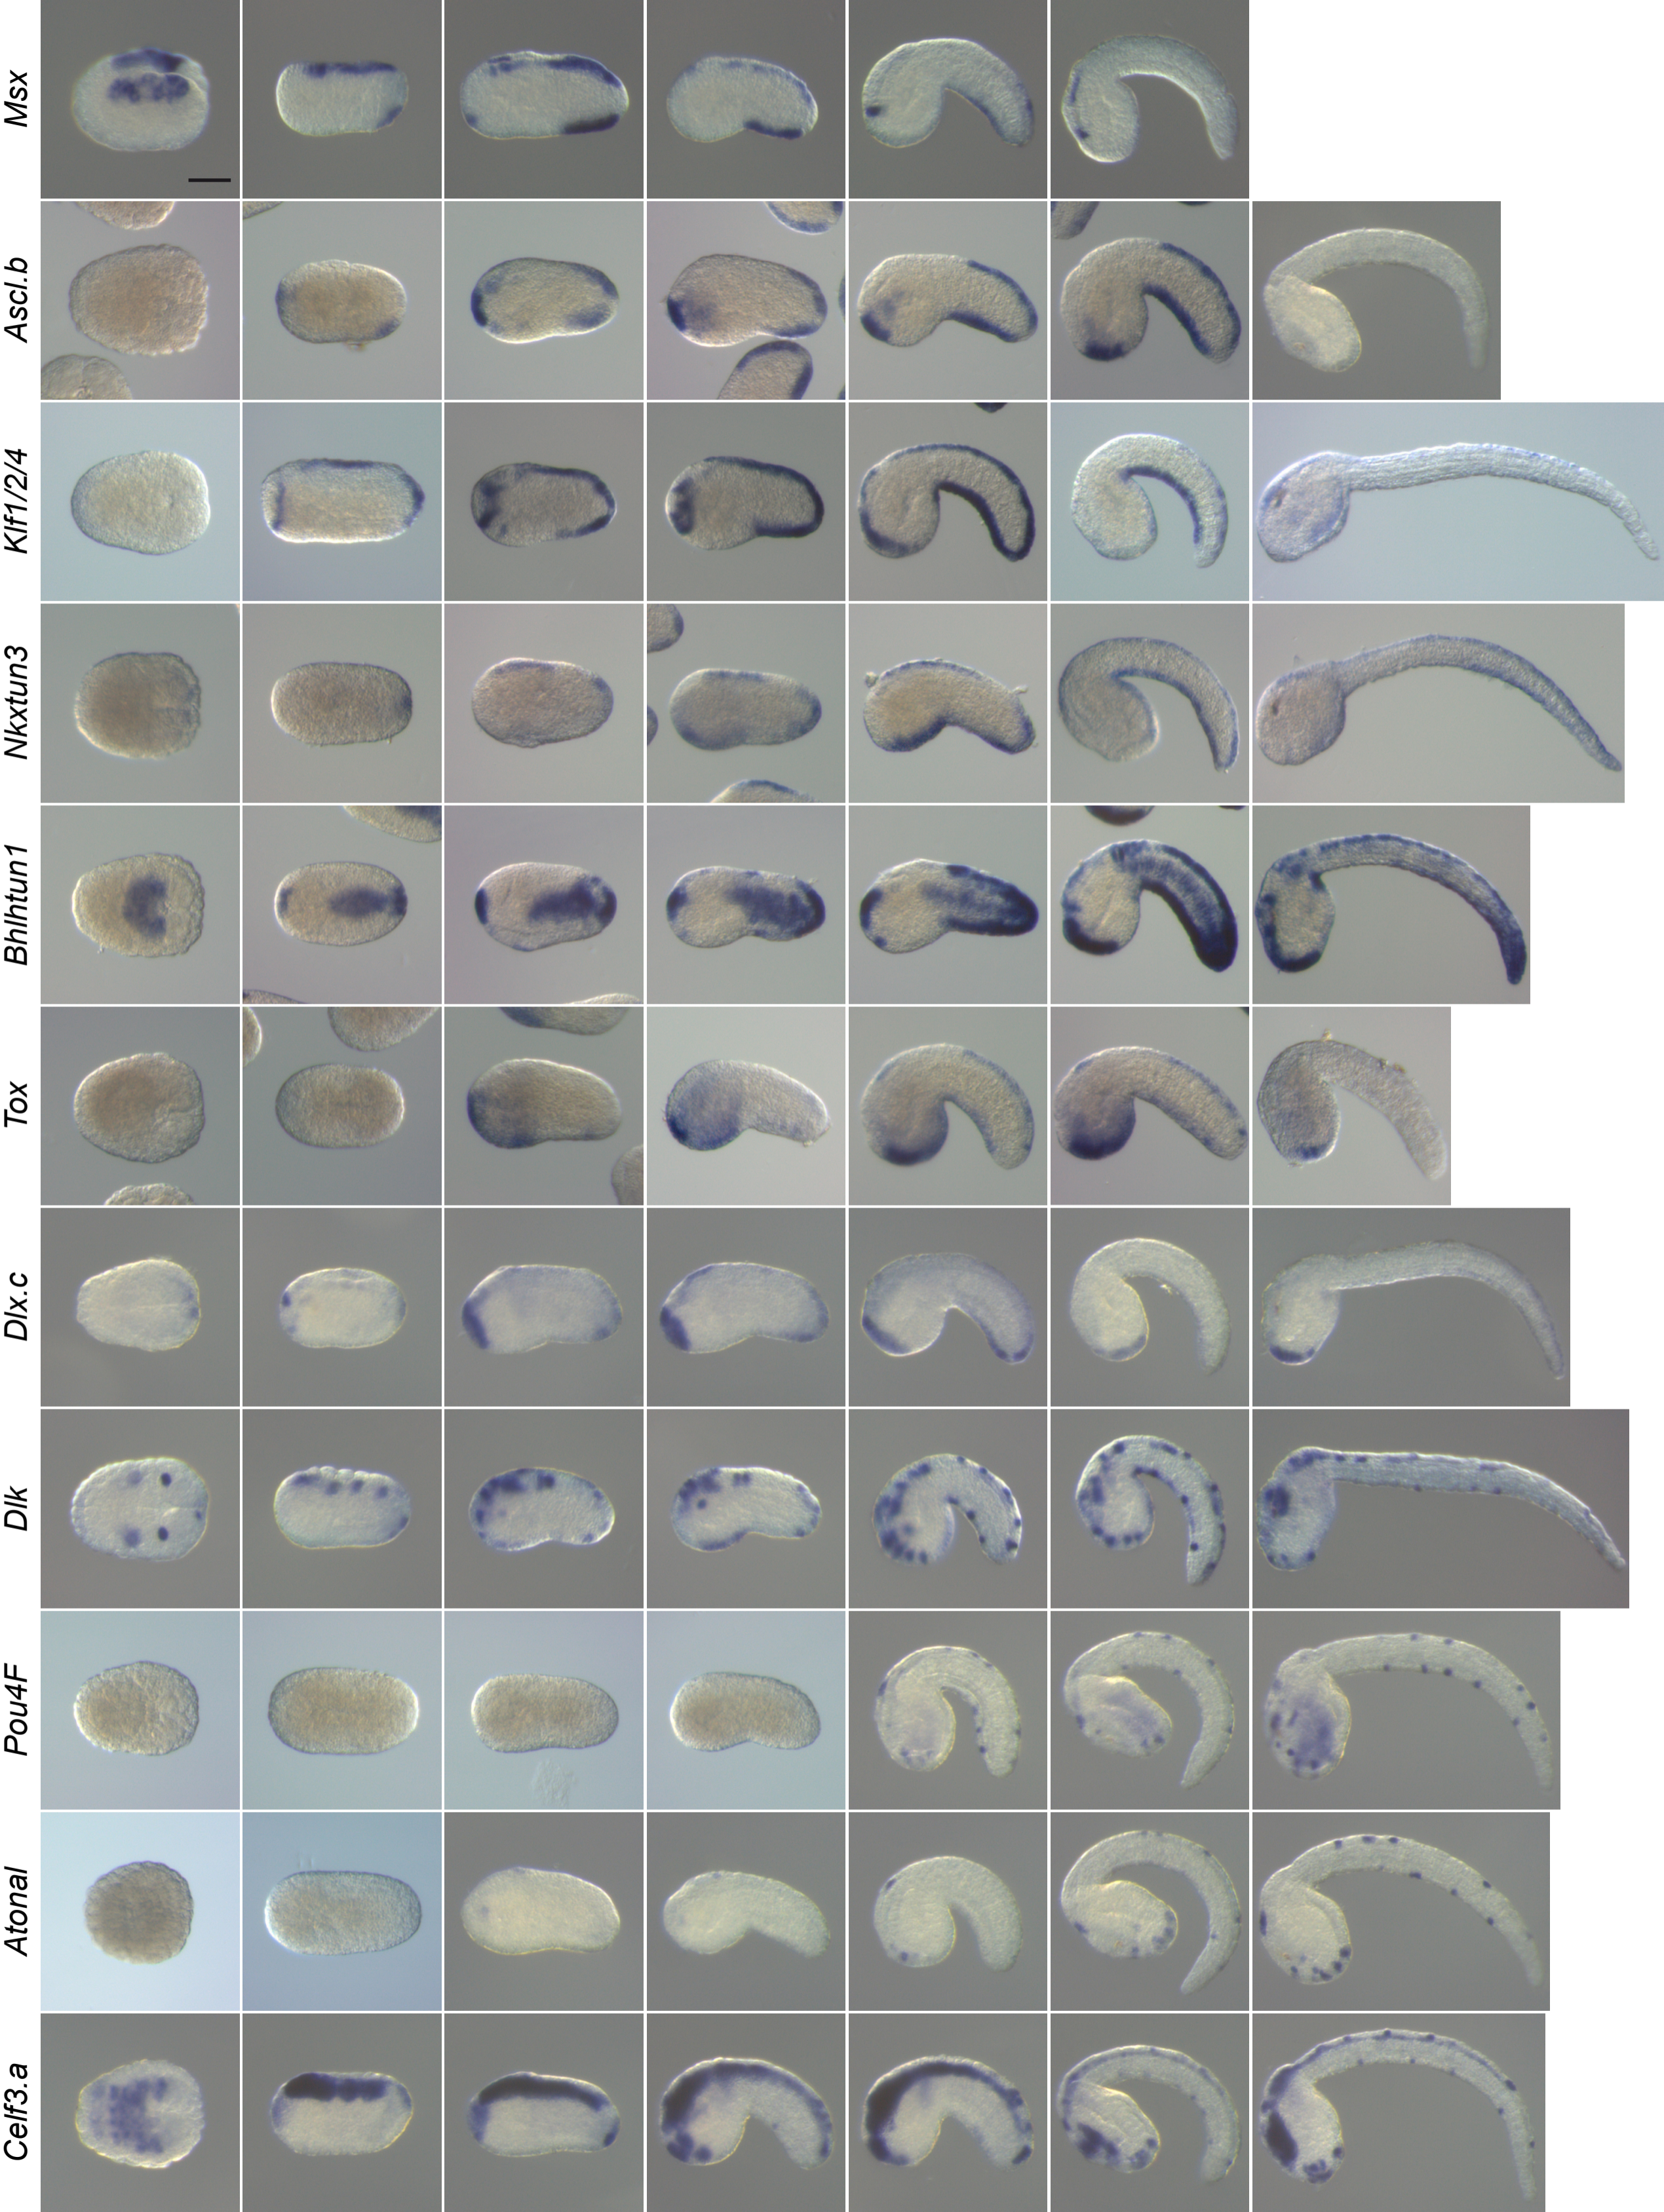

Supplement: supp [file elife-59157-supp-v1.zip › elife_poa_e59157_Figure_4_figure_supplement_1.pdf]

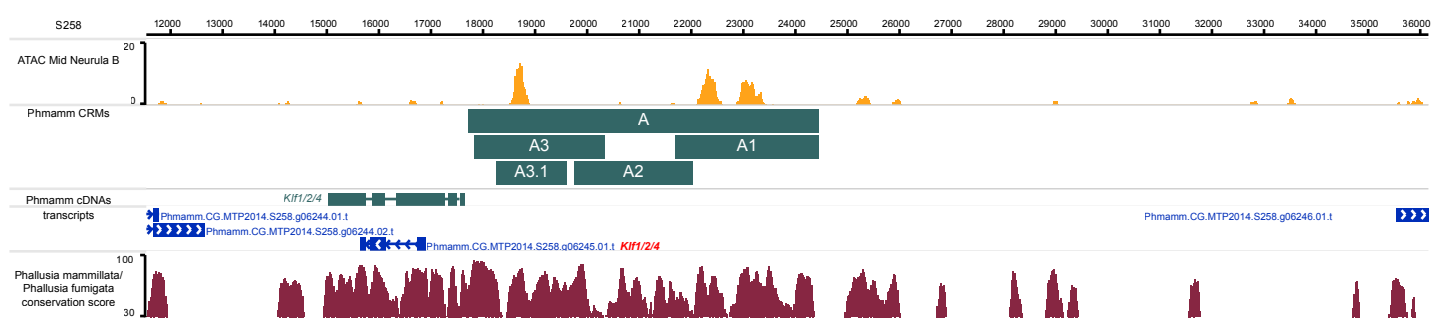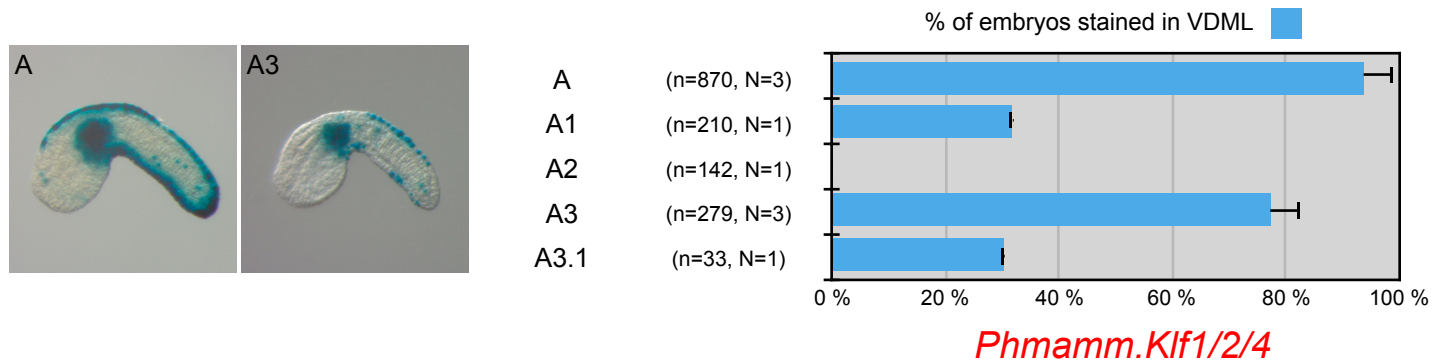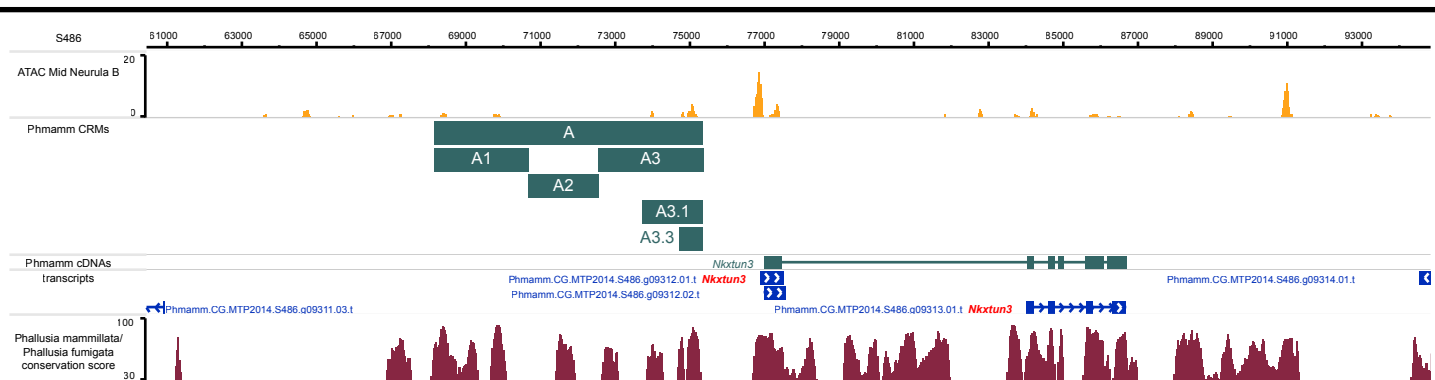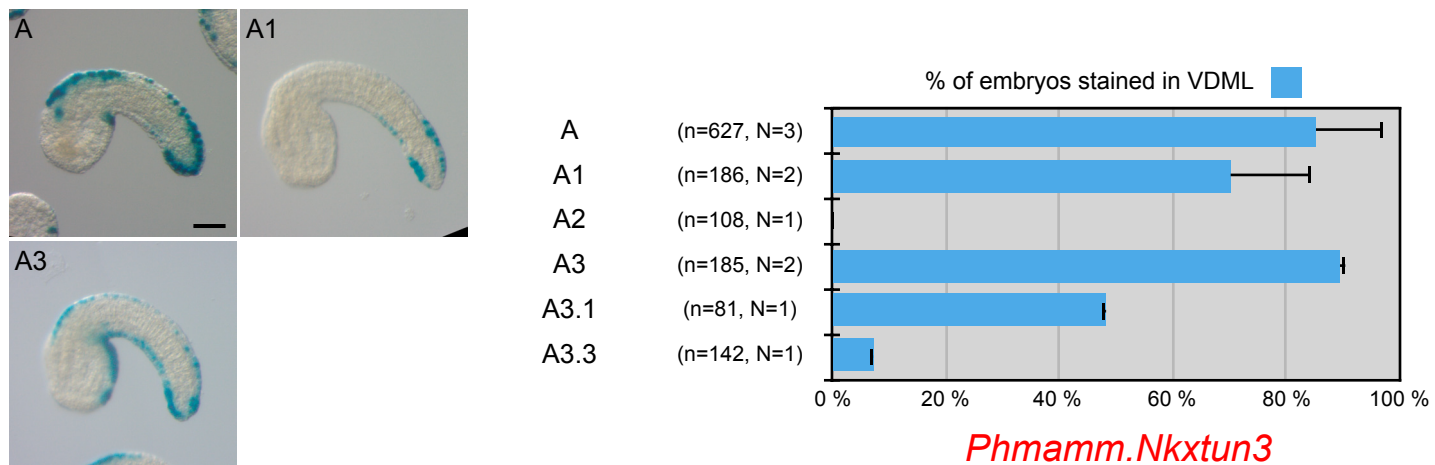

Supplement: supp [file elife-59157-supp-v1.zip › elife_poa_e59157_Figure_5_figure_supplement_2.pdf]

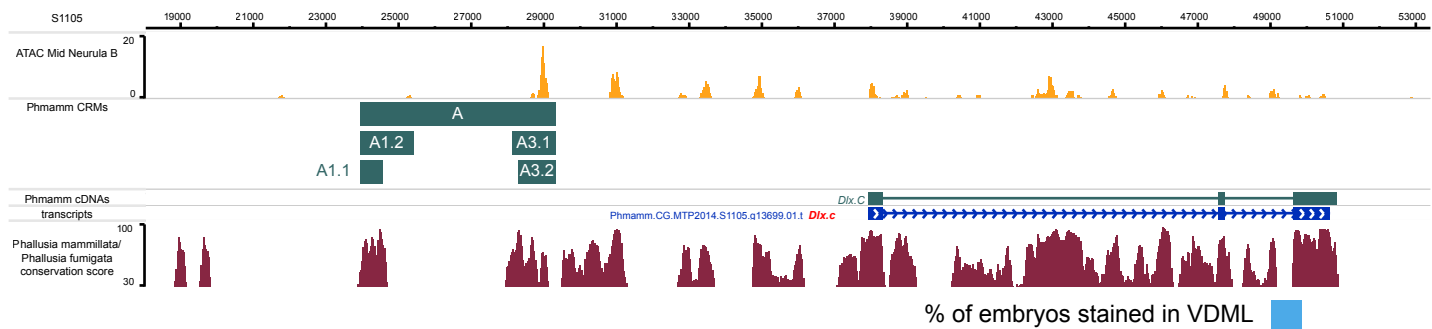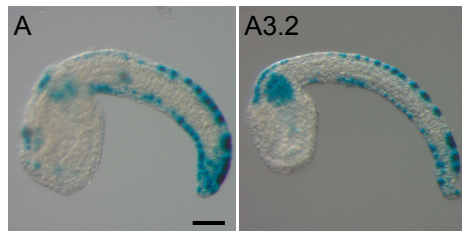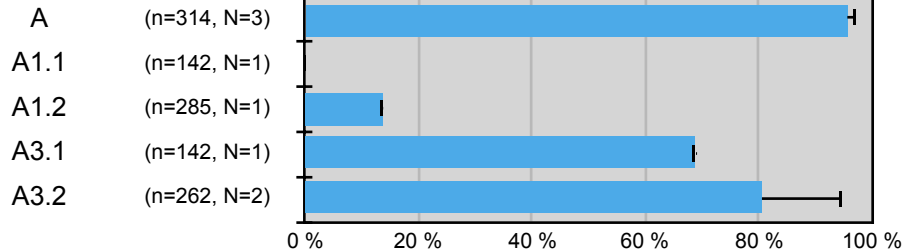

*Phmamm.Dlx.c*

Supplement: supp [file elife-59157-supp-v1.zip › elife_poa_e59157_Figure_5_figure_supplement_4.pdf]

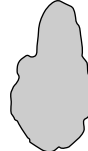

% of embryos stained in VDM

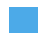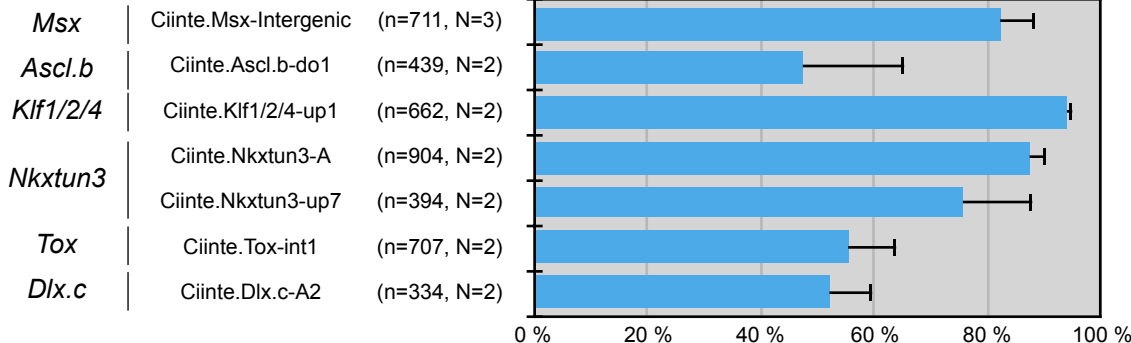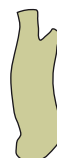

% of embryos stained in VDM

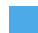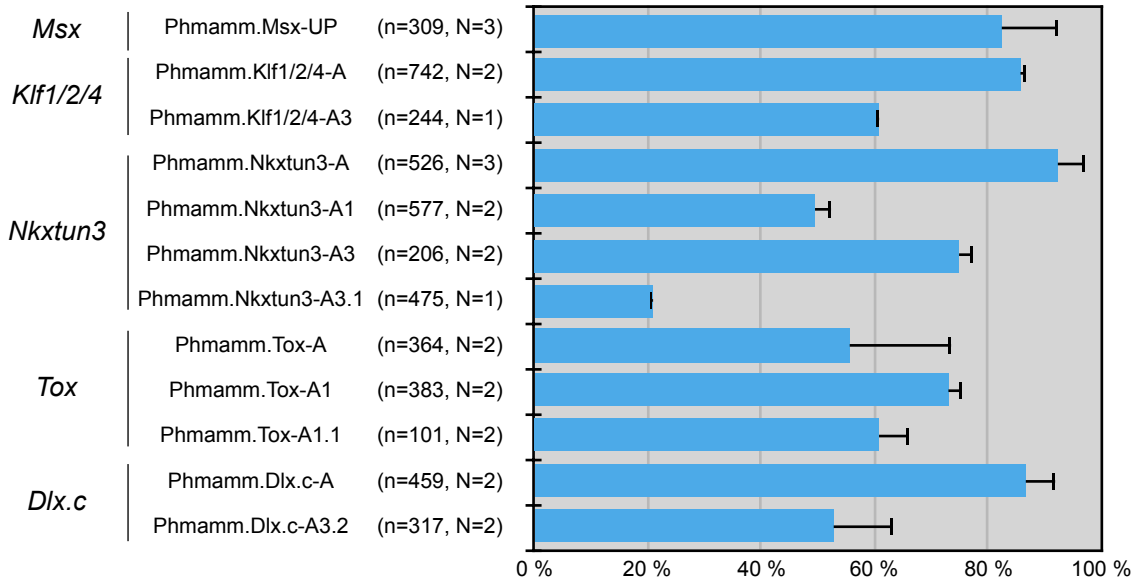

Supplement: supp [file elife-59157-supp-v1.zip › elife_poa_e59157_Figure_6_figure_supplement_1.pdf]

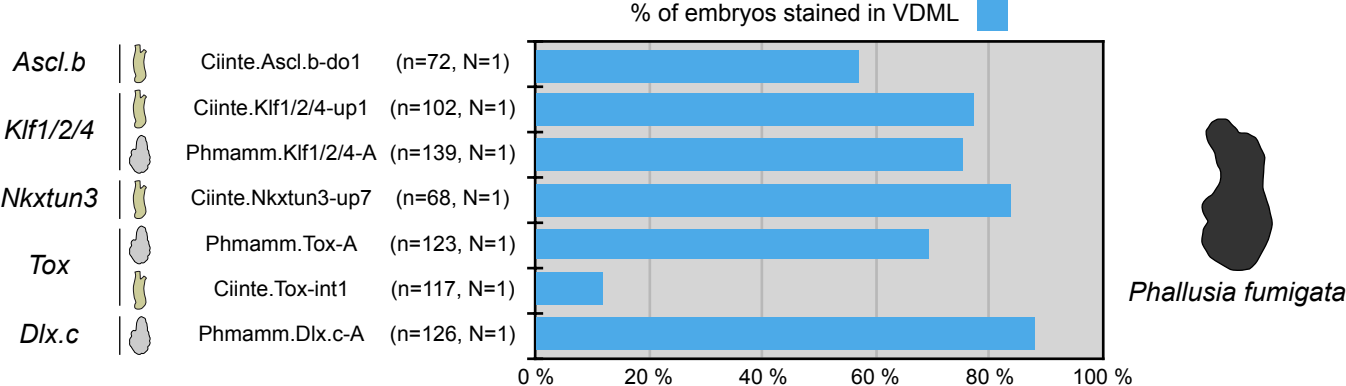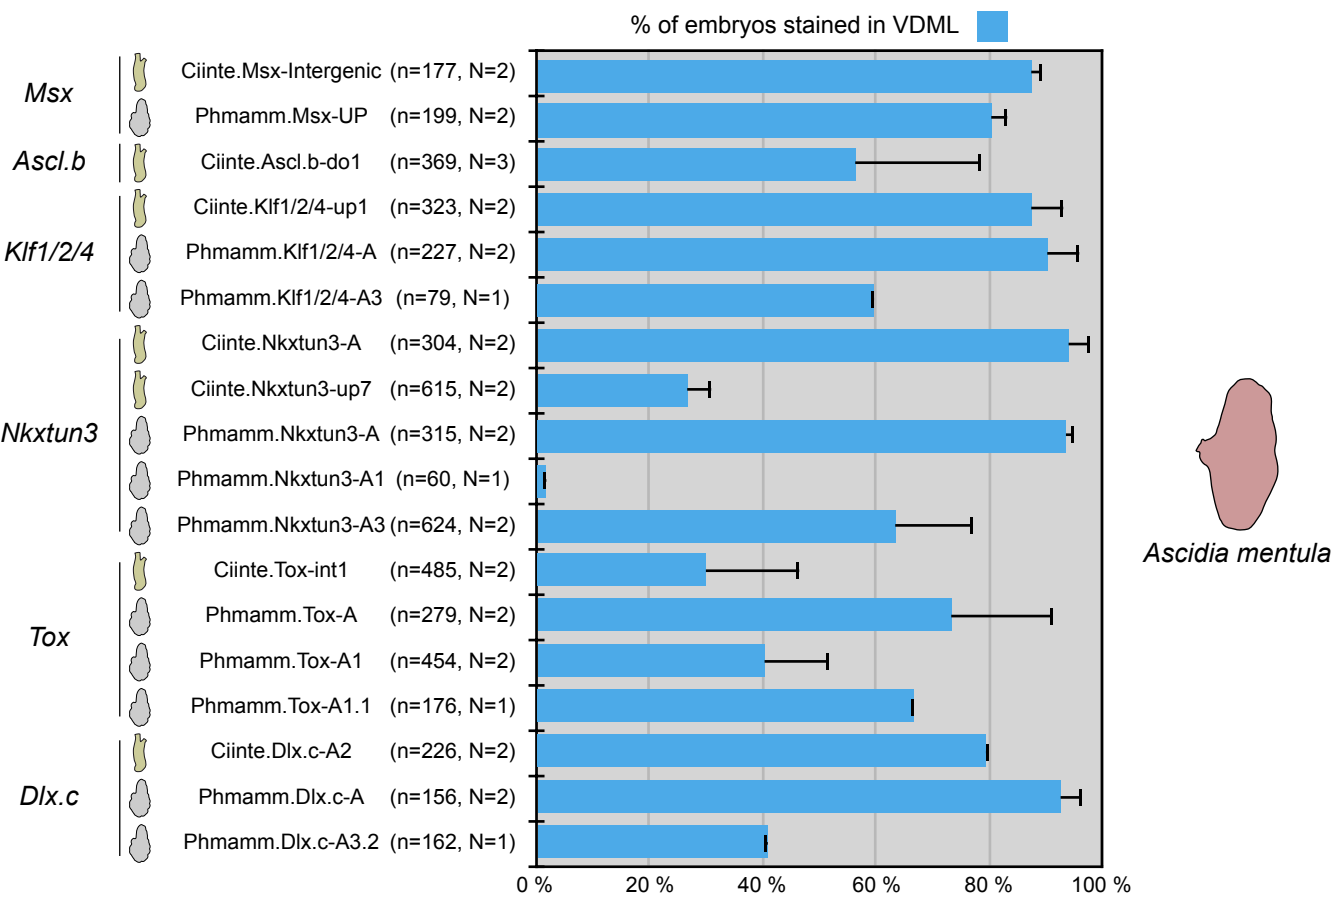

Supplement: supp [file elife-59157-supp-v1.zip › elife_poa_e59157_Figure_6_figure_supplement_2.pdf]

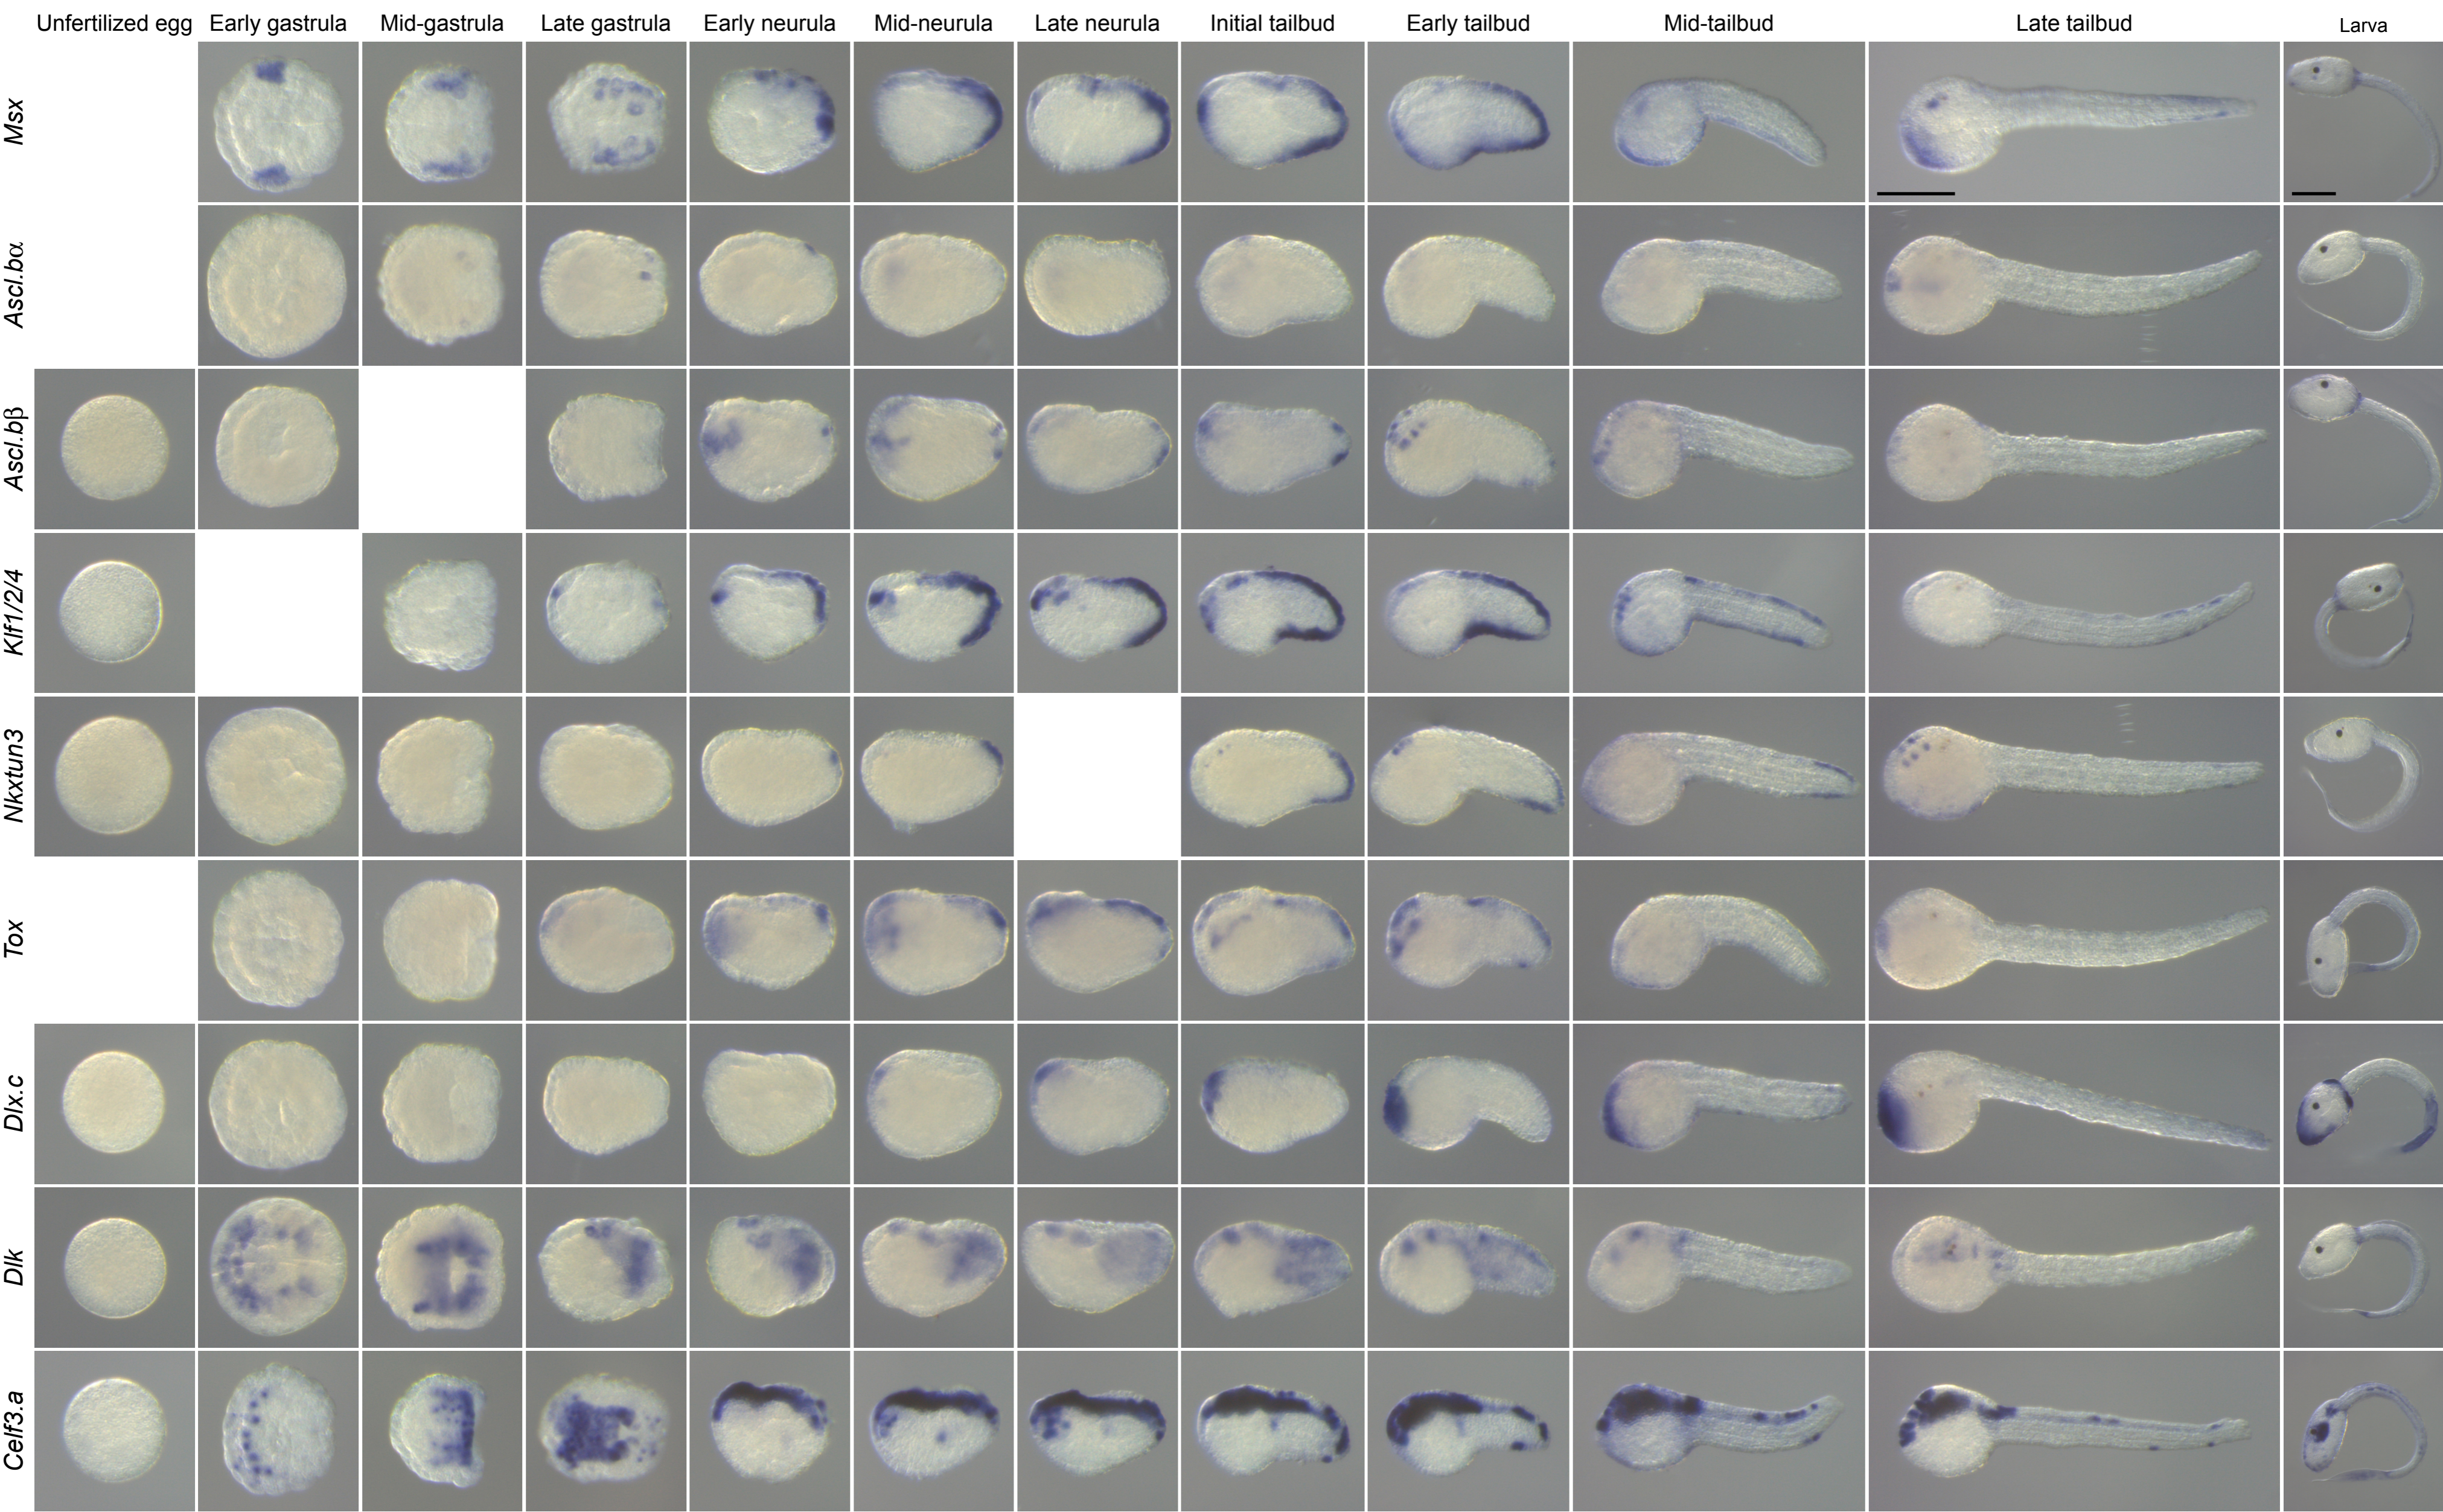

Supplement: supp [file elife-59157-supp-v1.zip › elife_poa_e59157_Figure_8_figure_supplement_1.pdf]

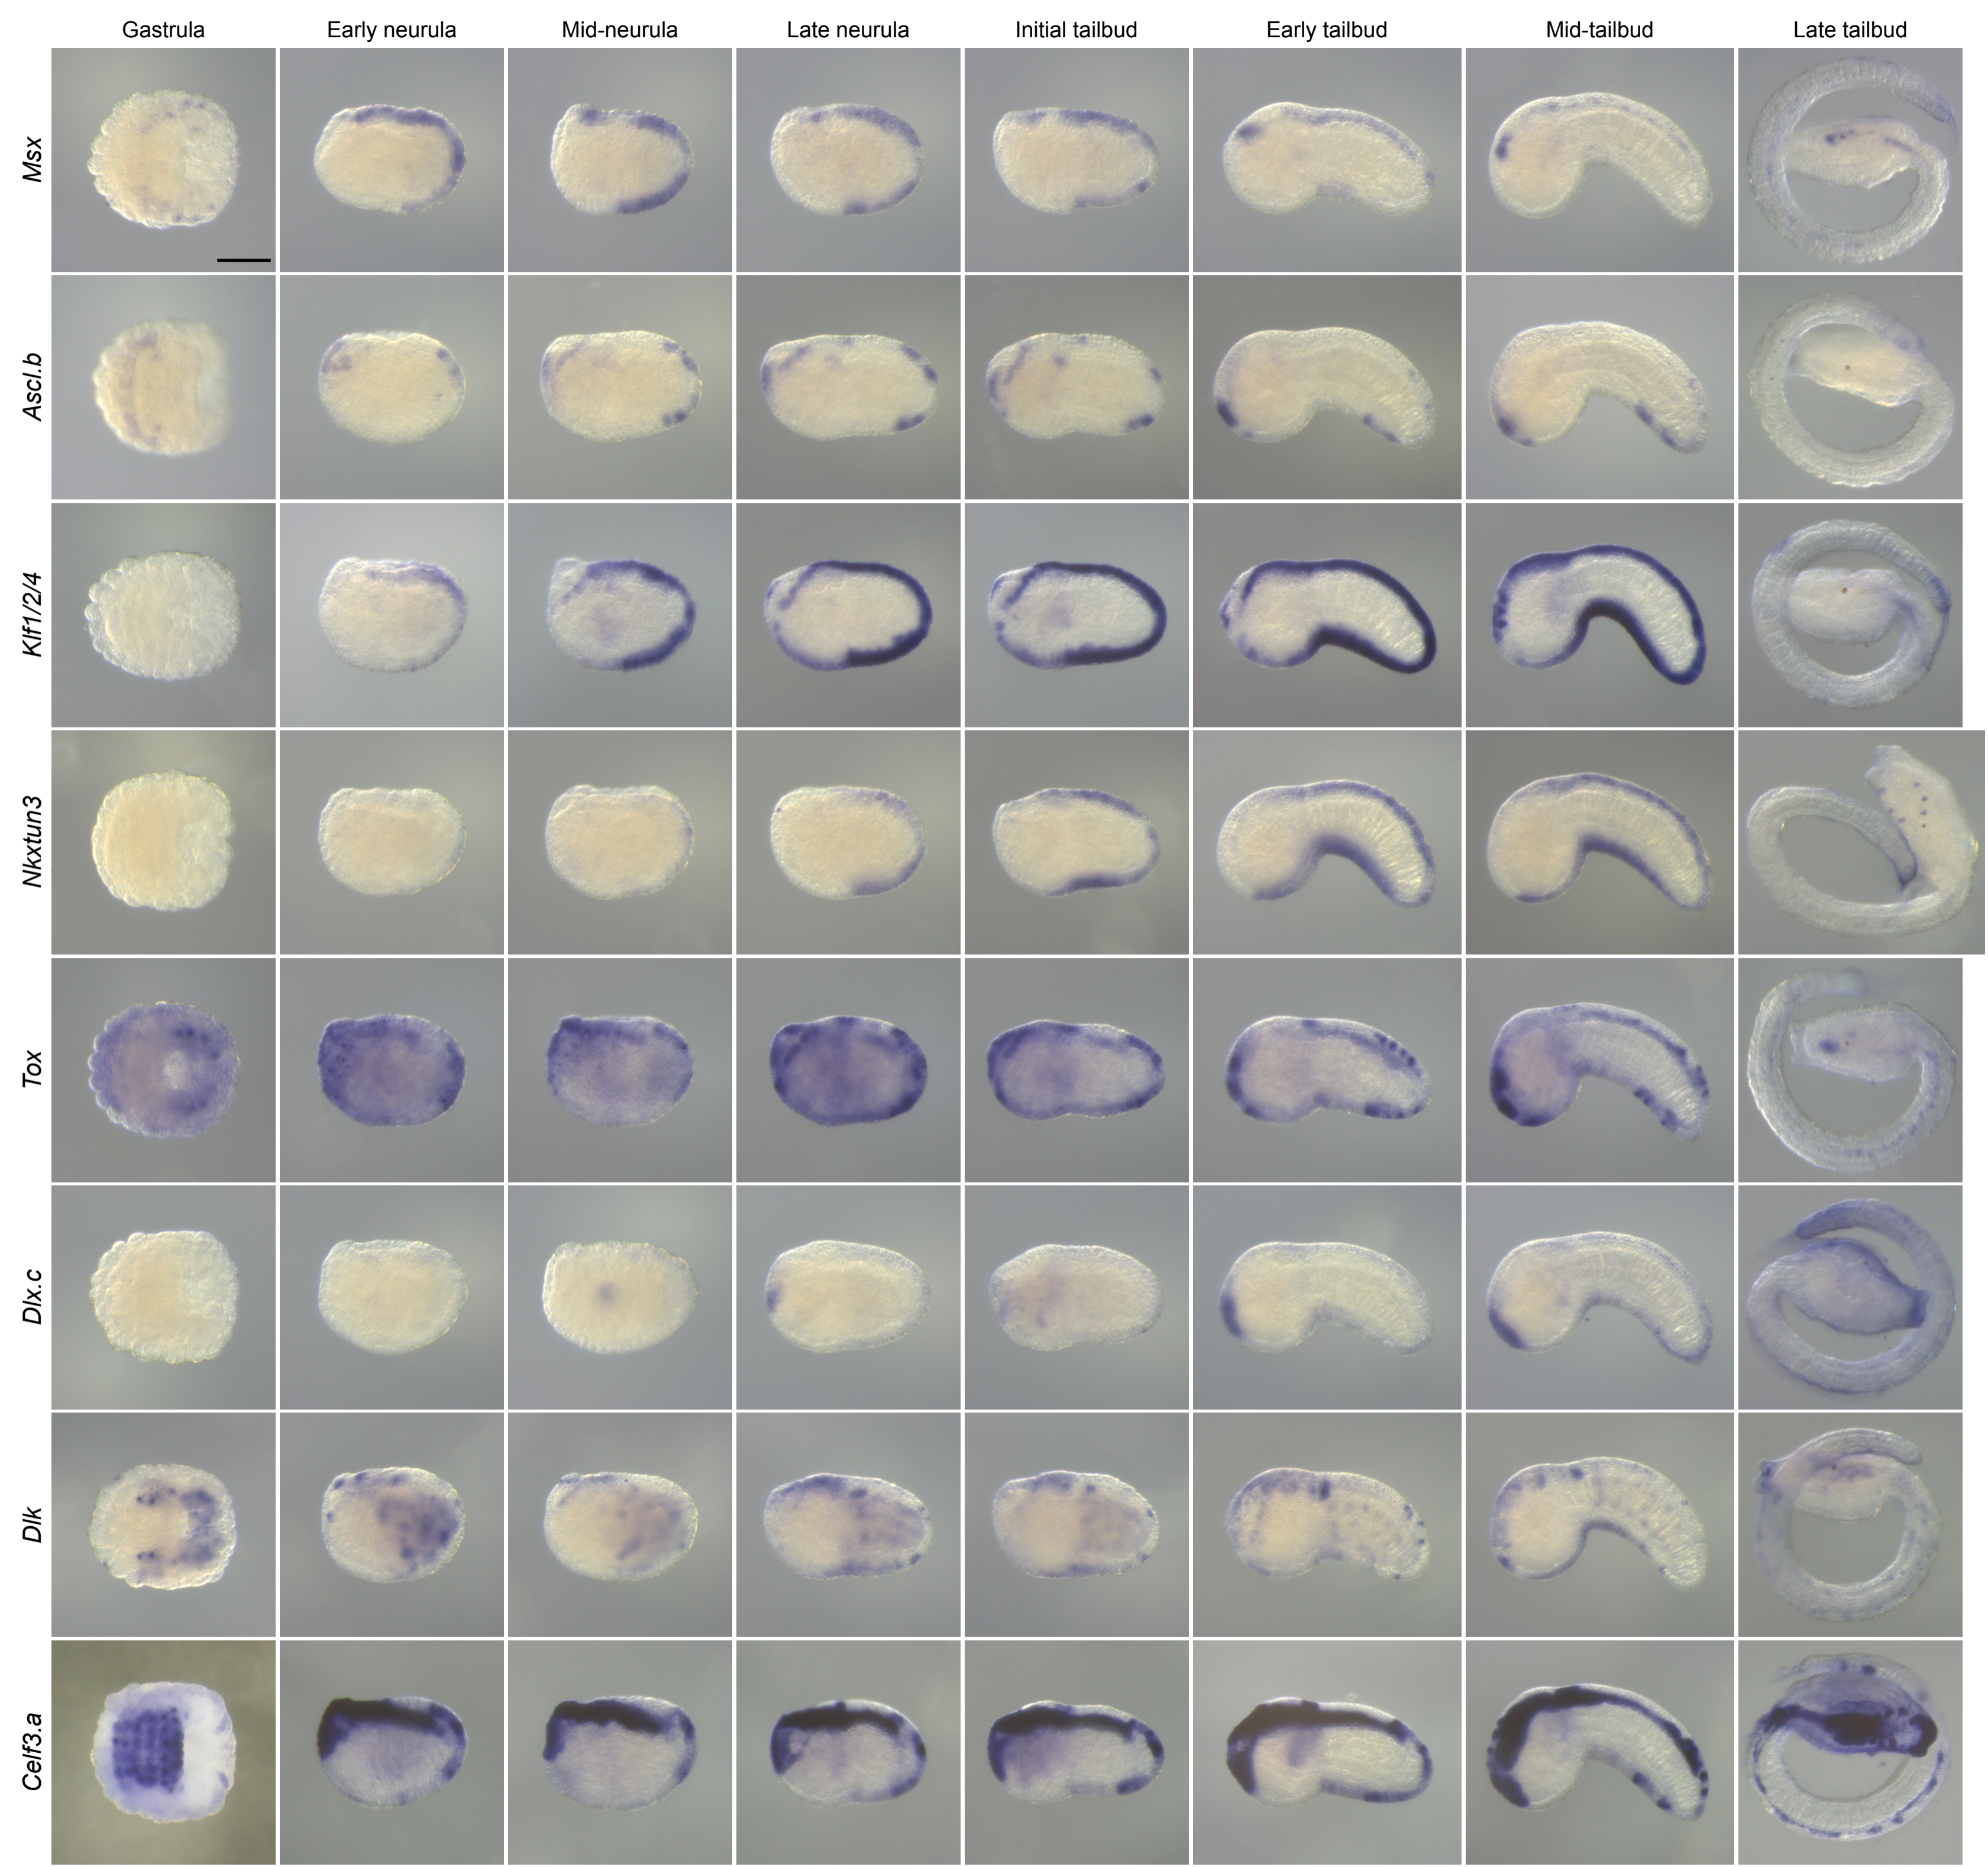

Supplement: supp [file elife-59157-supp-v1.zip › elife_poa_e59157_Figure_8_figure_supplement_2.pdf]

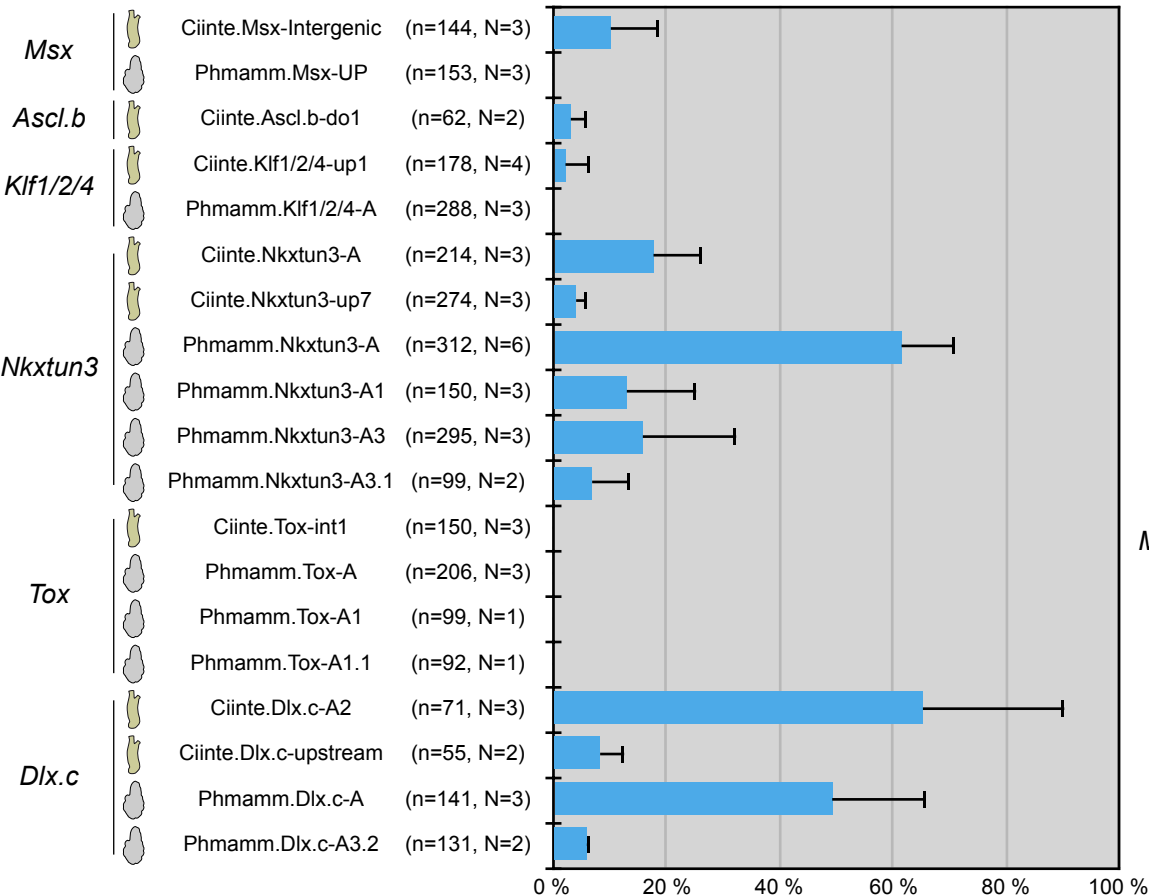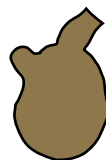

*Molgula appendiculata*

Supplement: supp [file elife-59157-supp-v1.zip › elife_poa_e59157_Figure_9_figure_supplement_1.pdf]

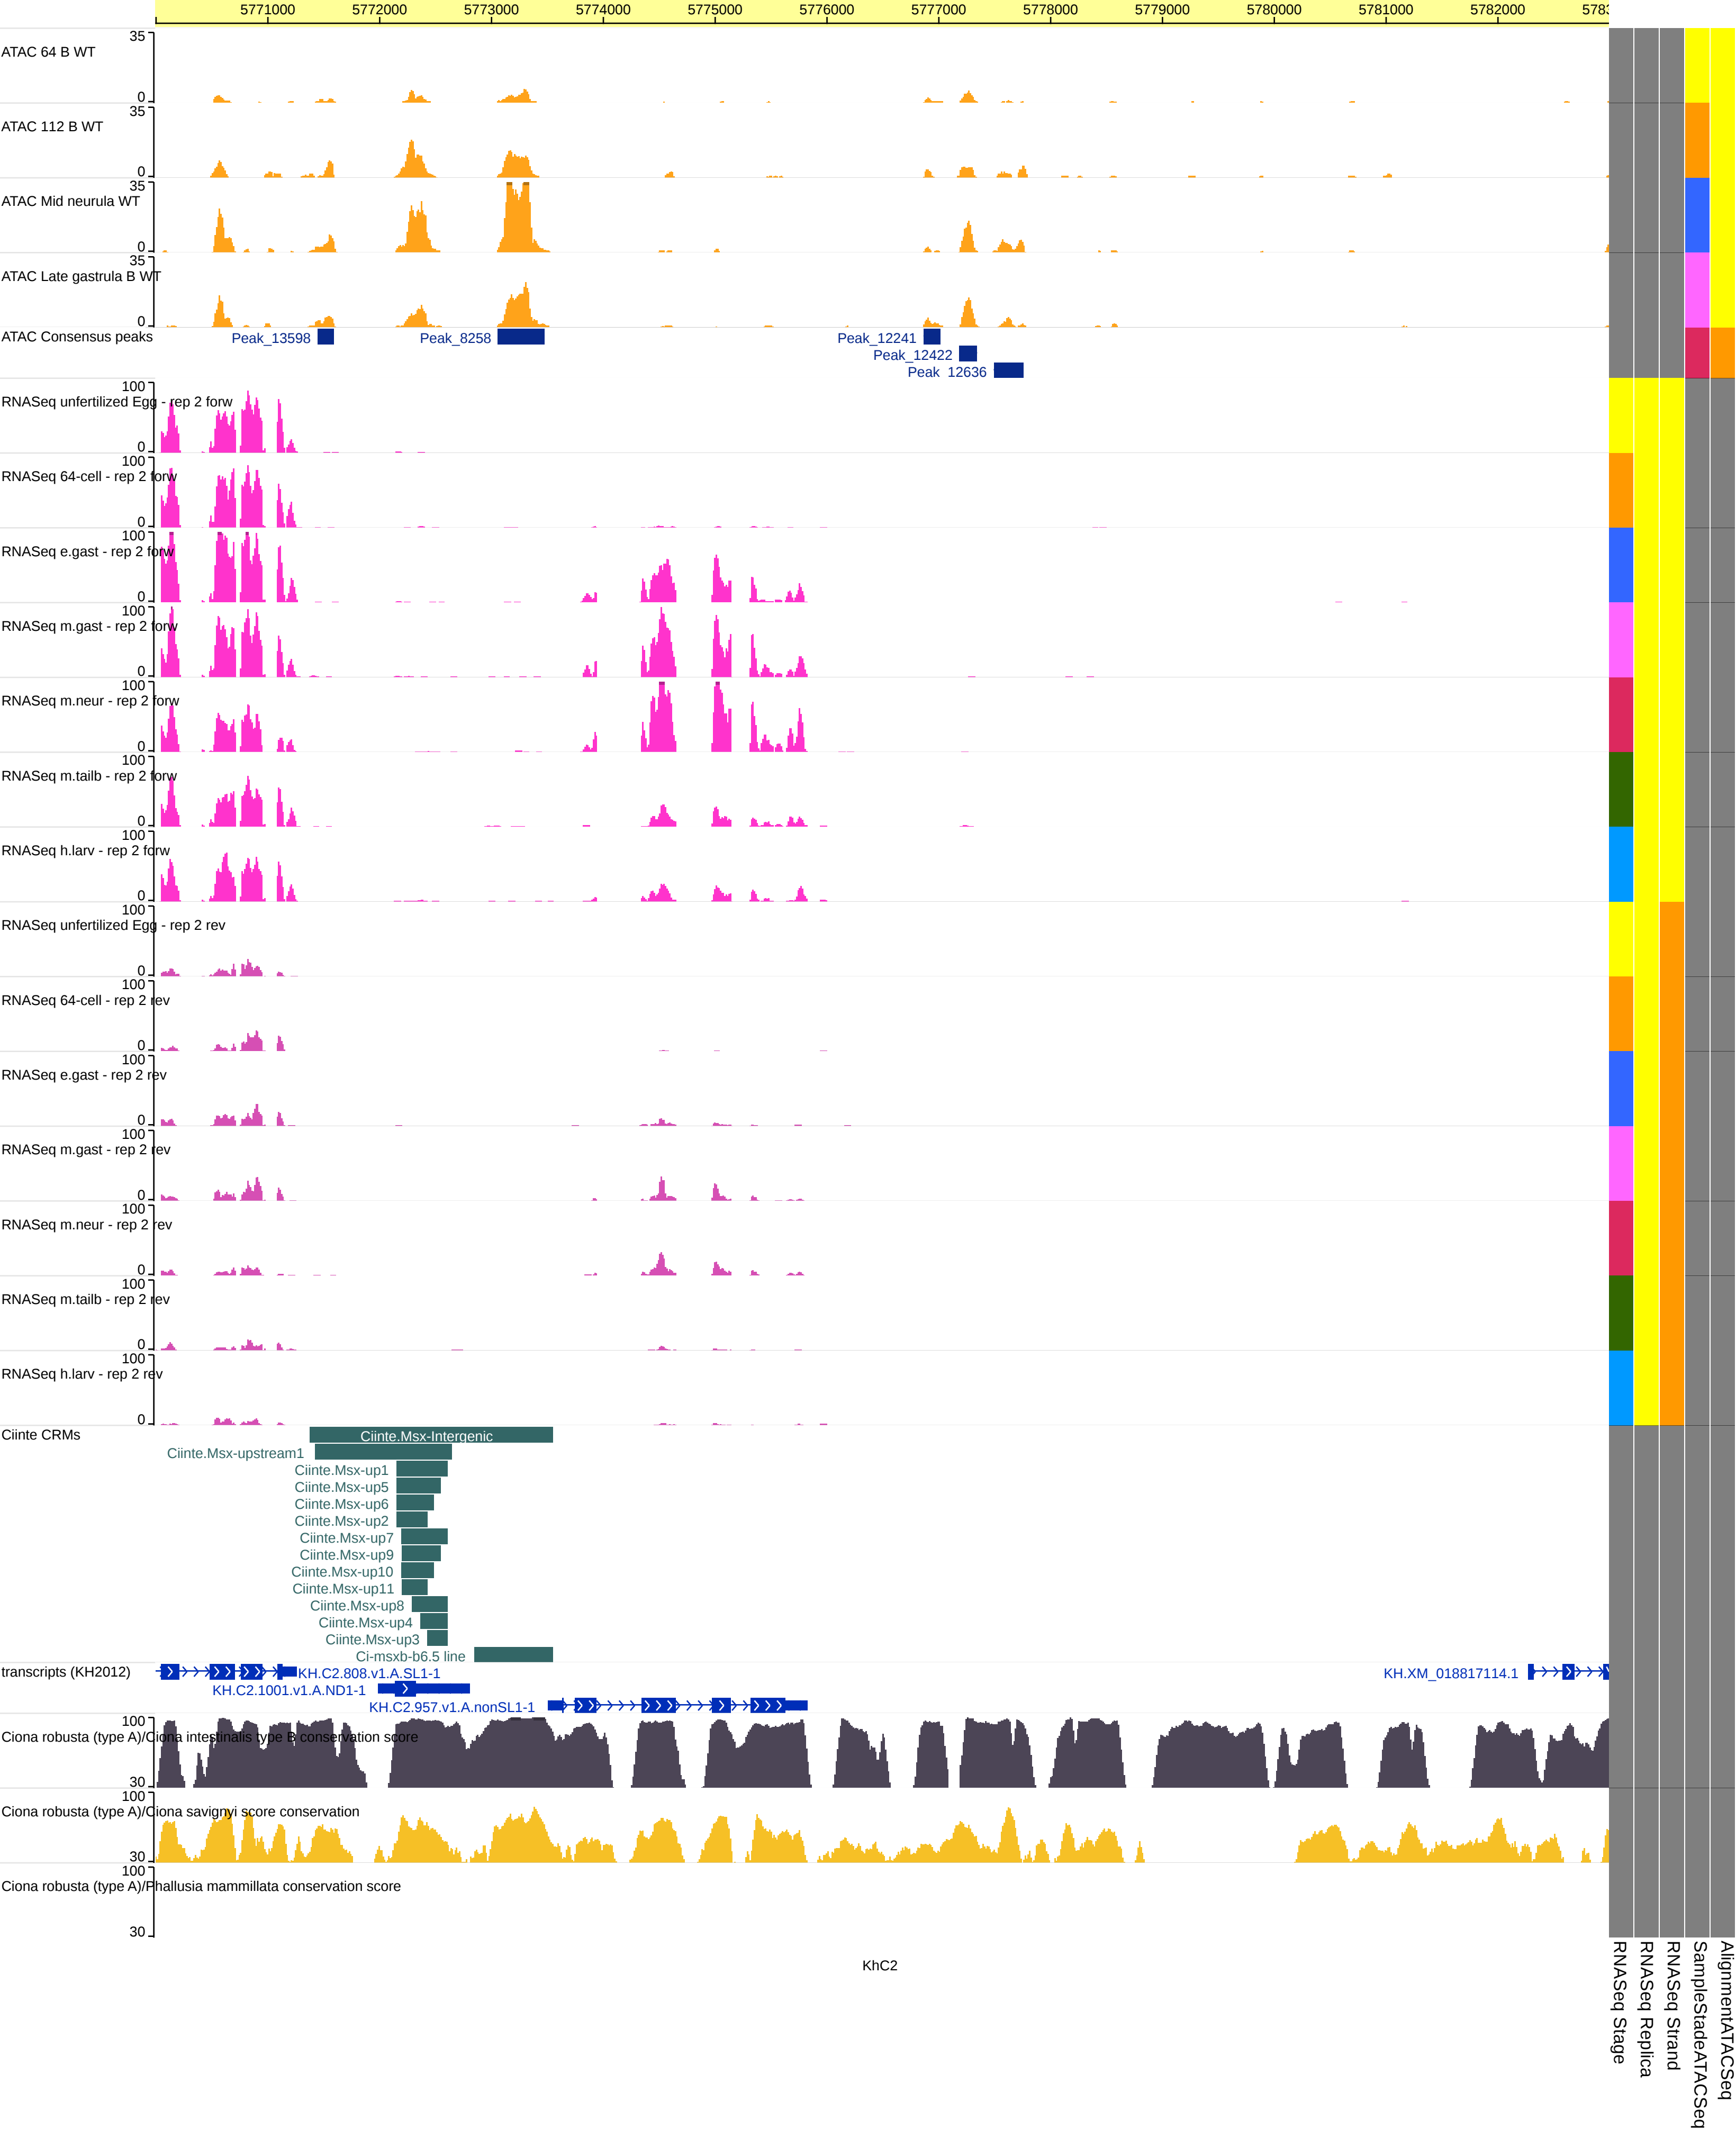

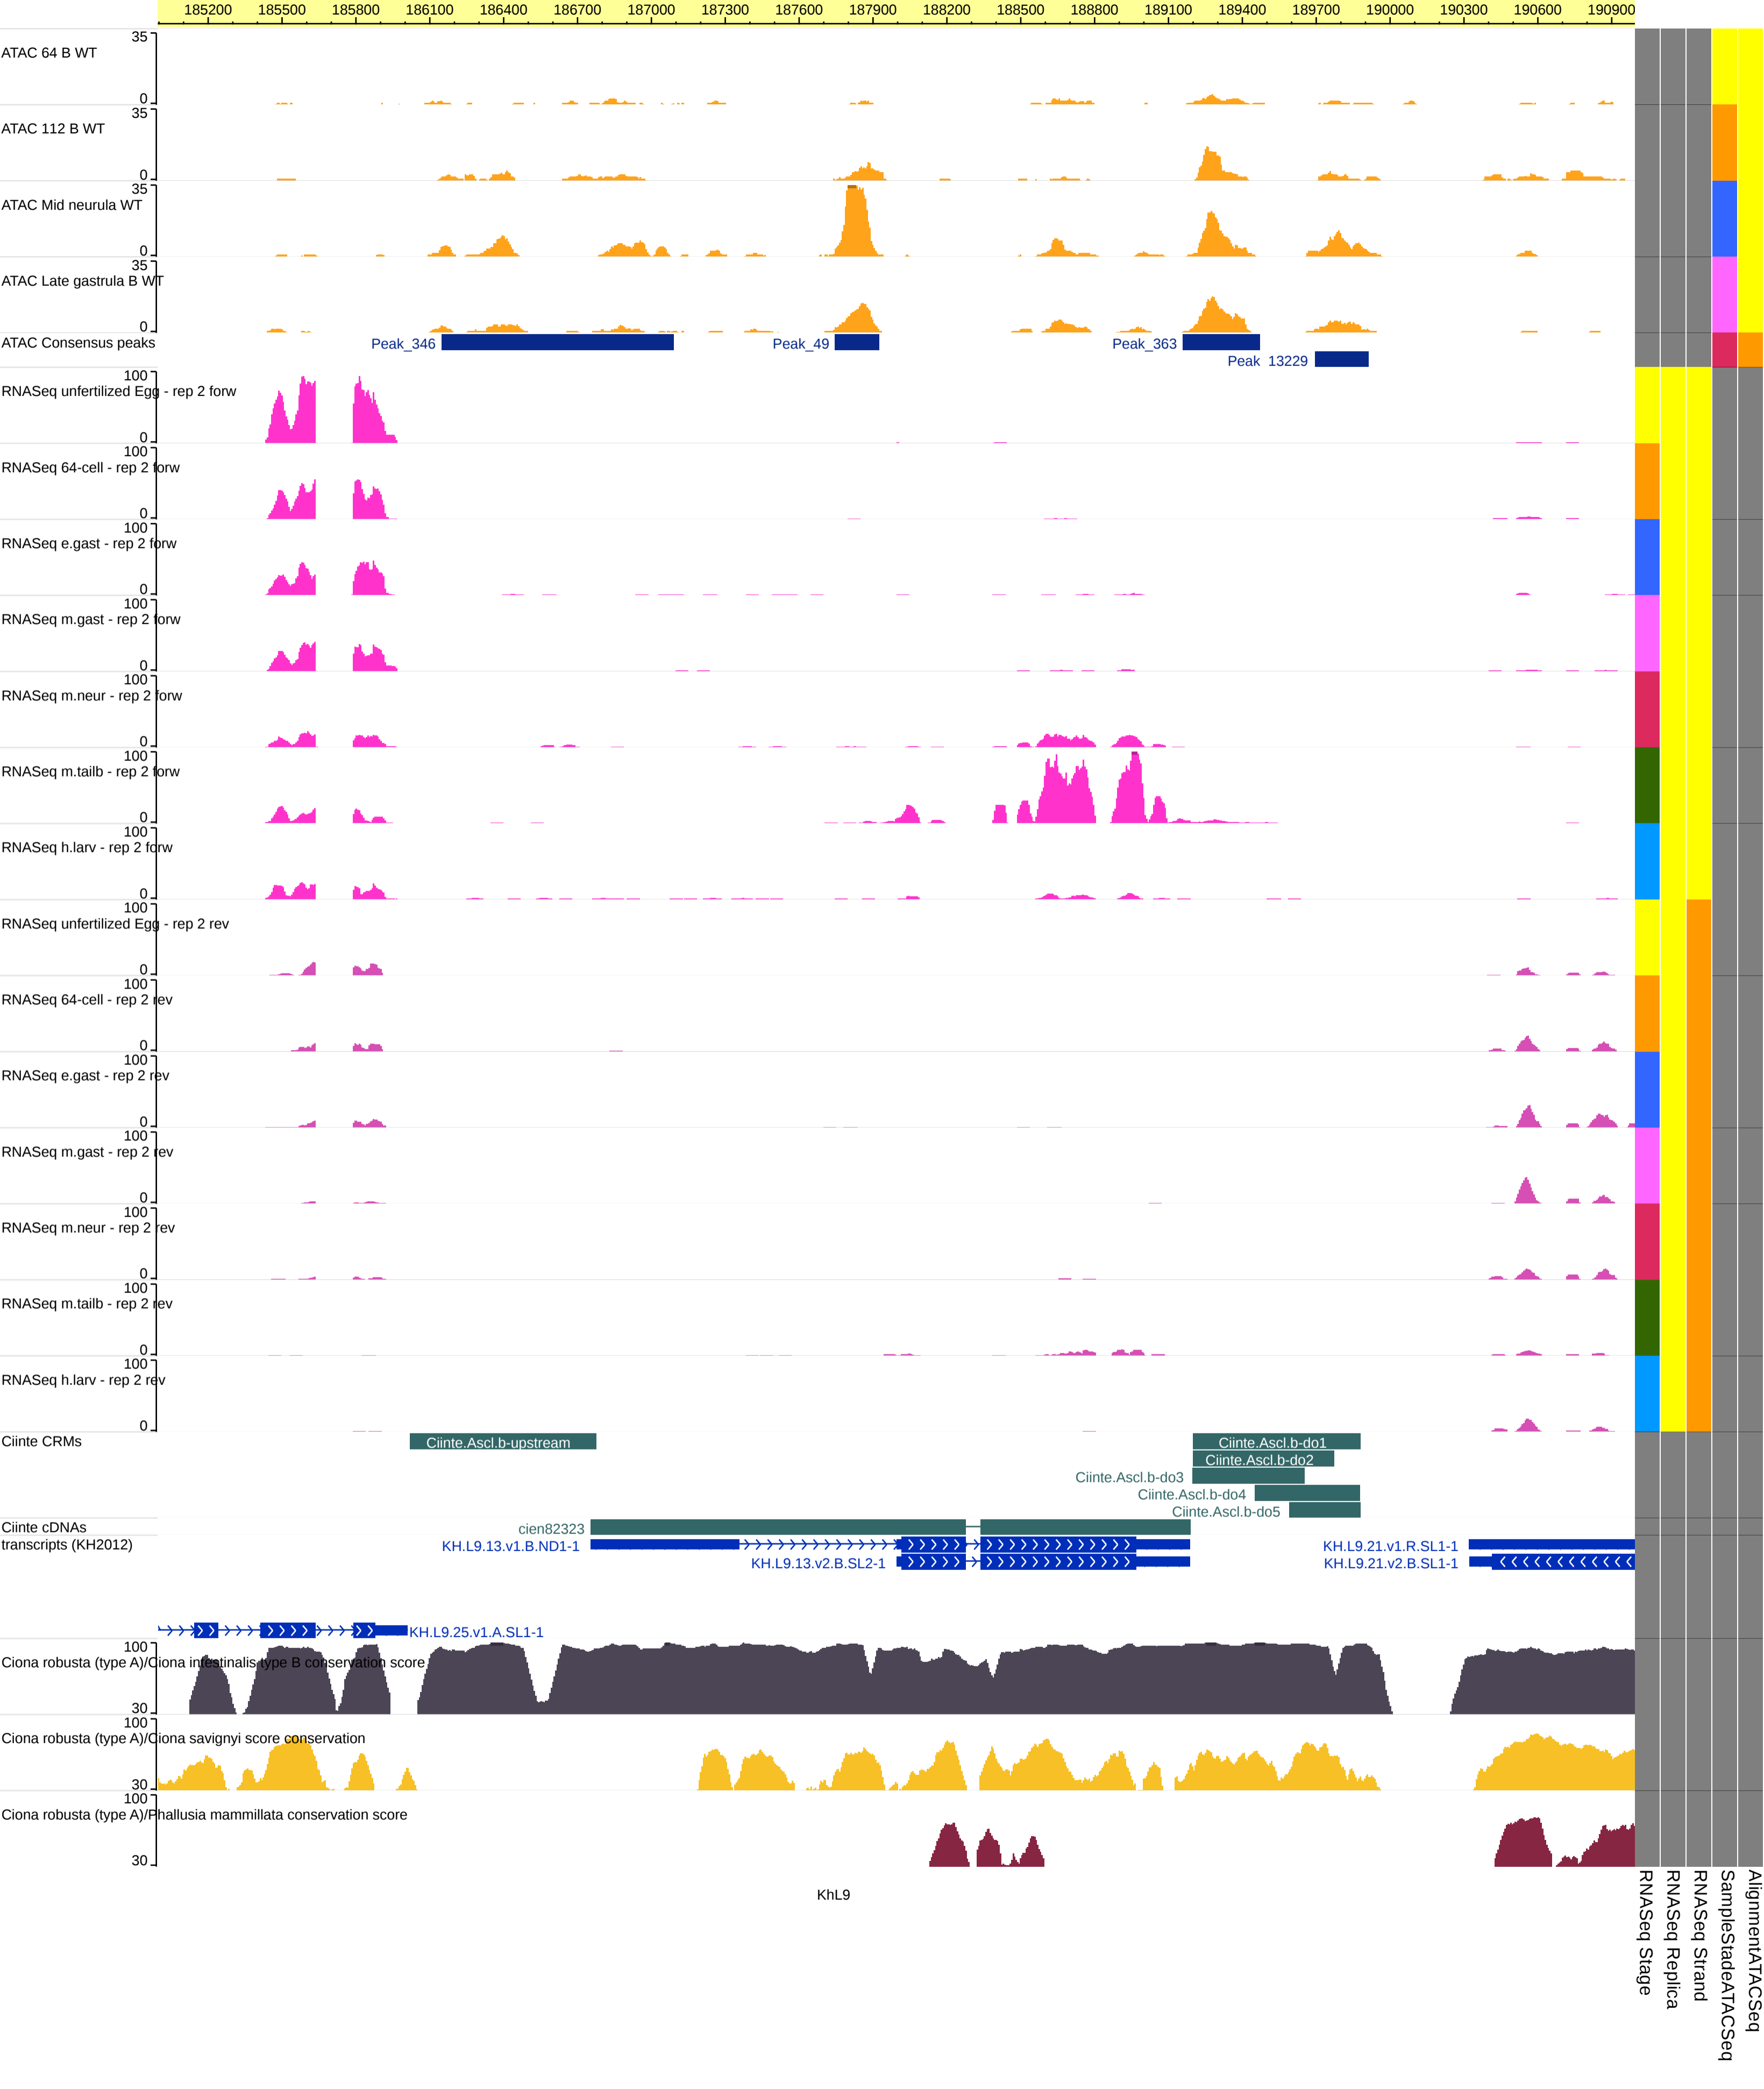

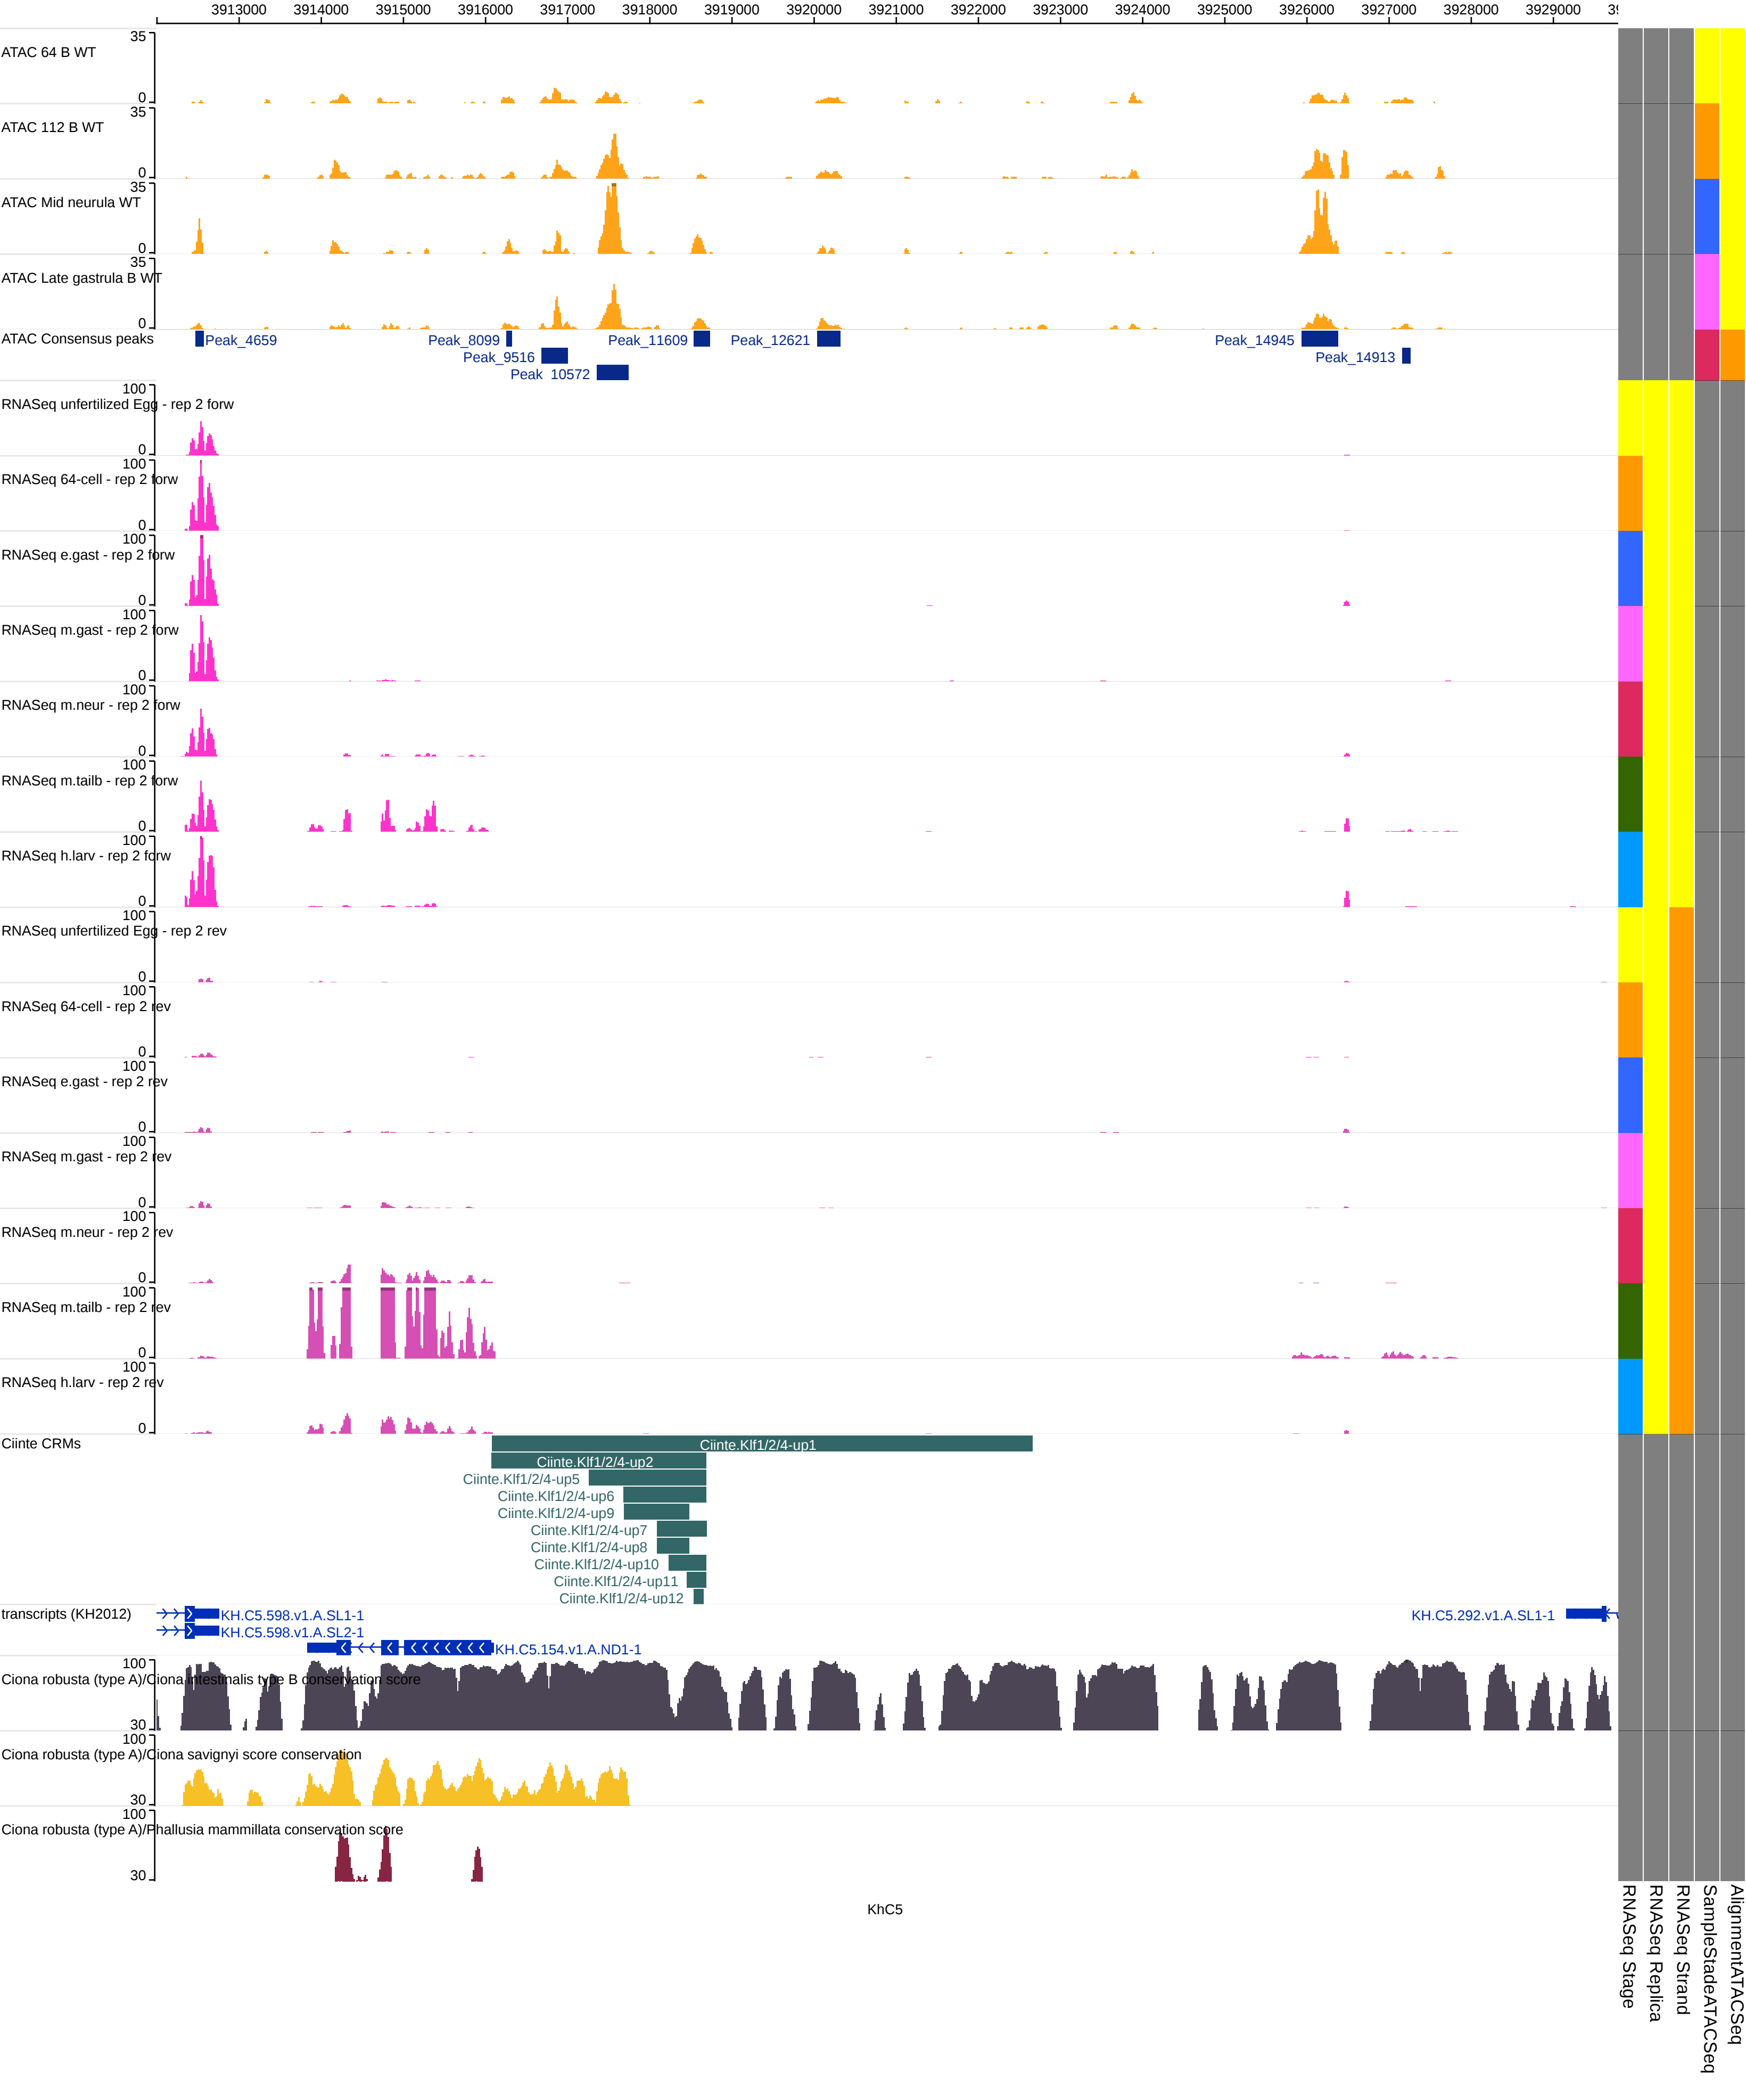

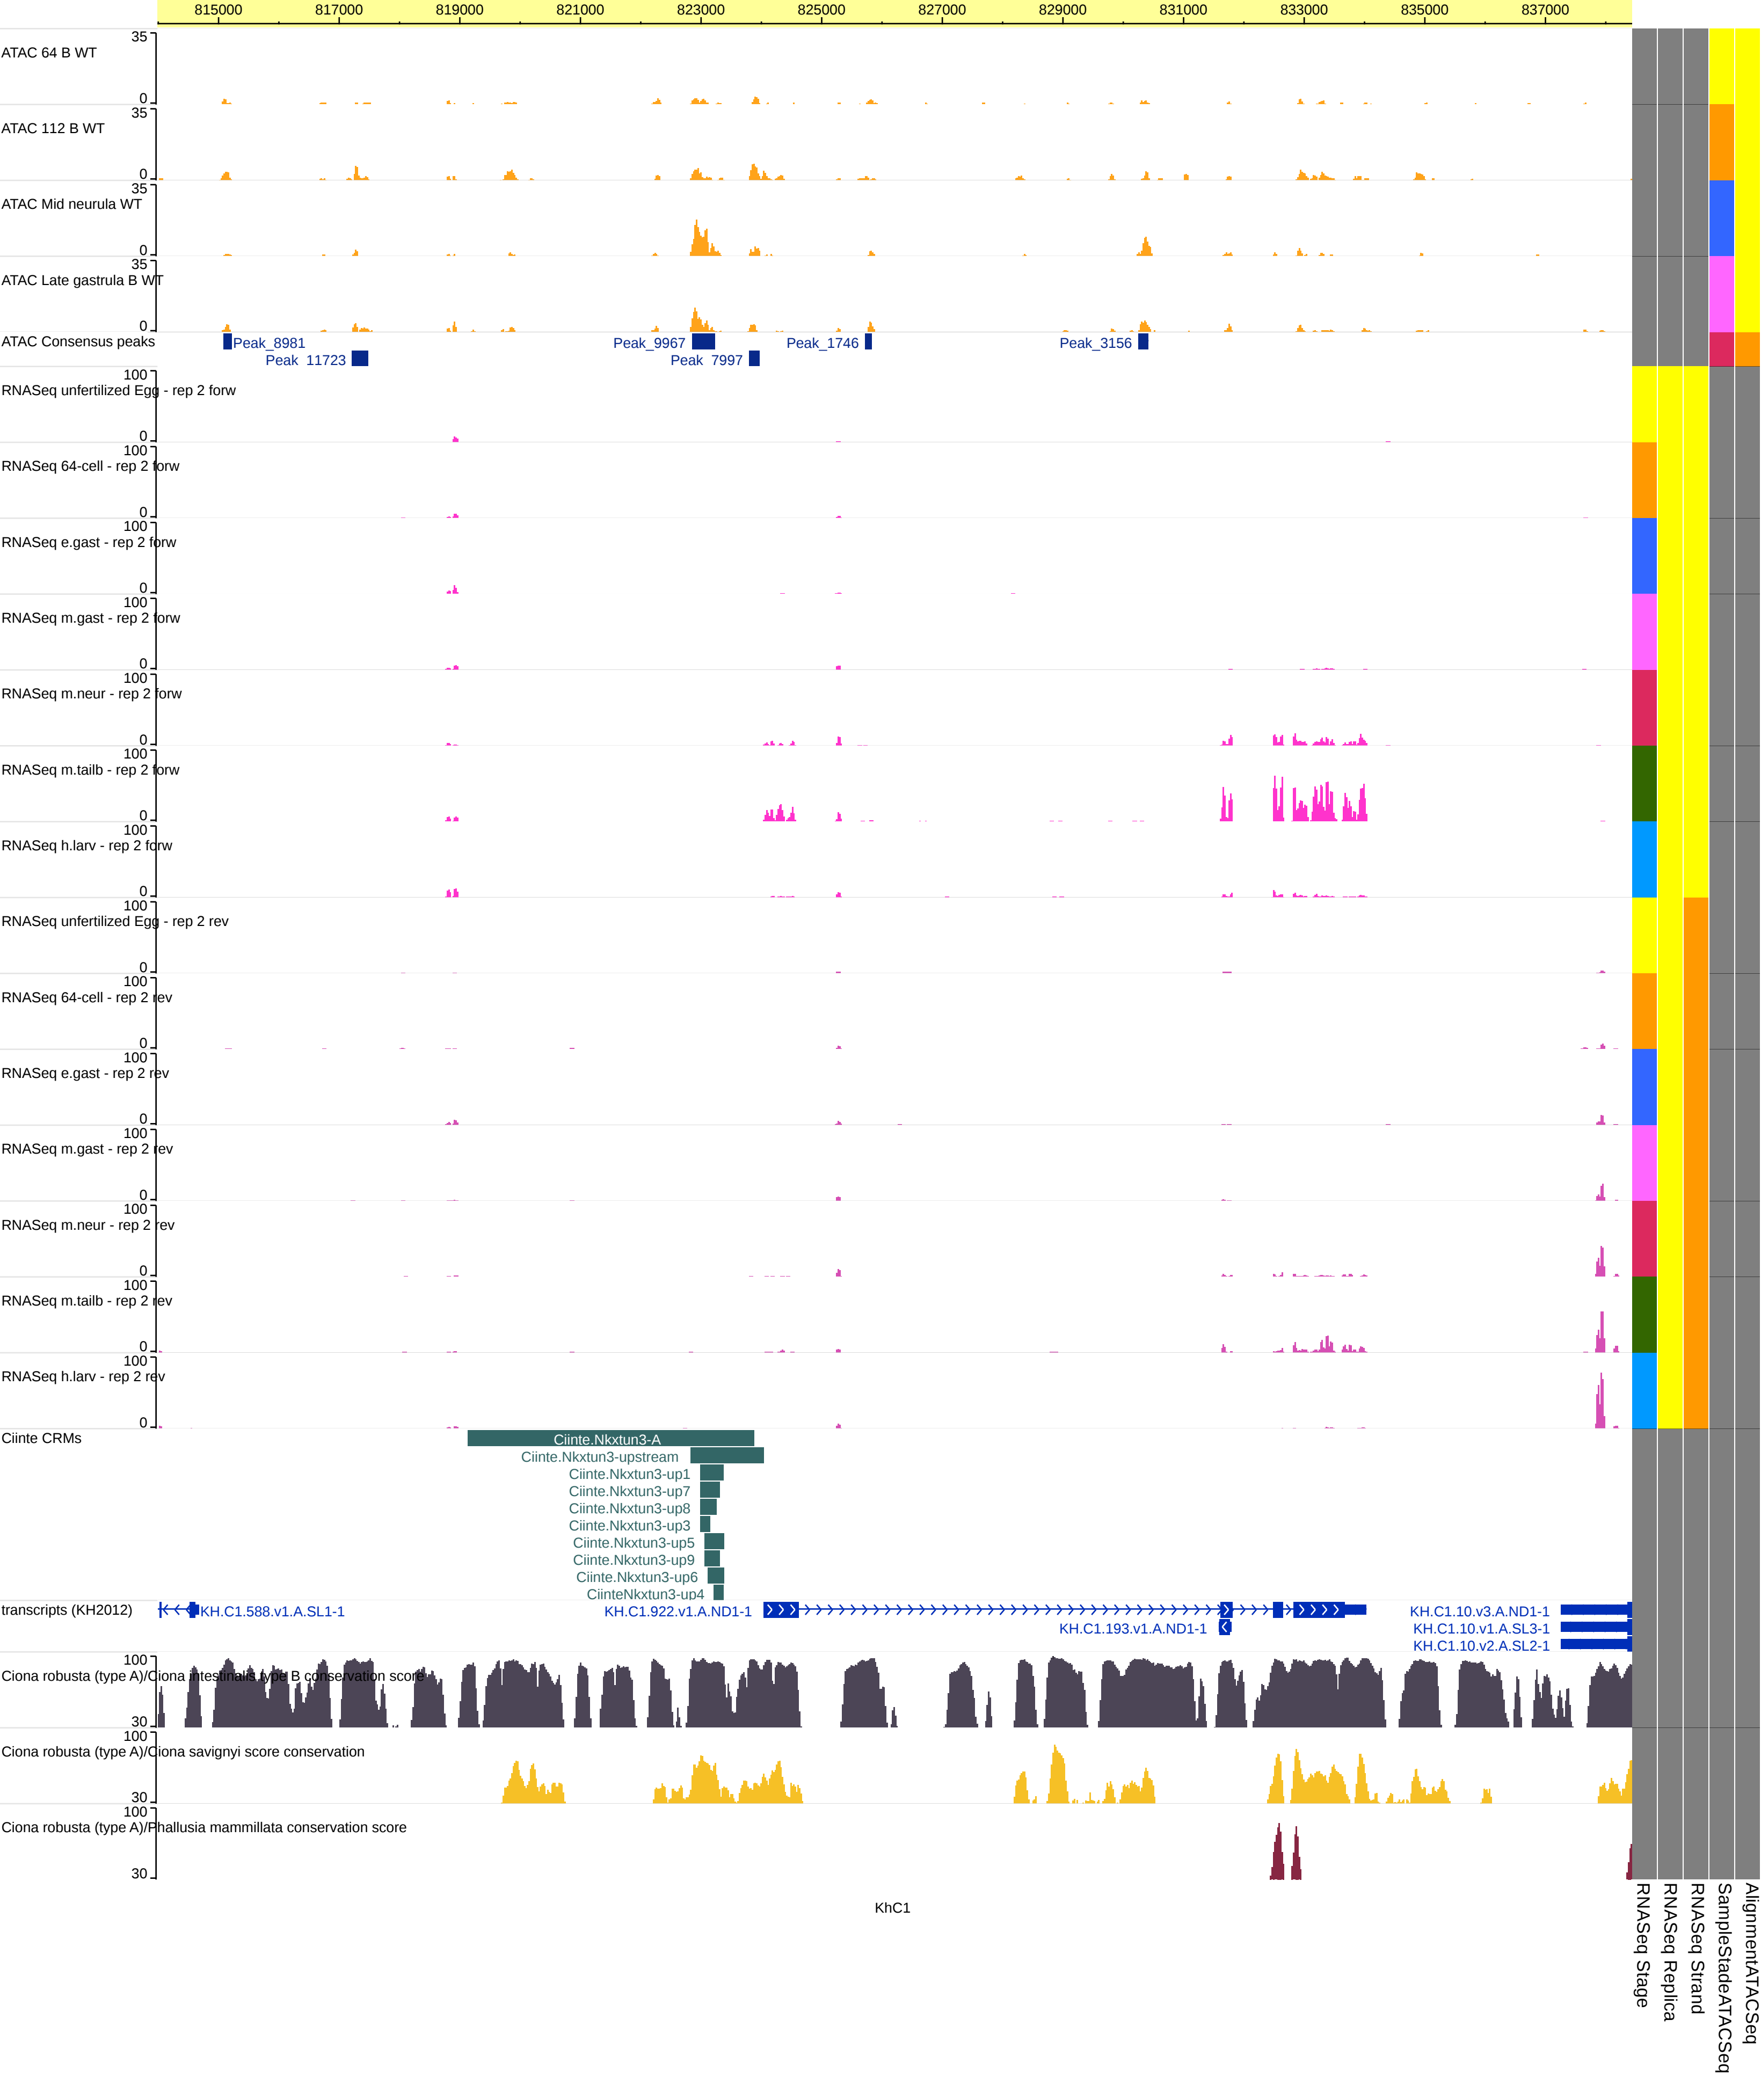

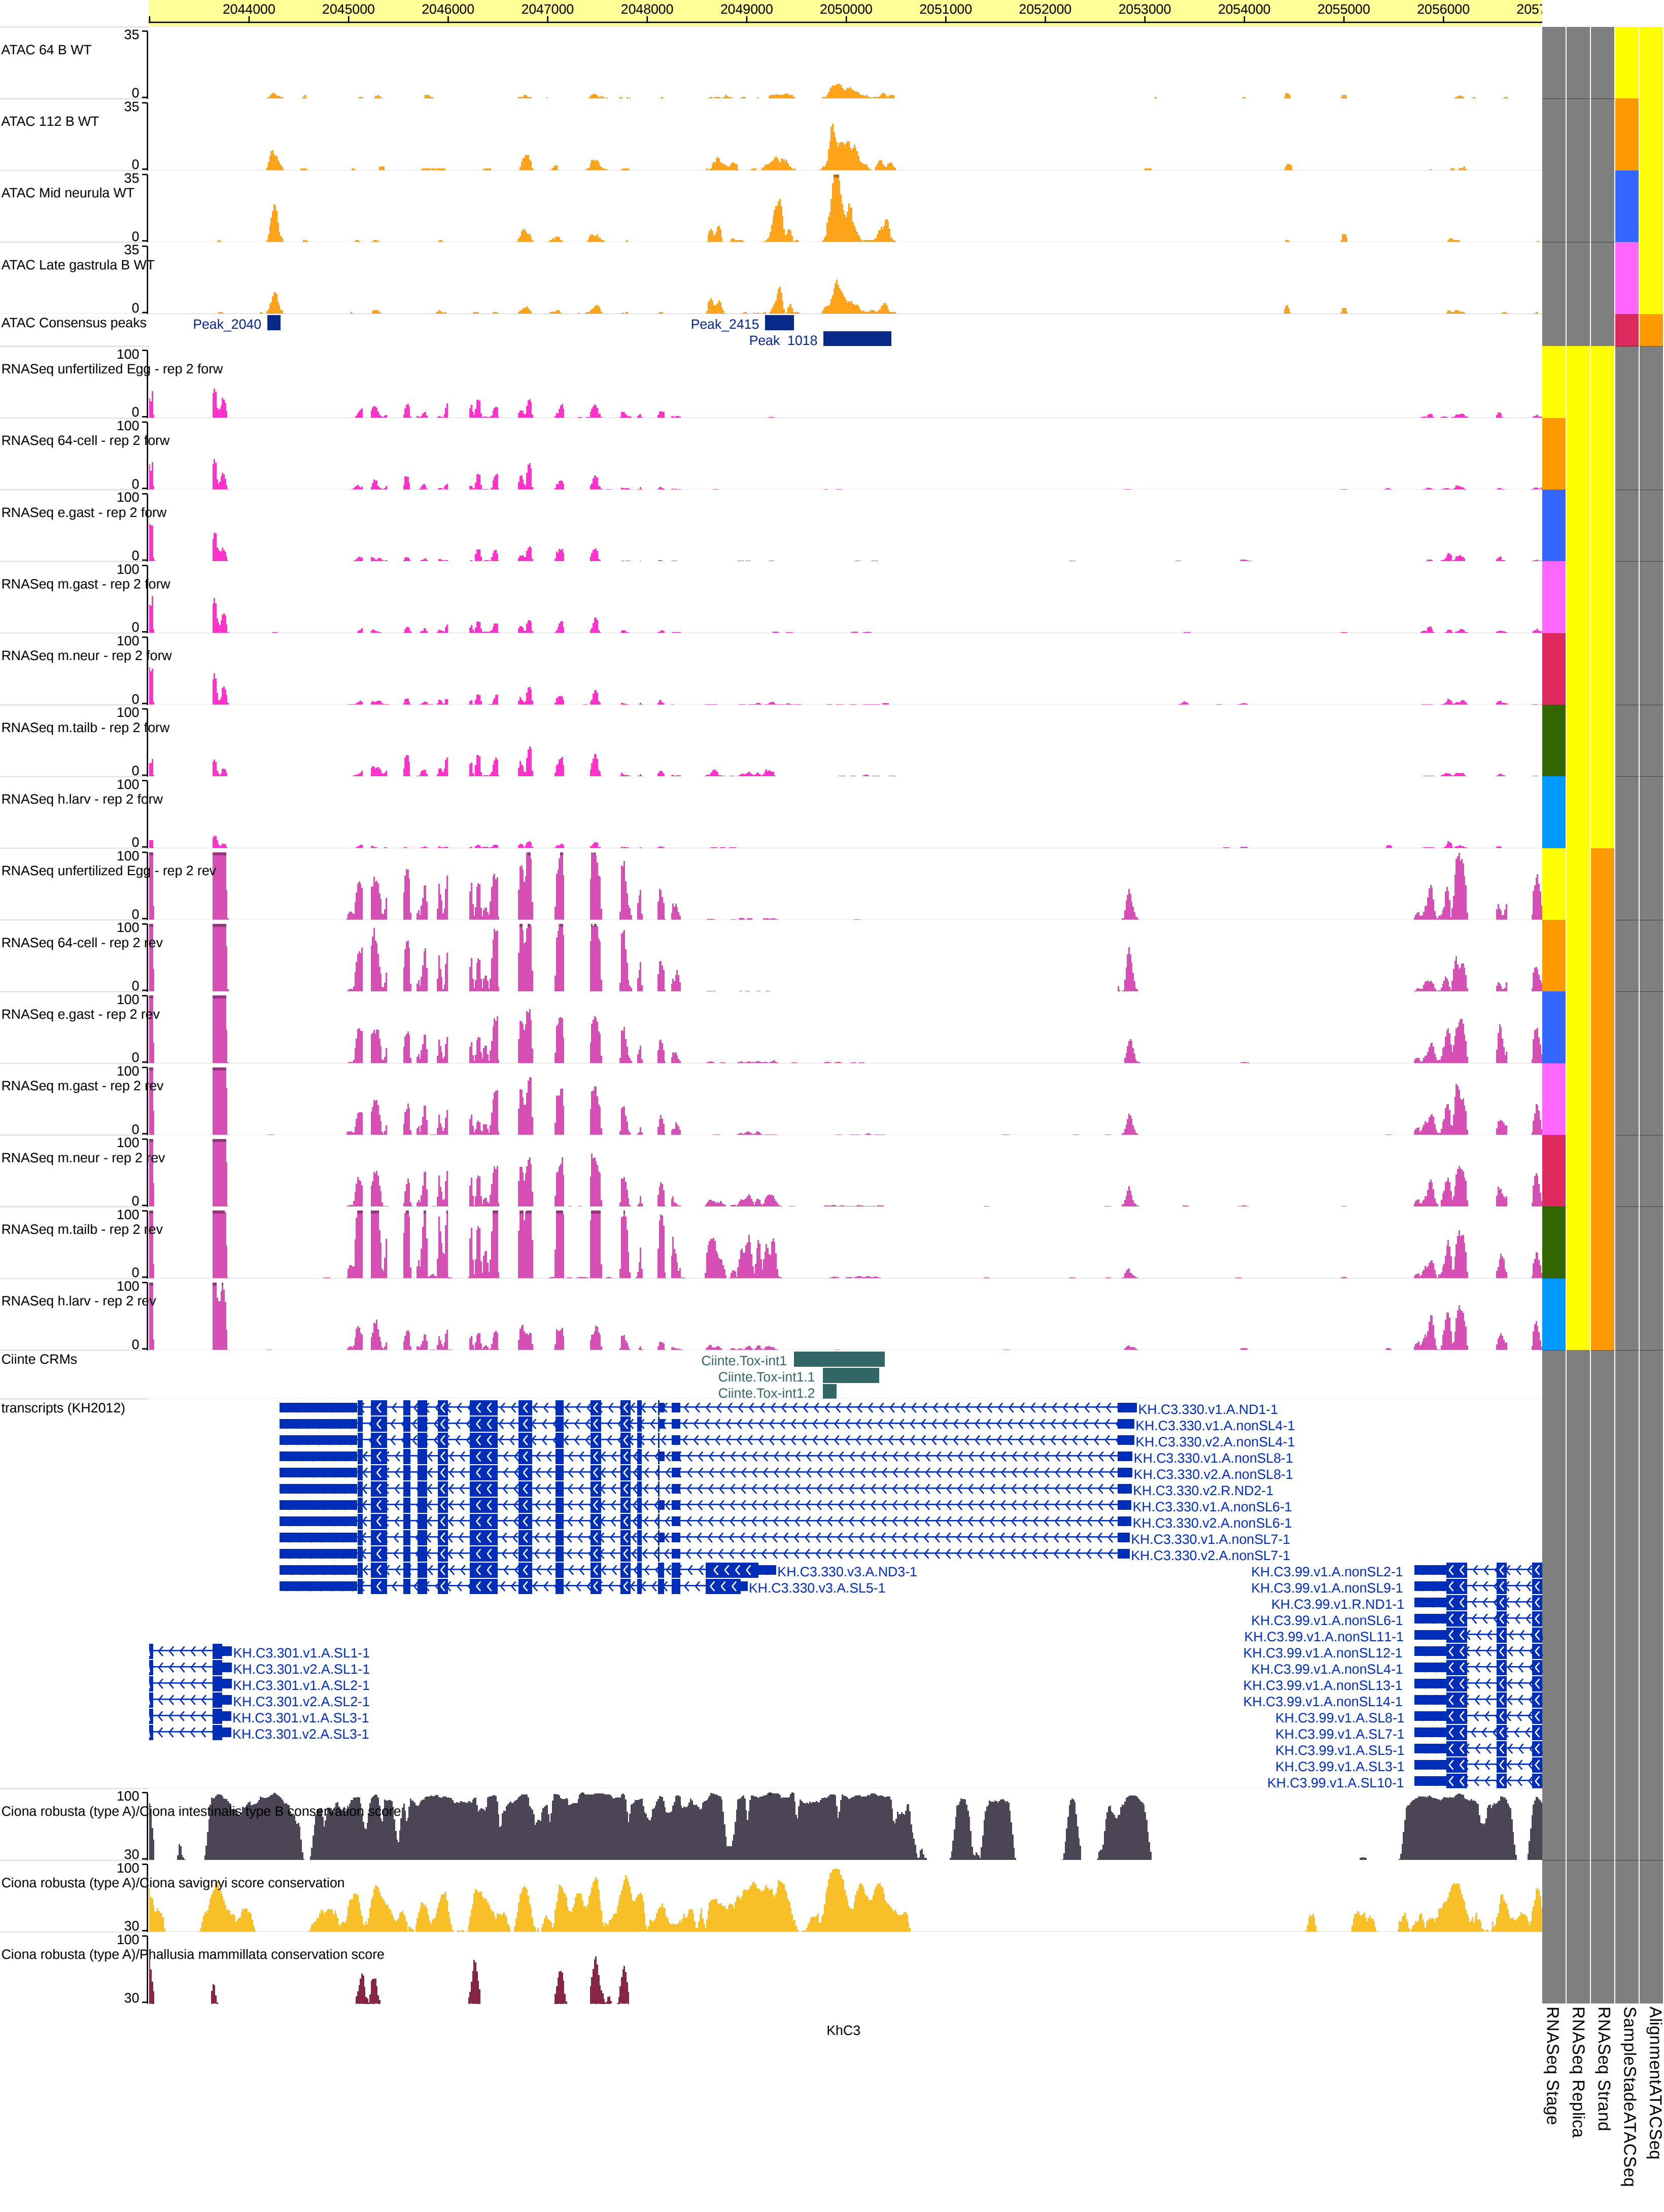

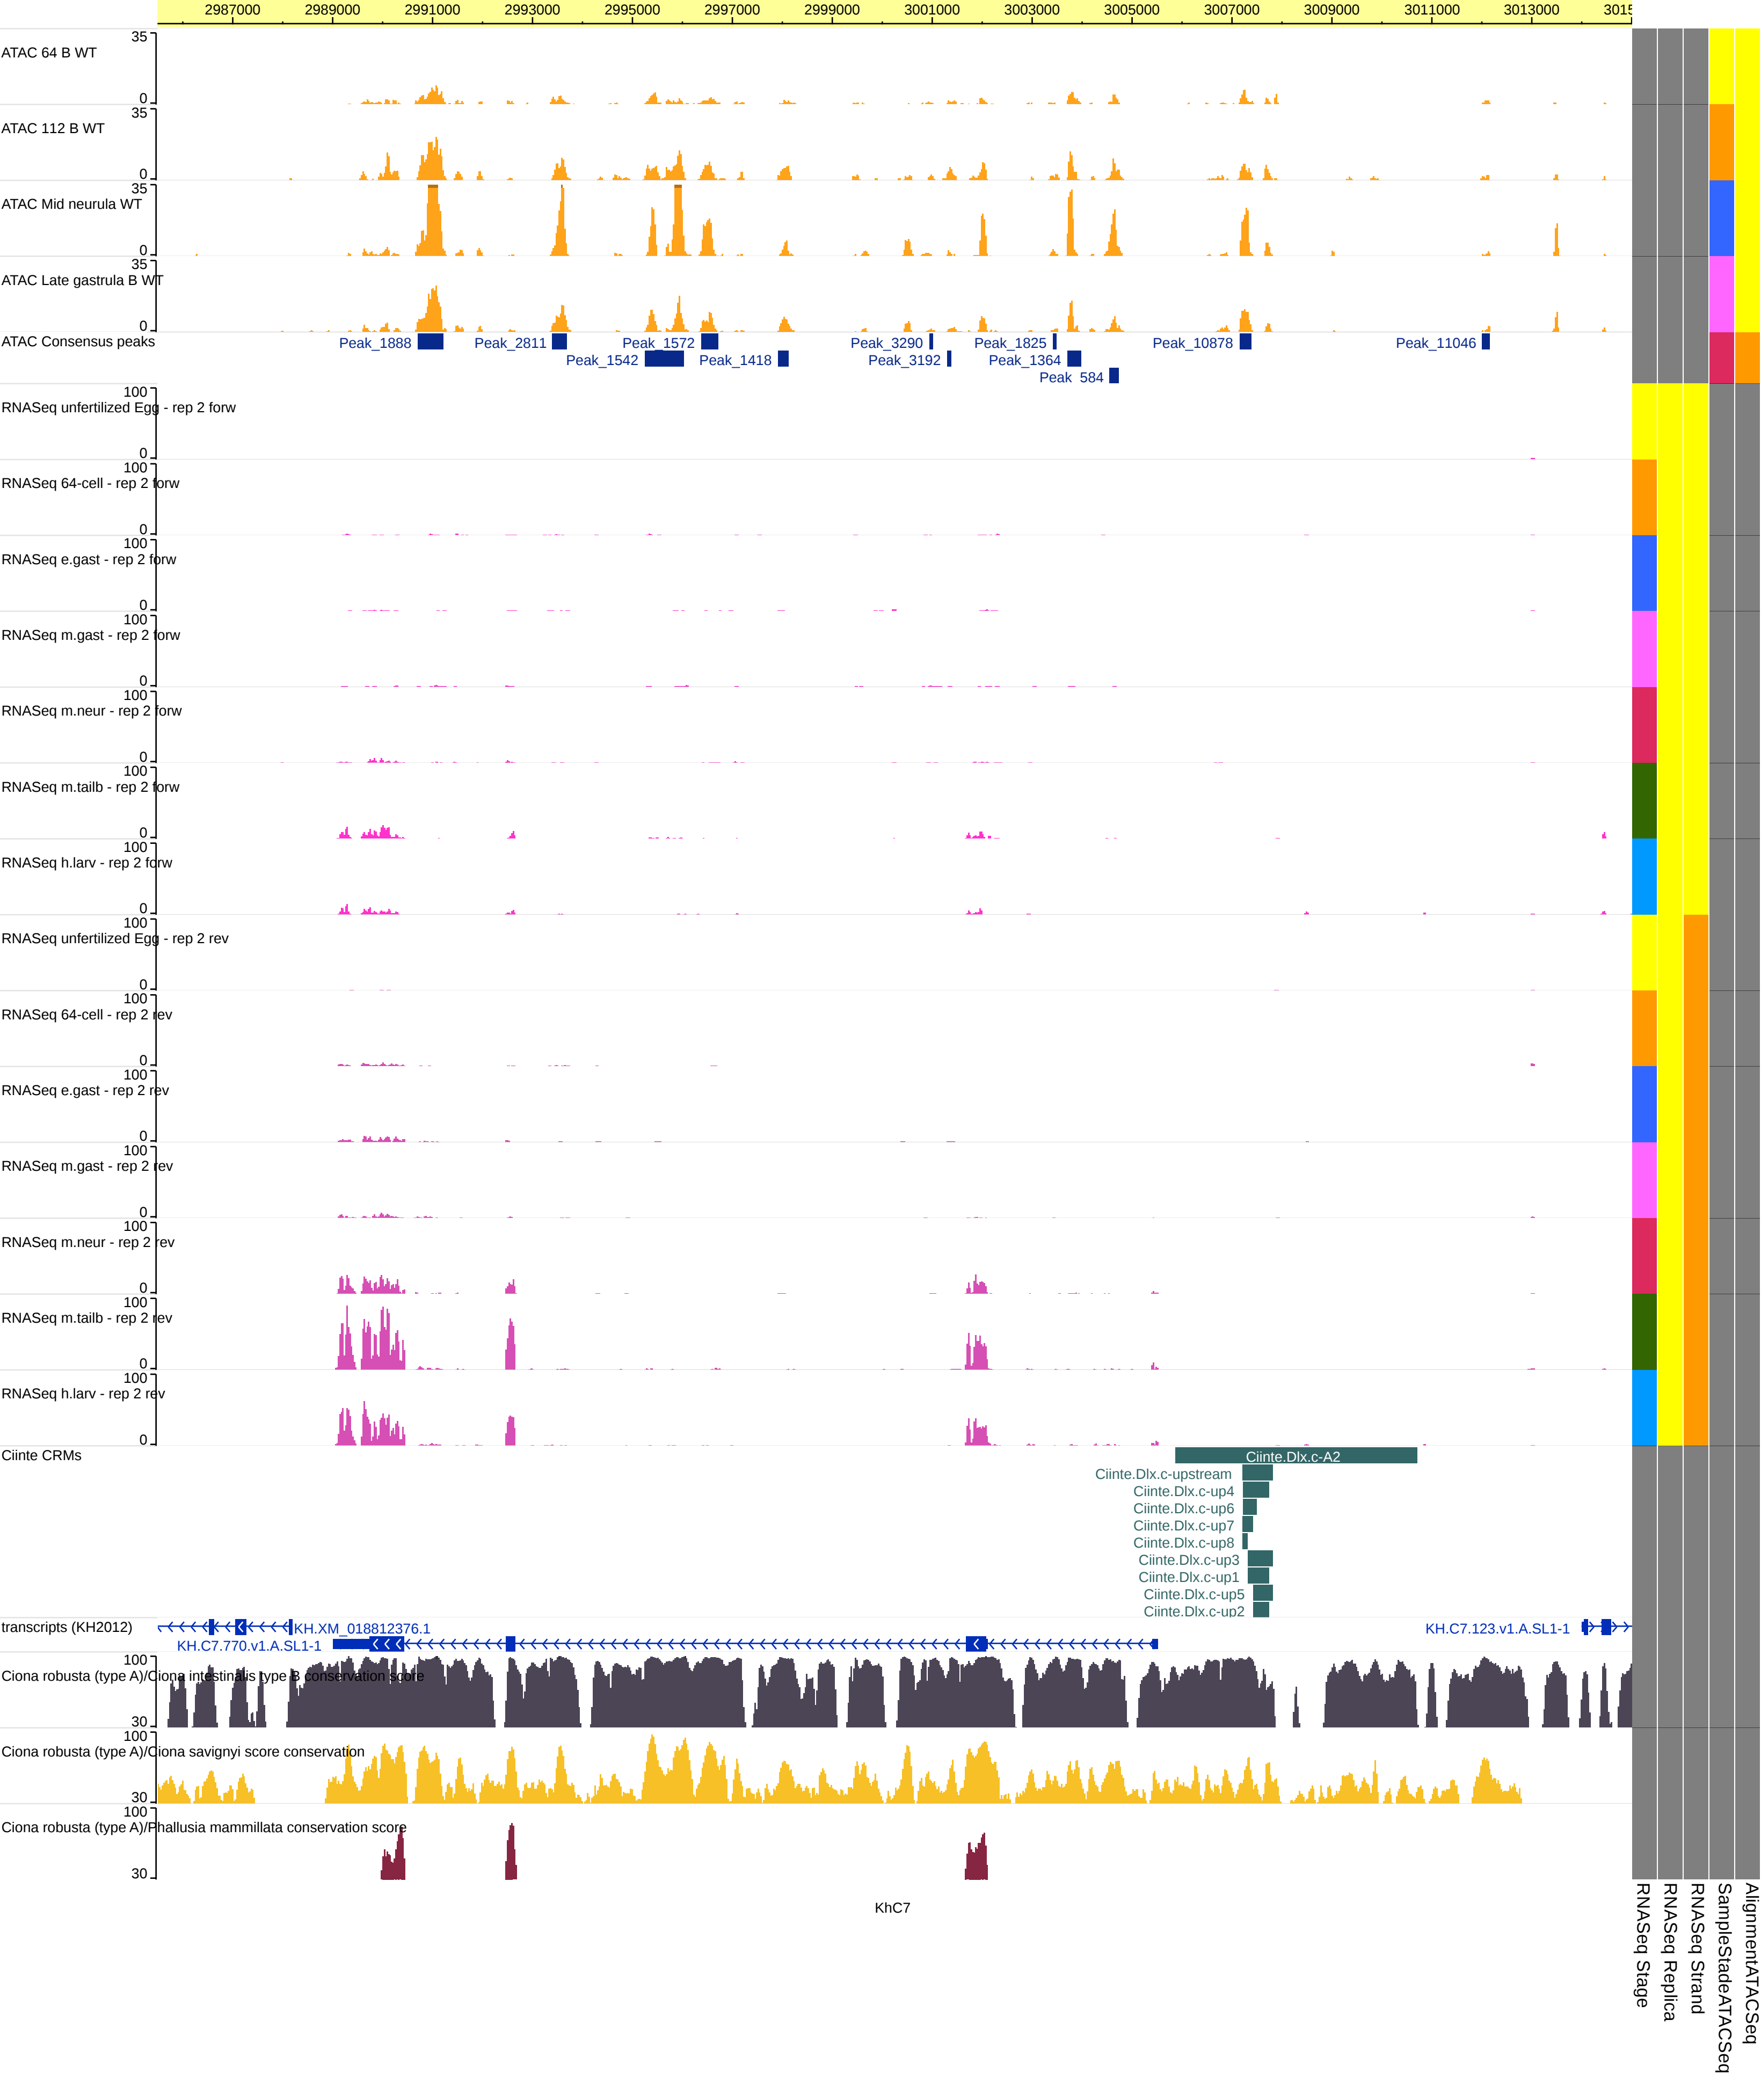

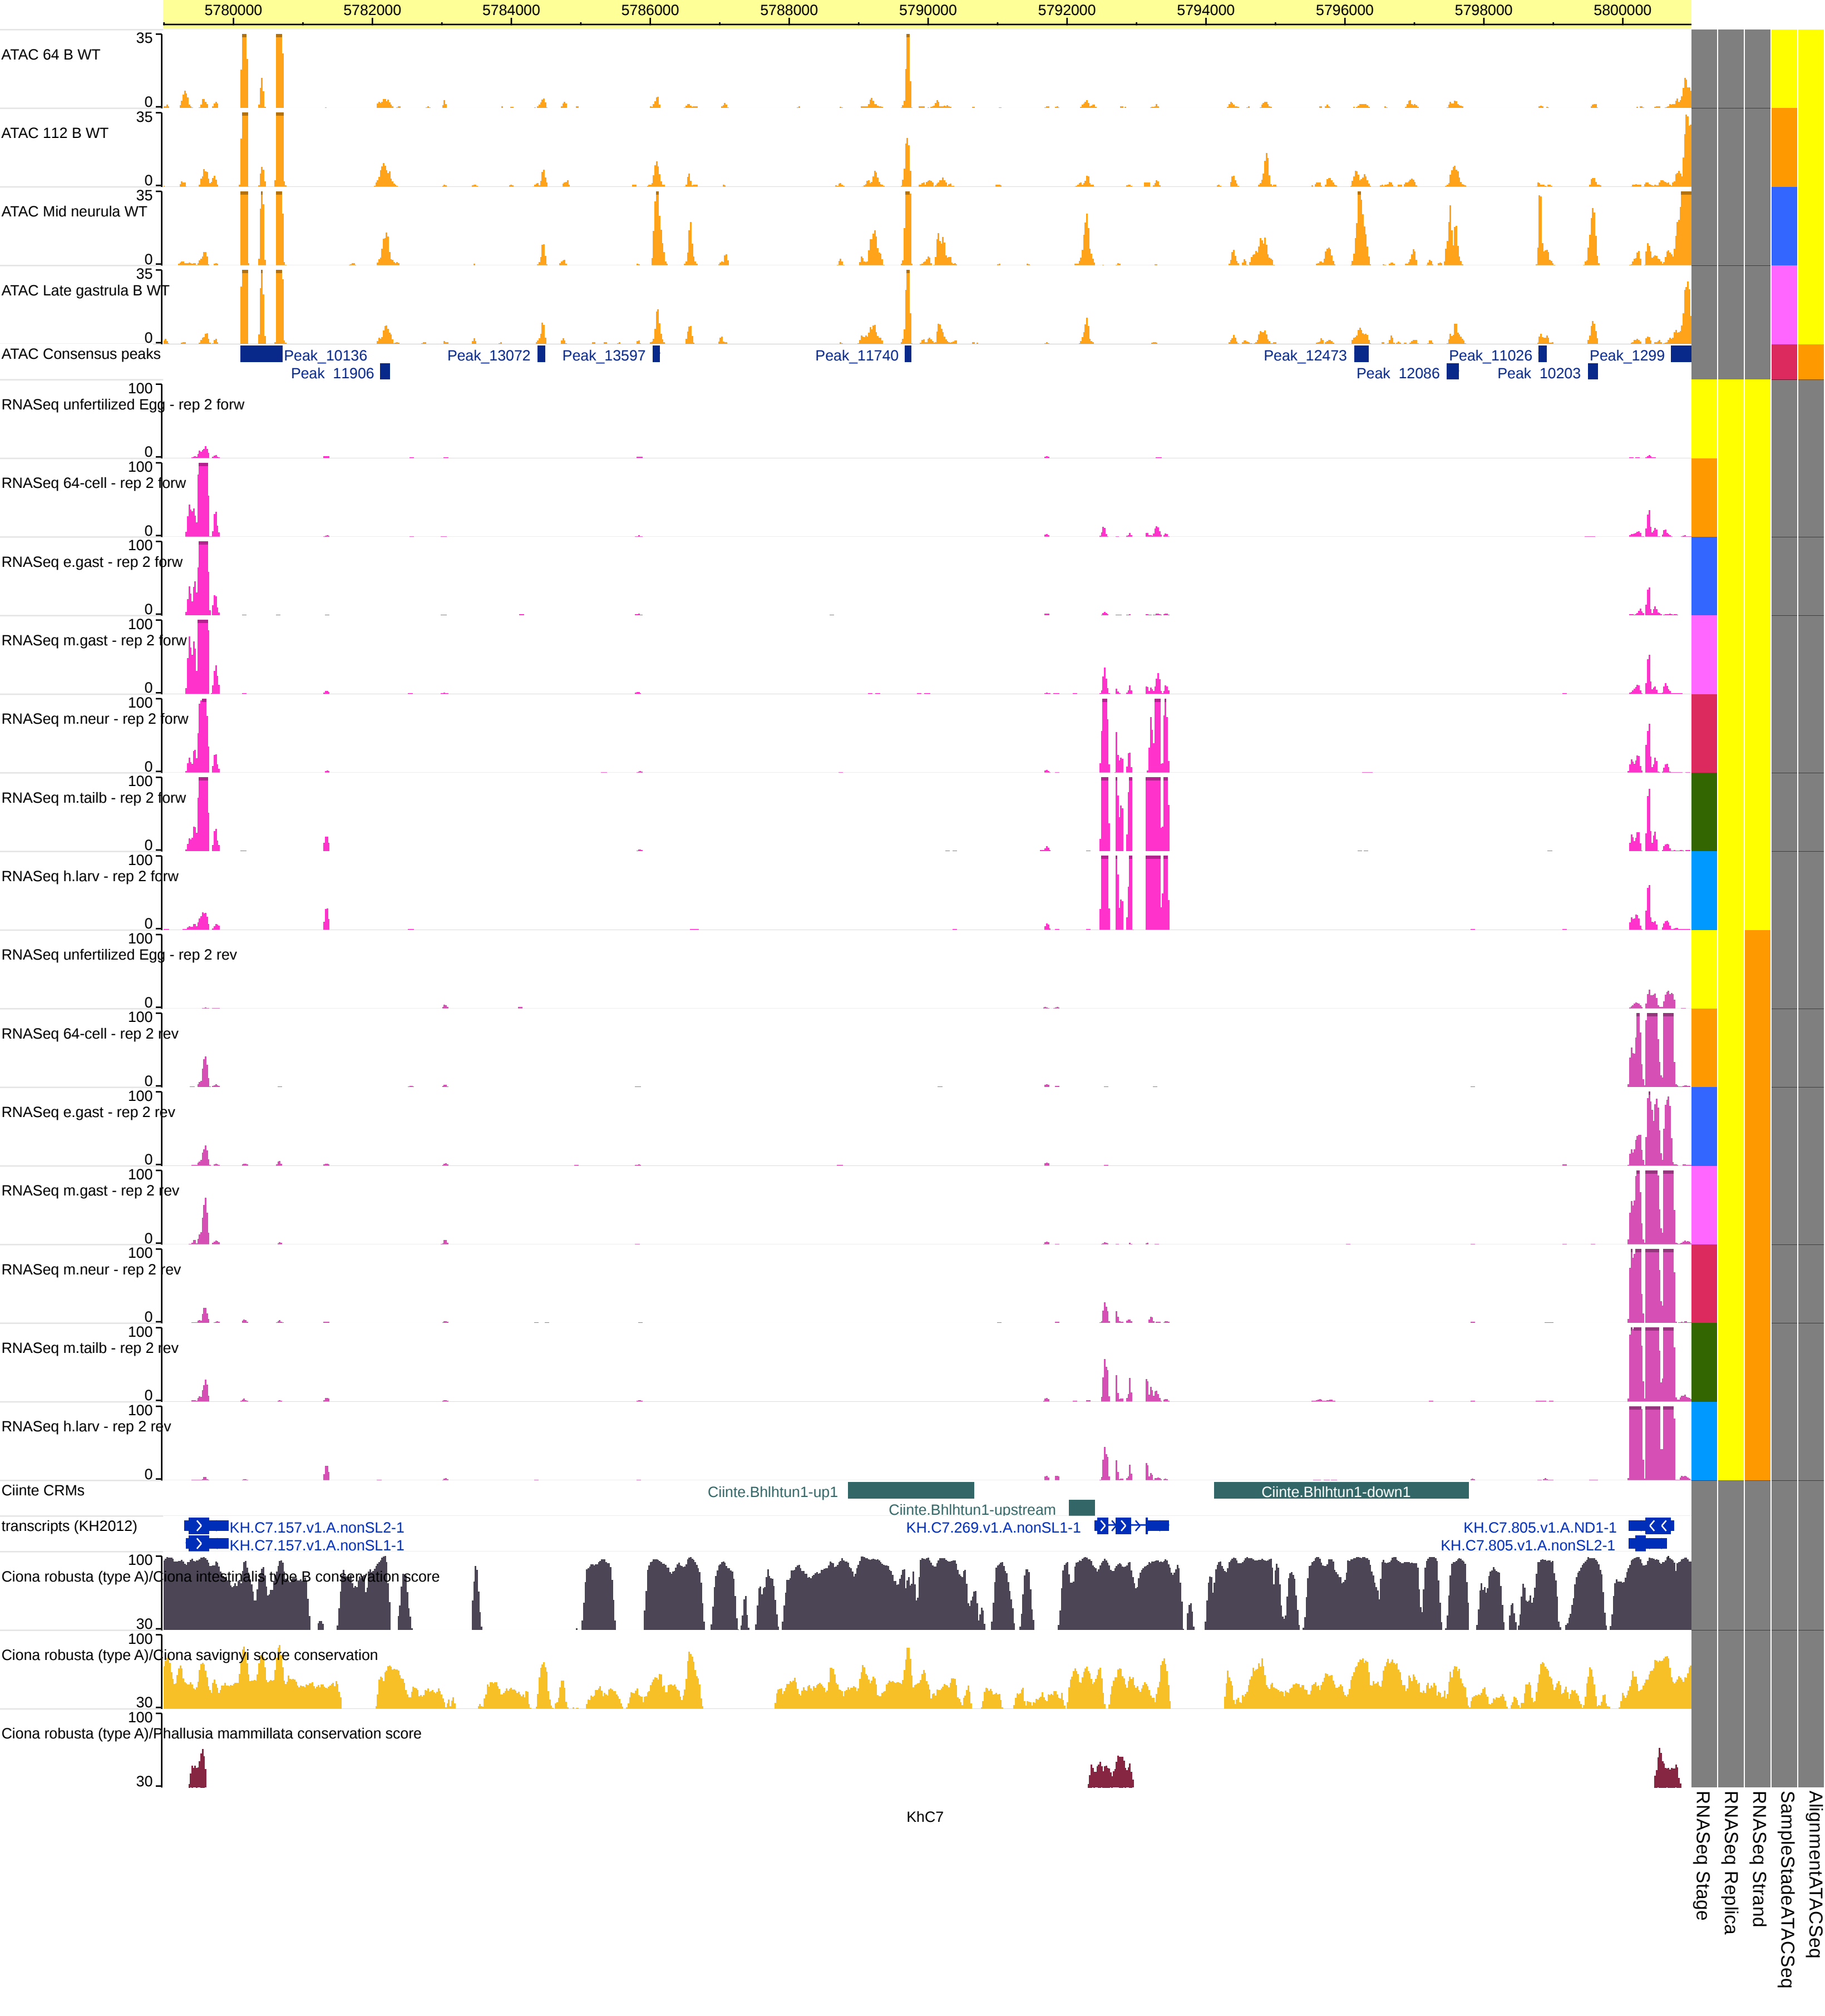

Supplement: supp [file elife-59157-supp-v1.zip › elife_poa_e59157_Supplementary_file_2.pdf]

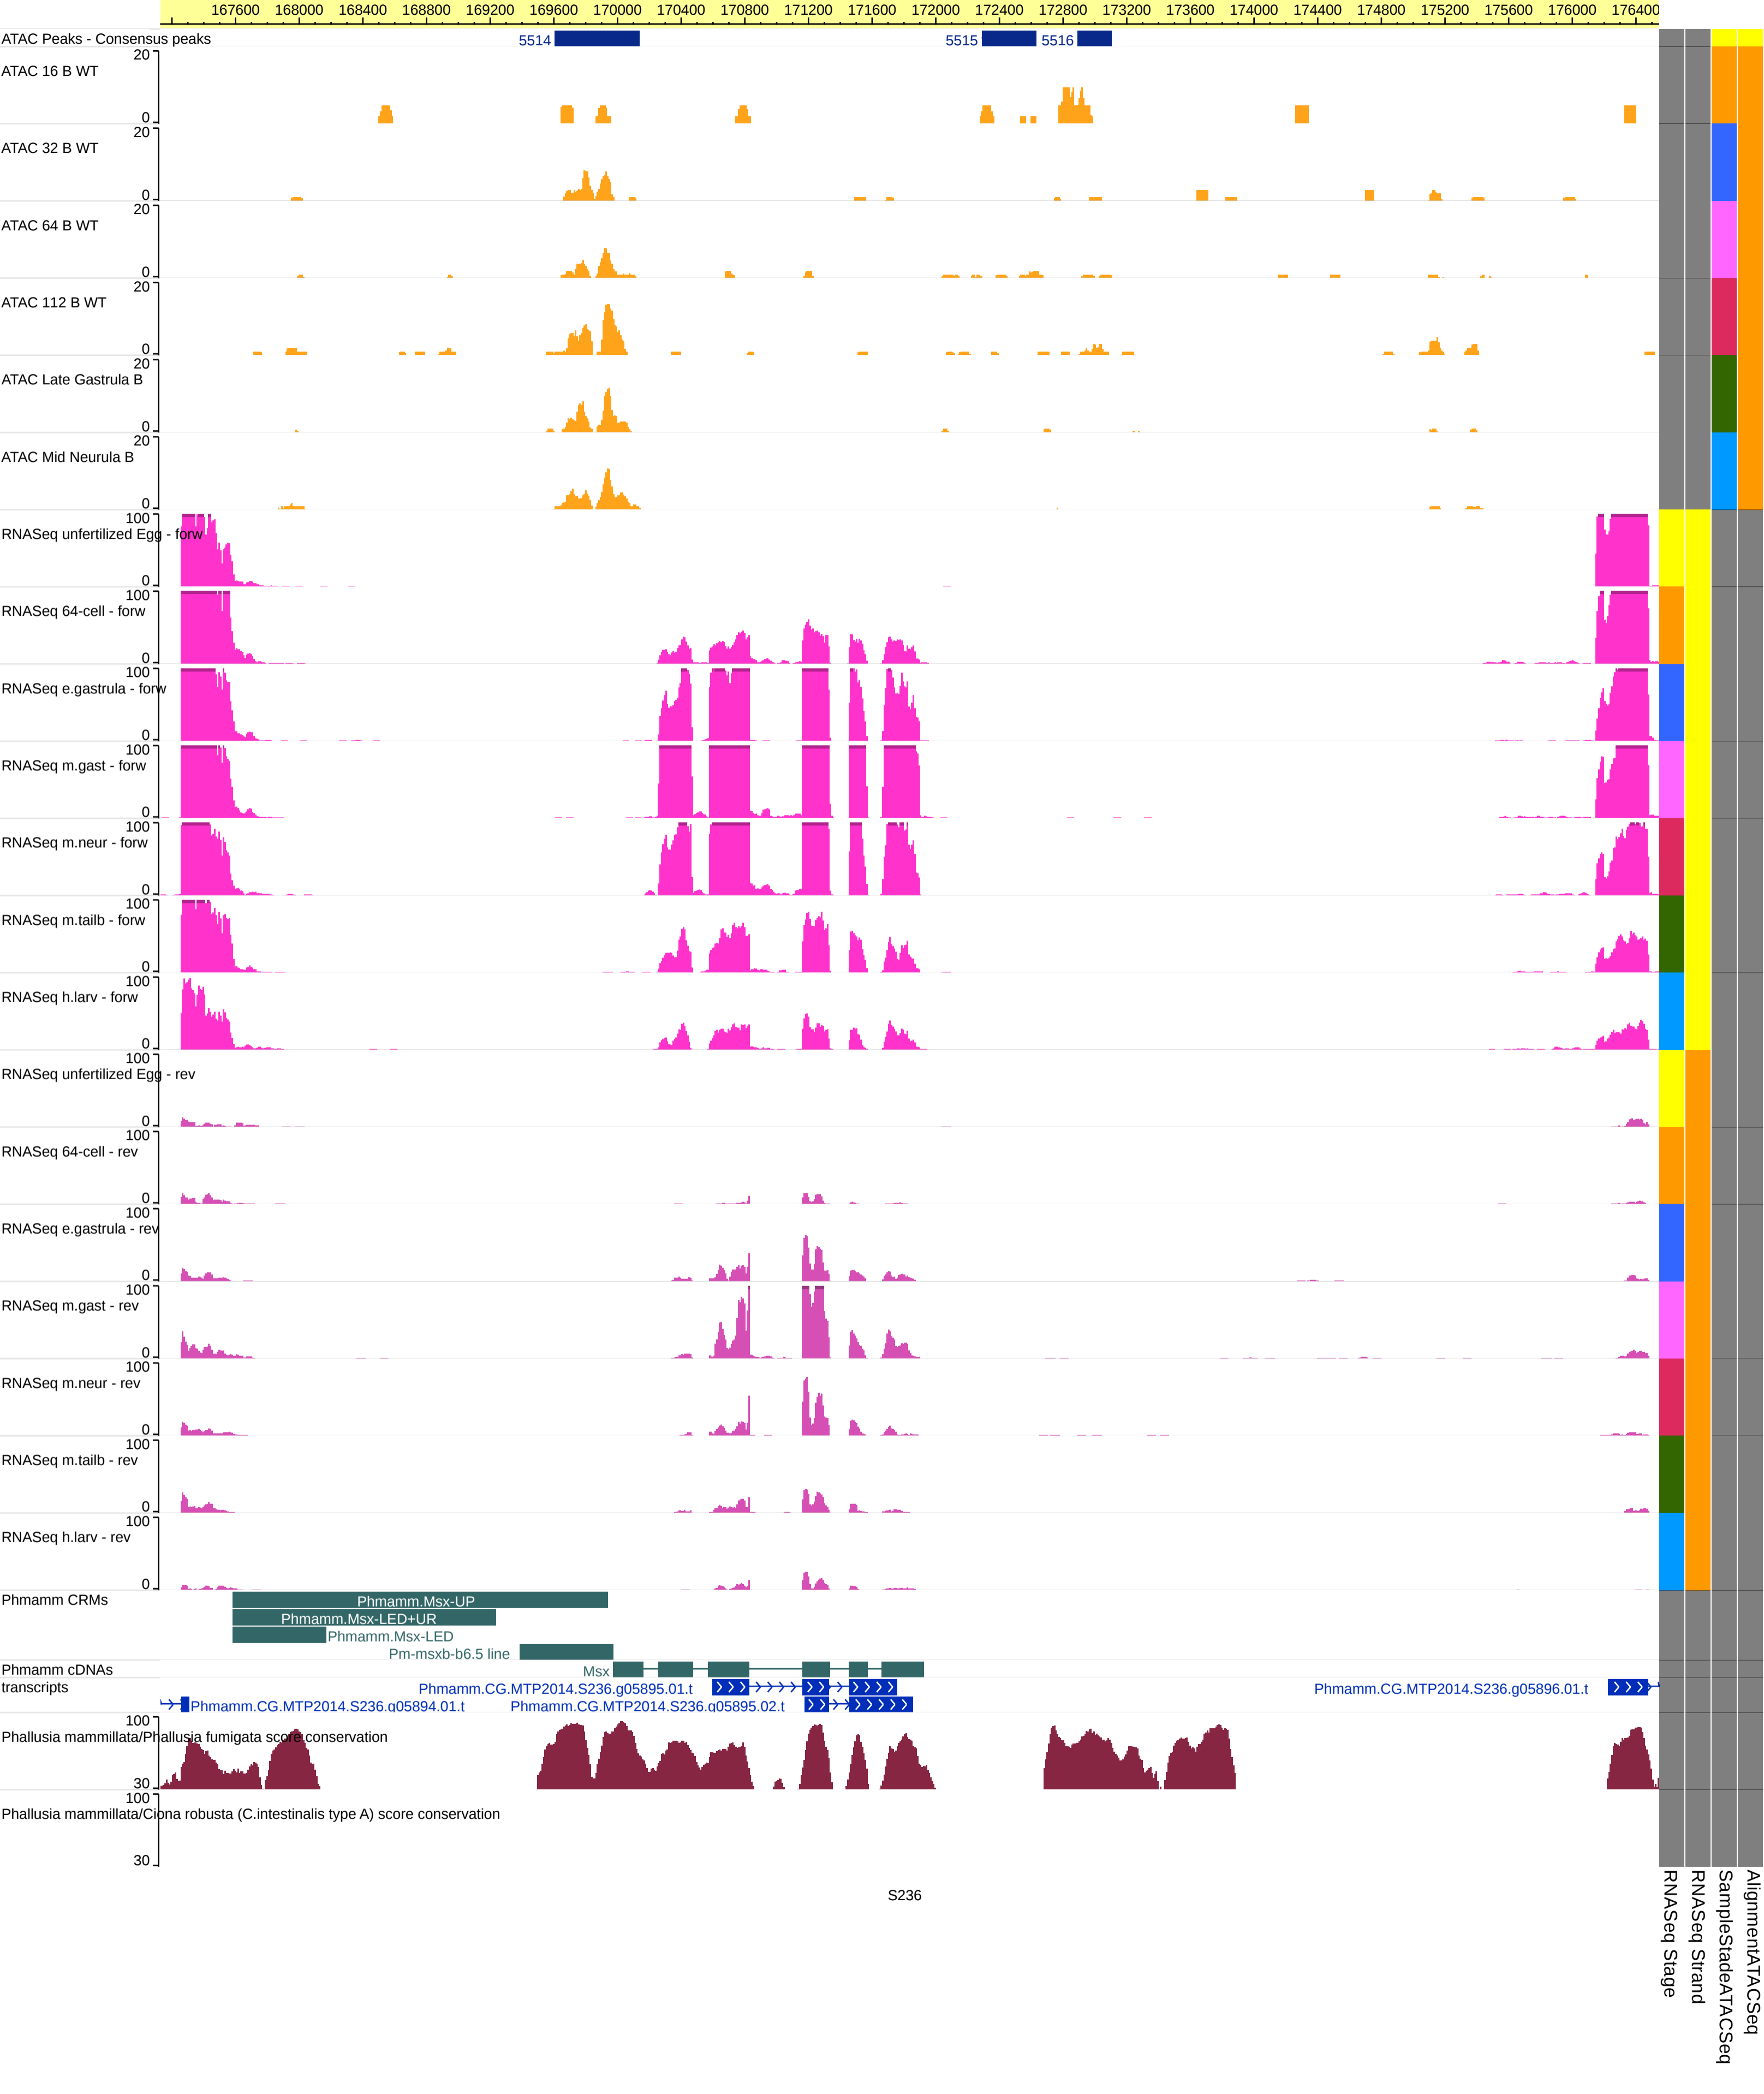

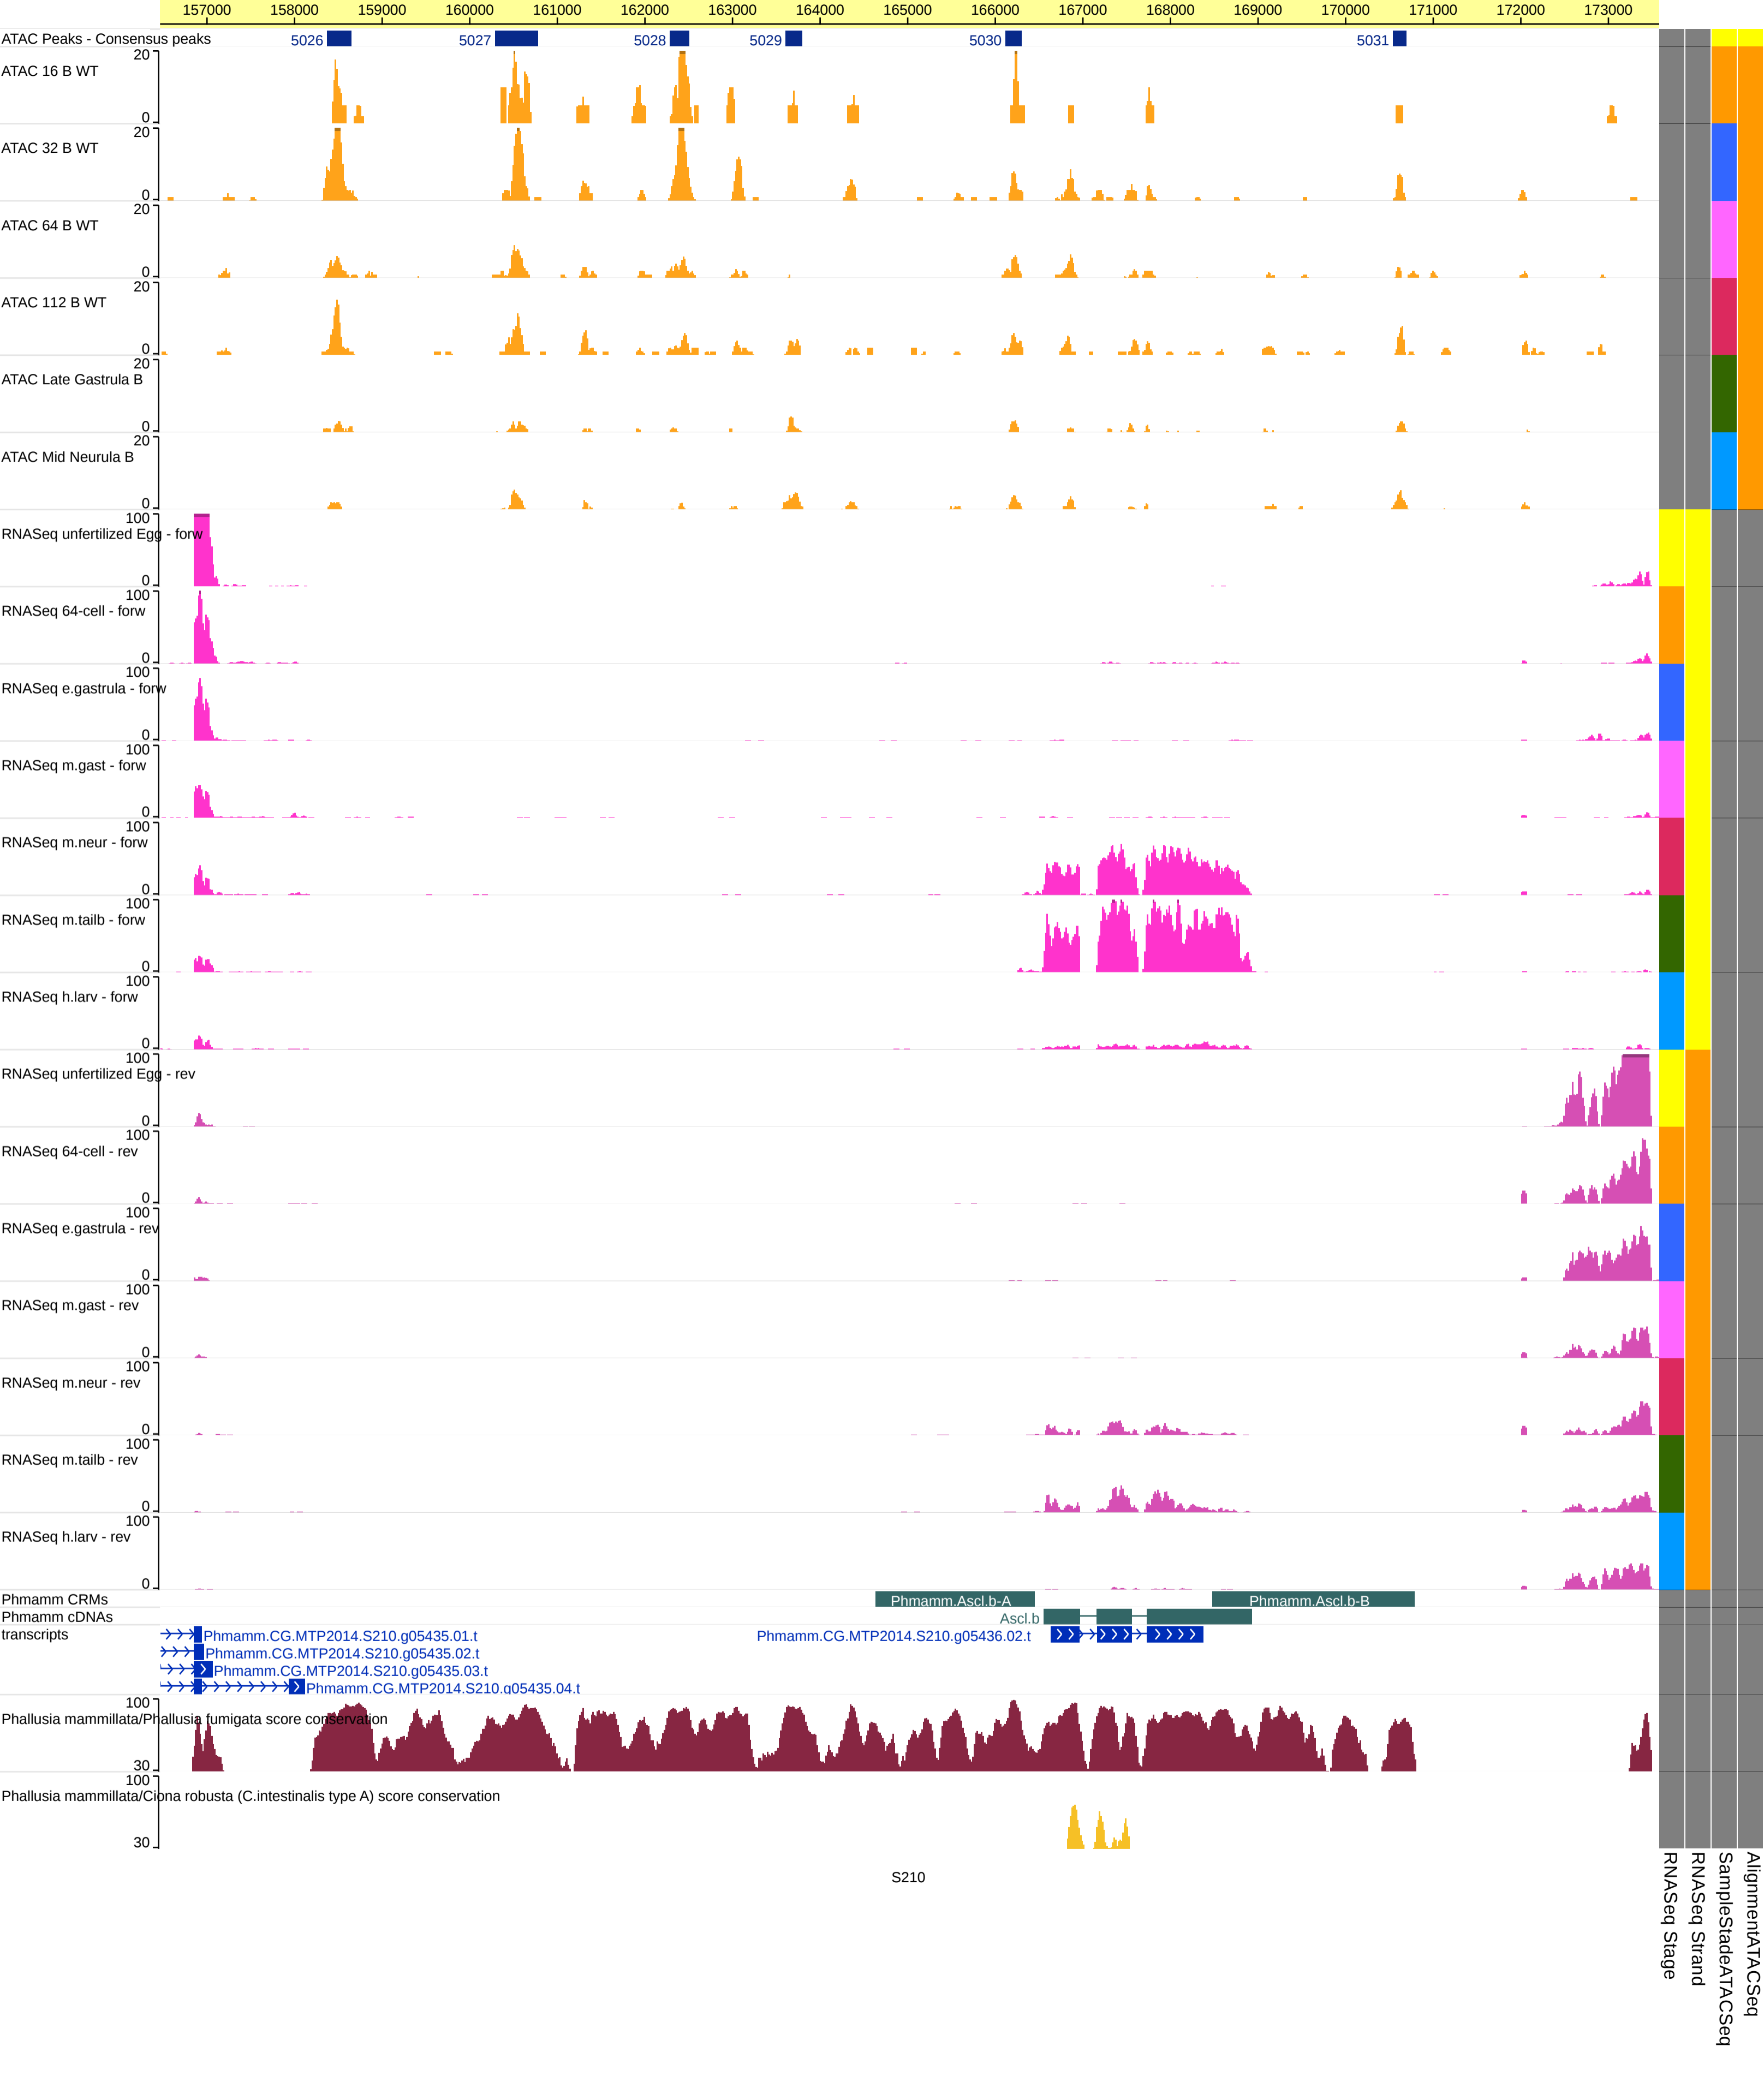

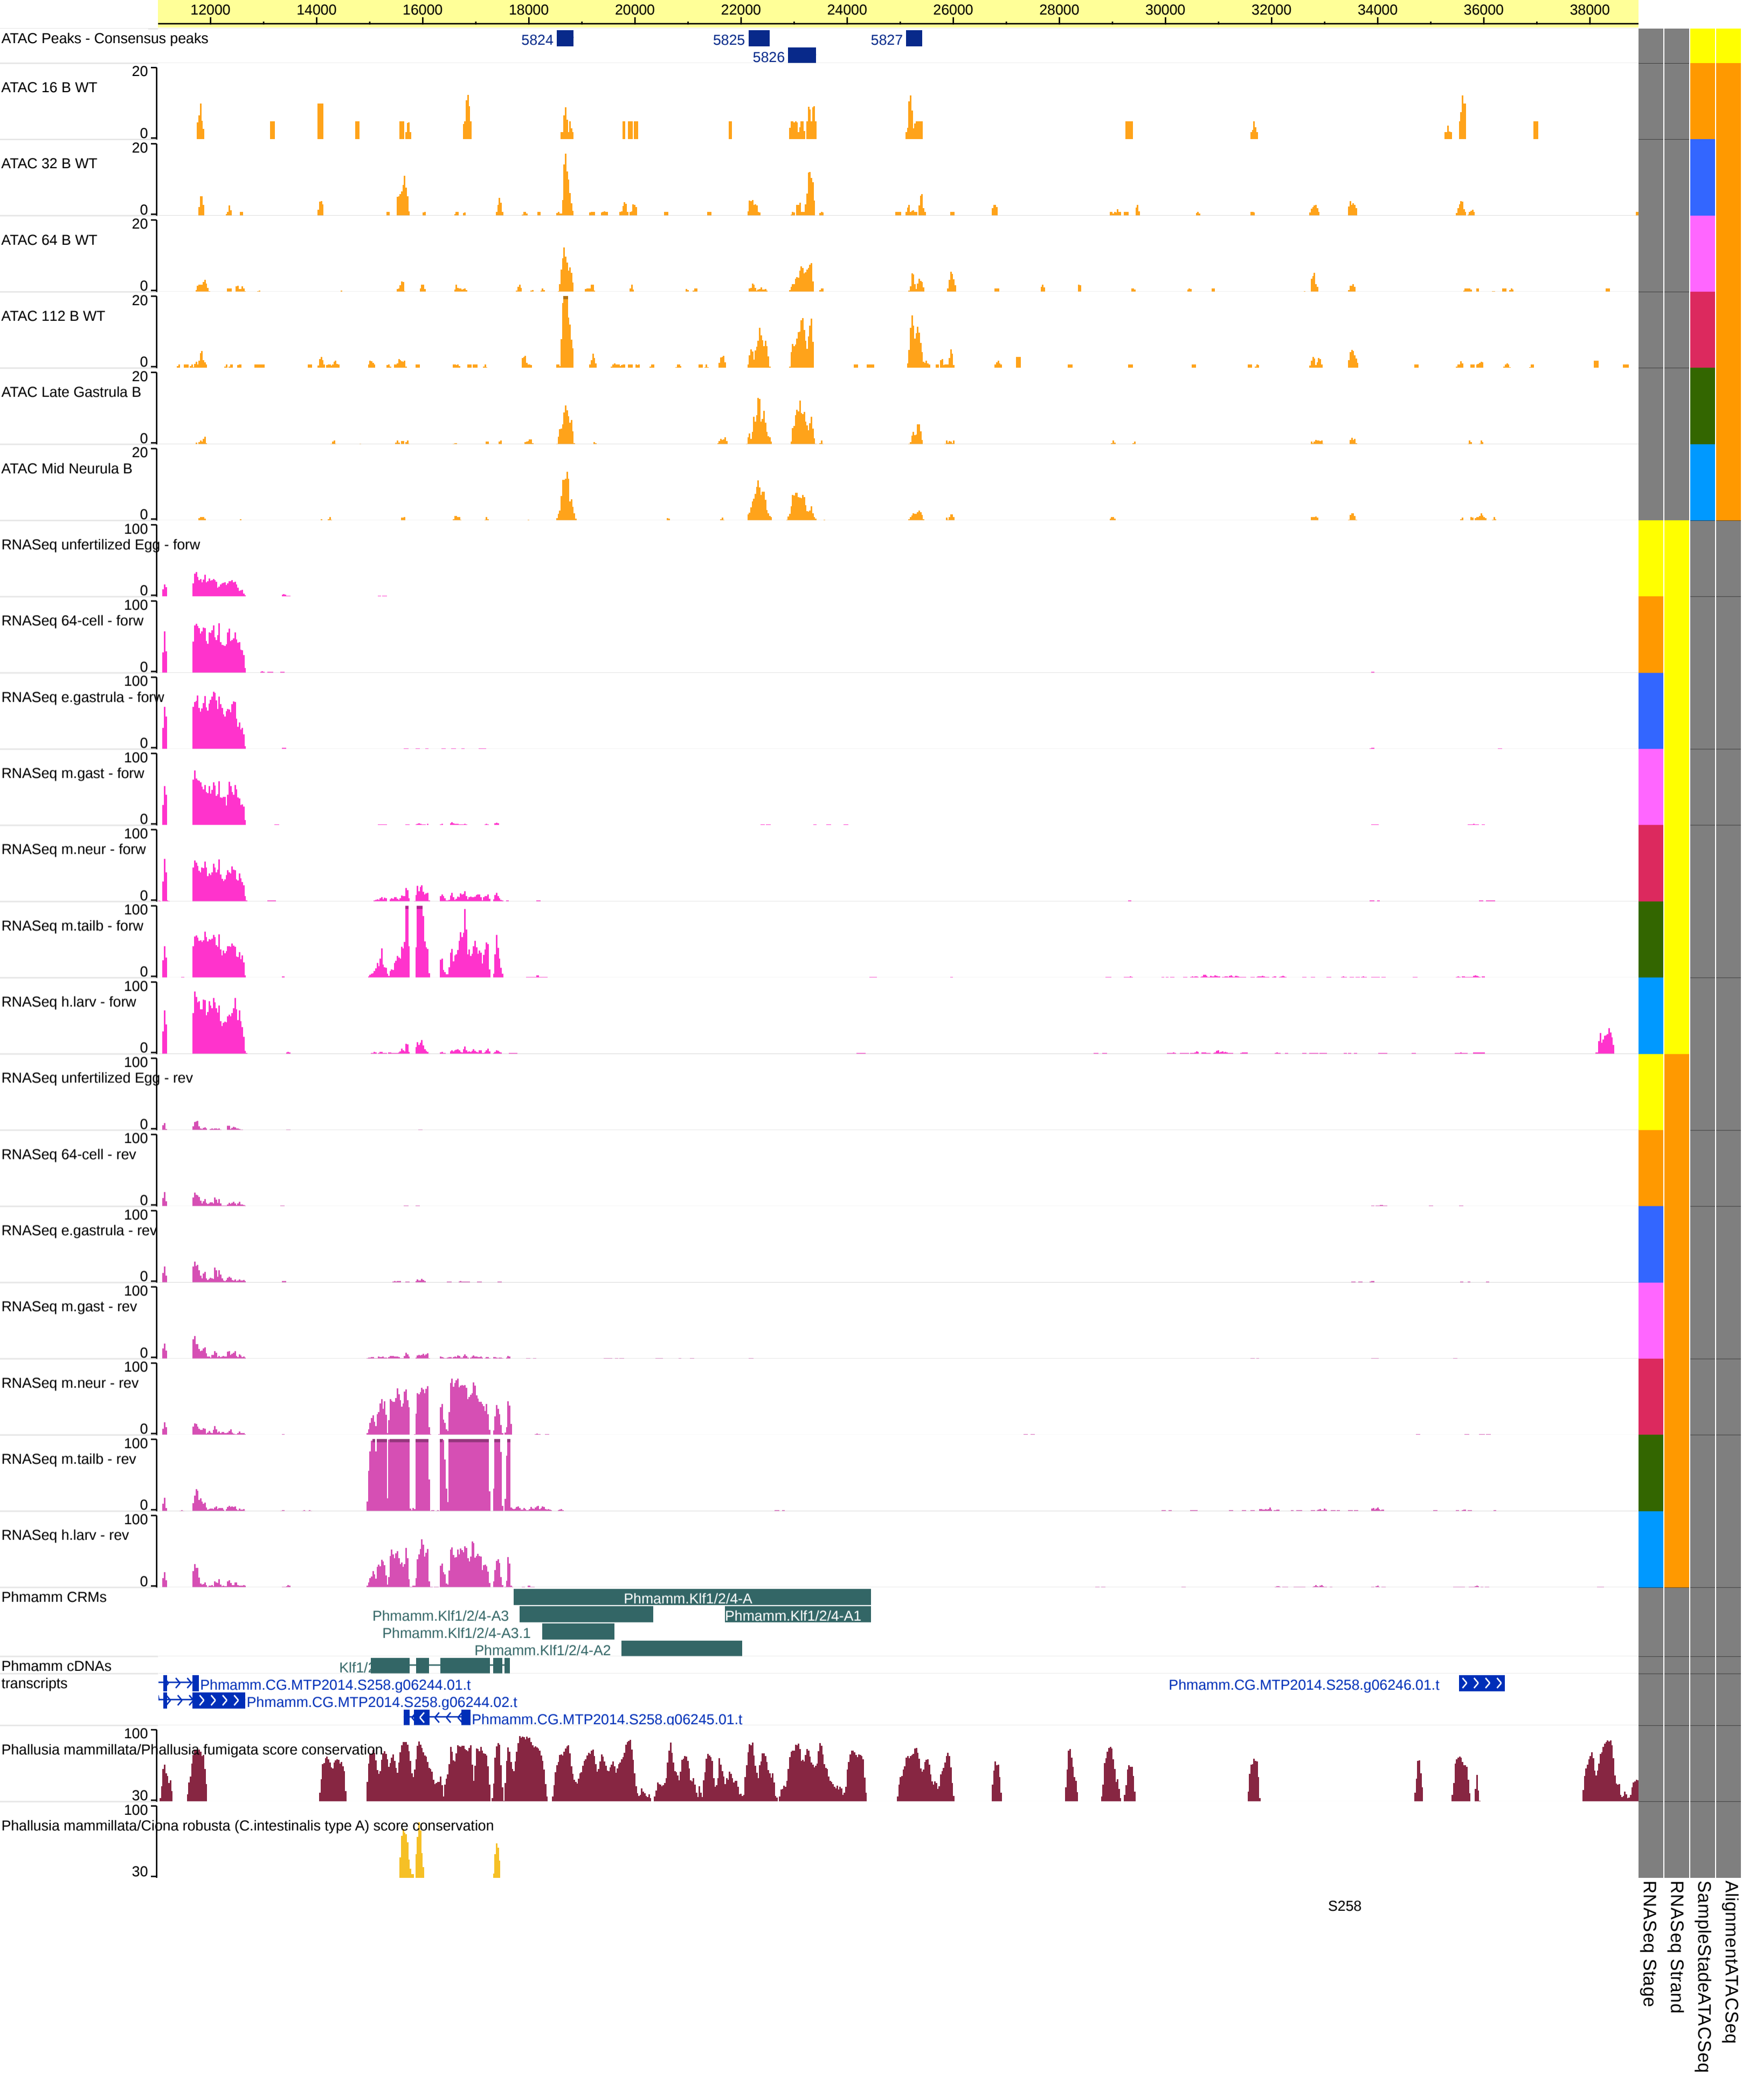

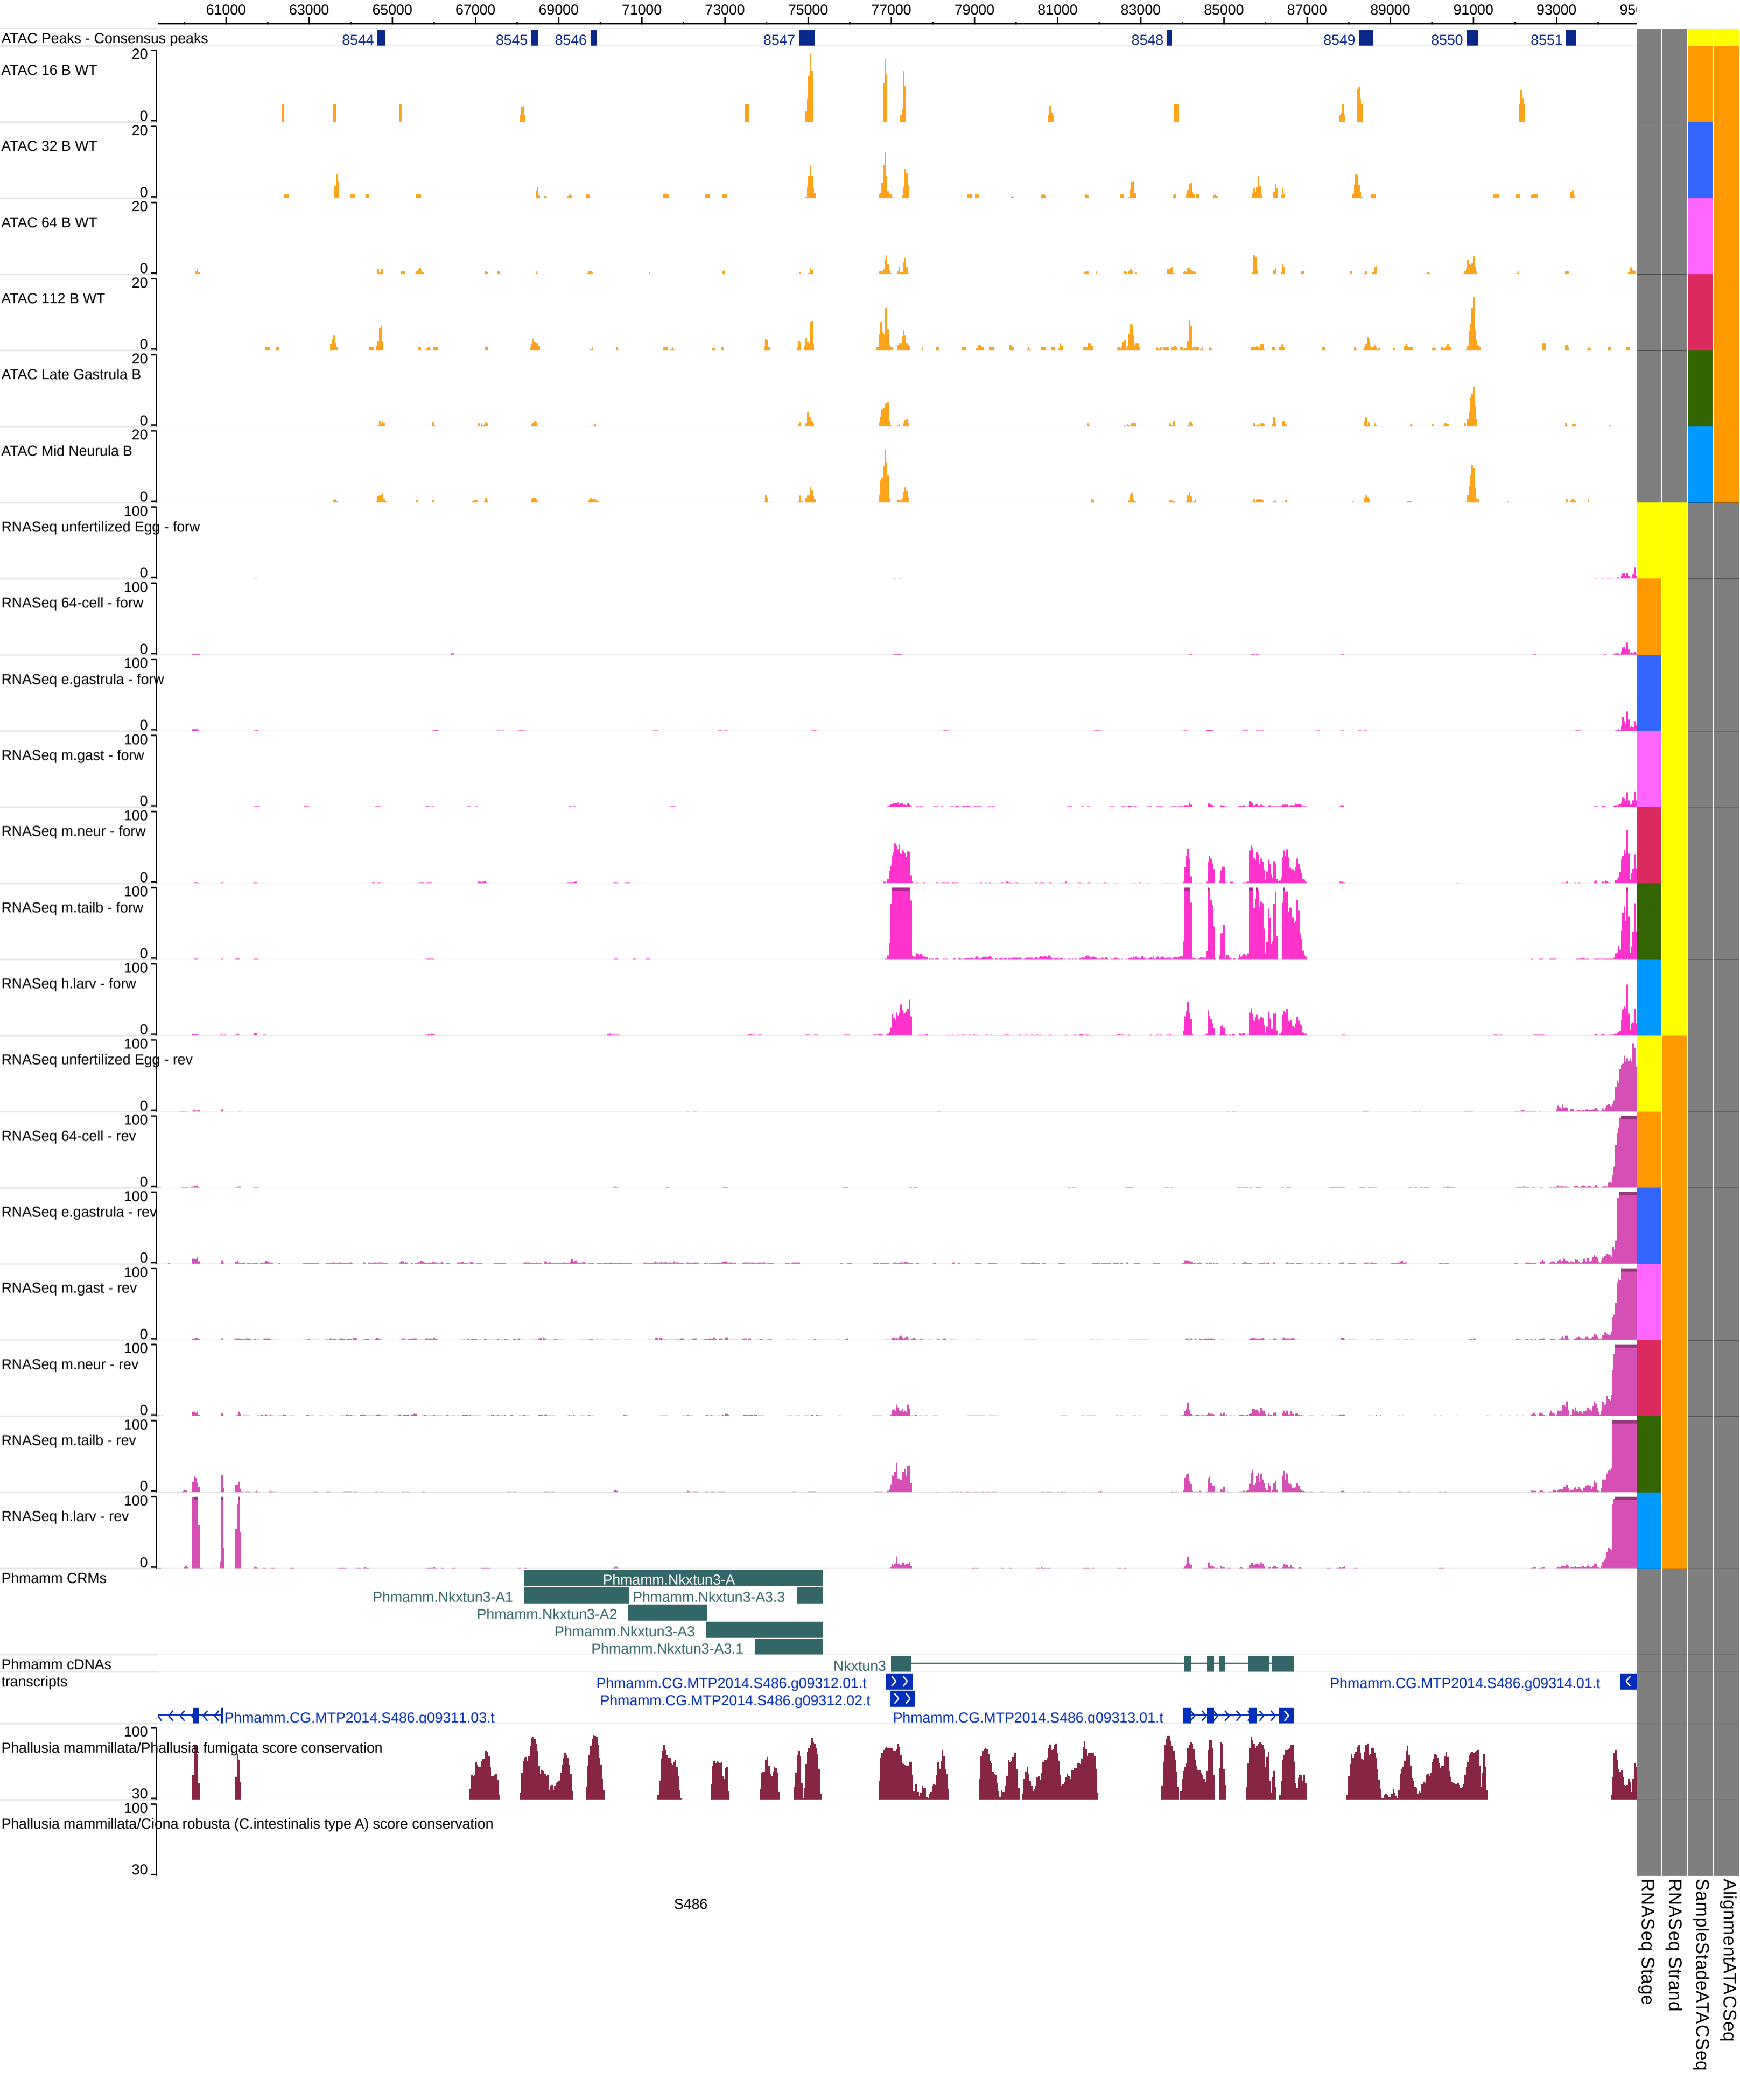

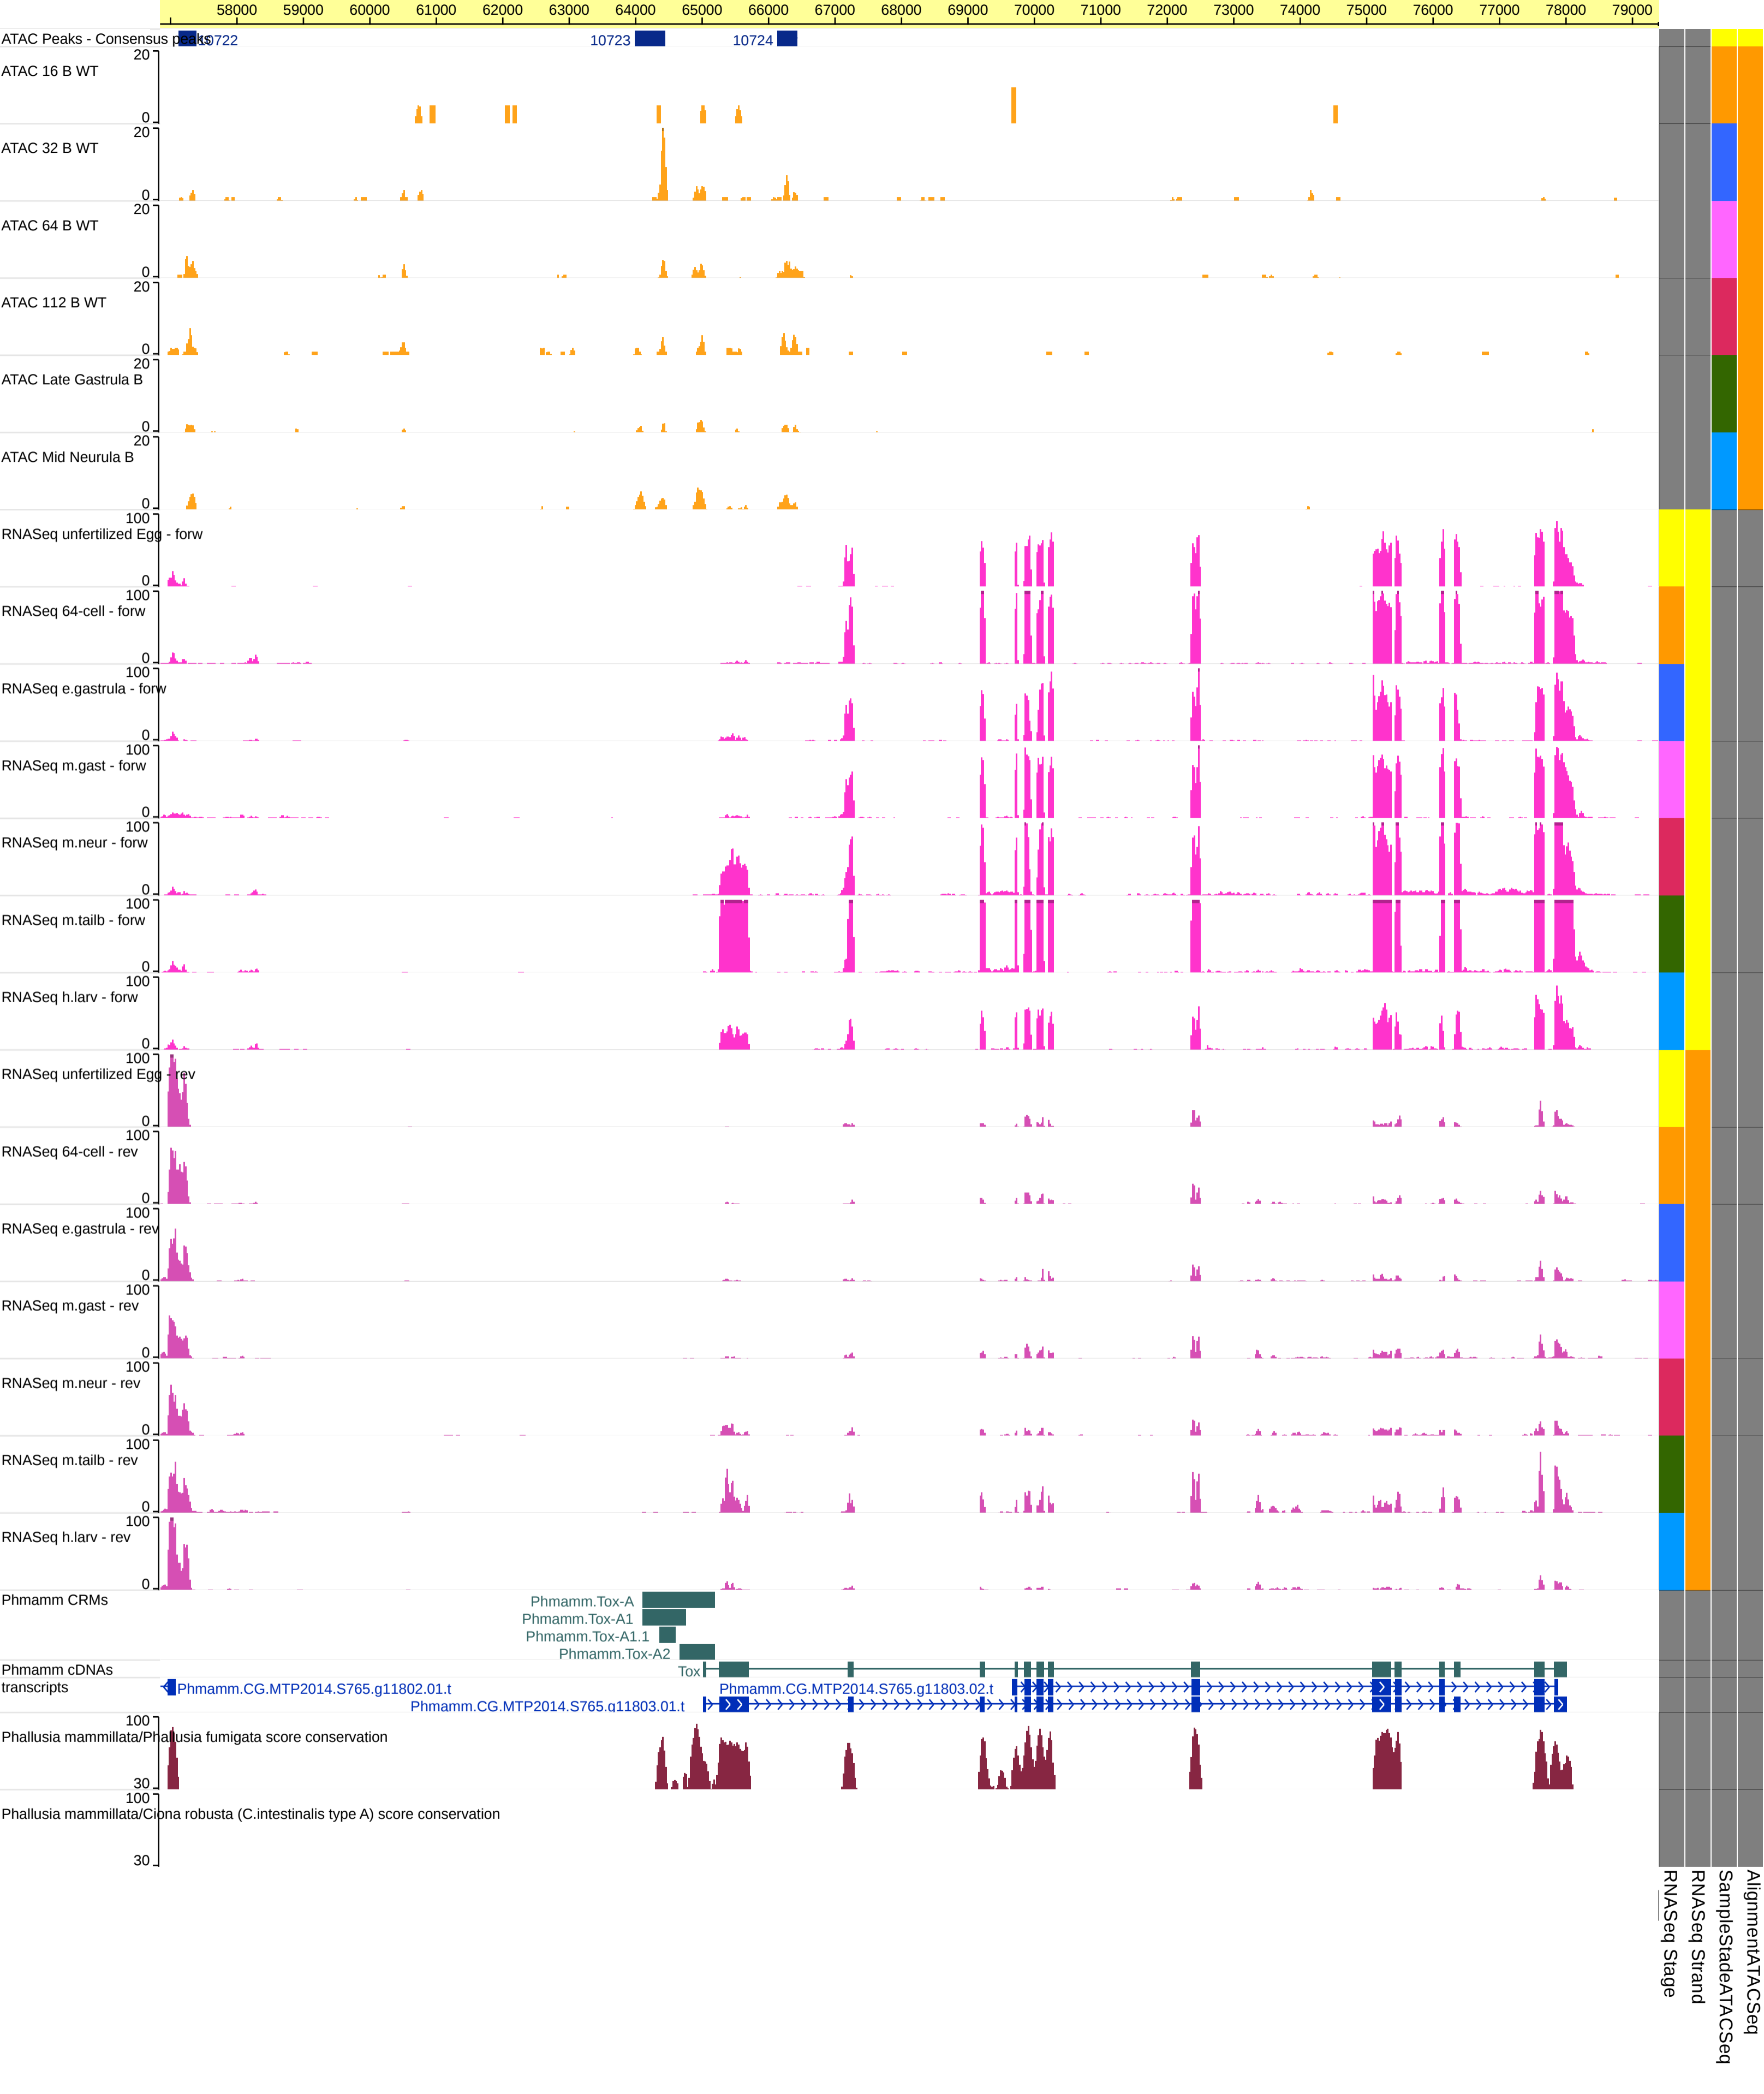

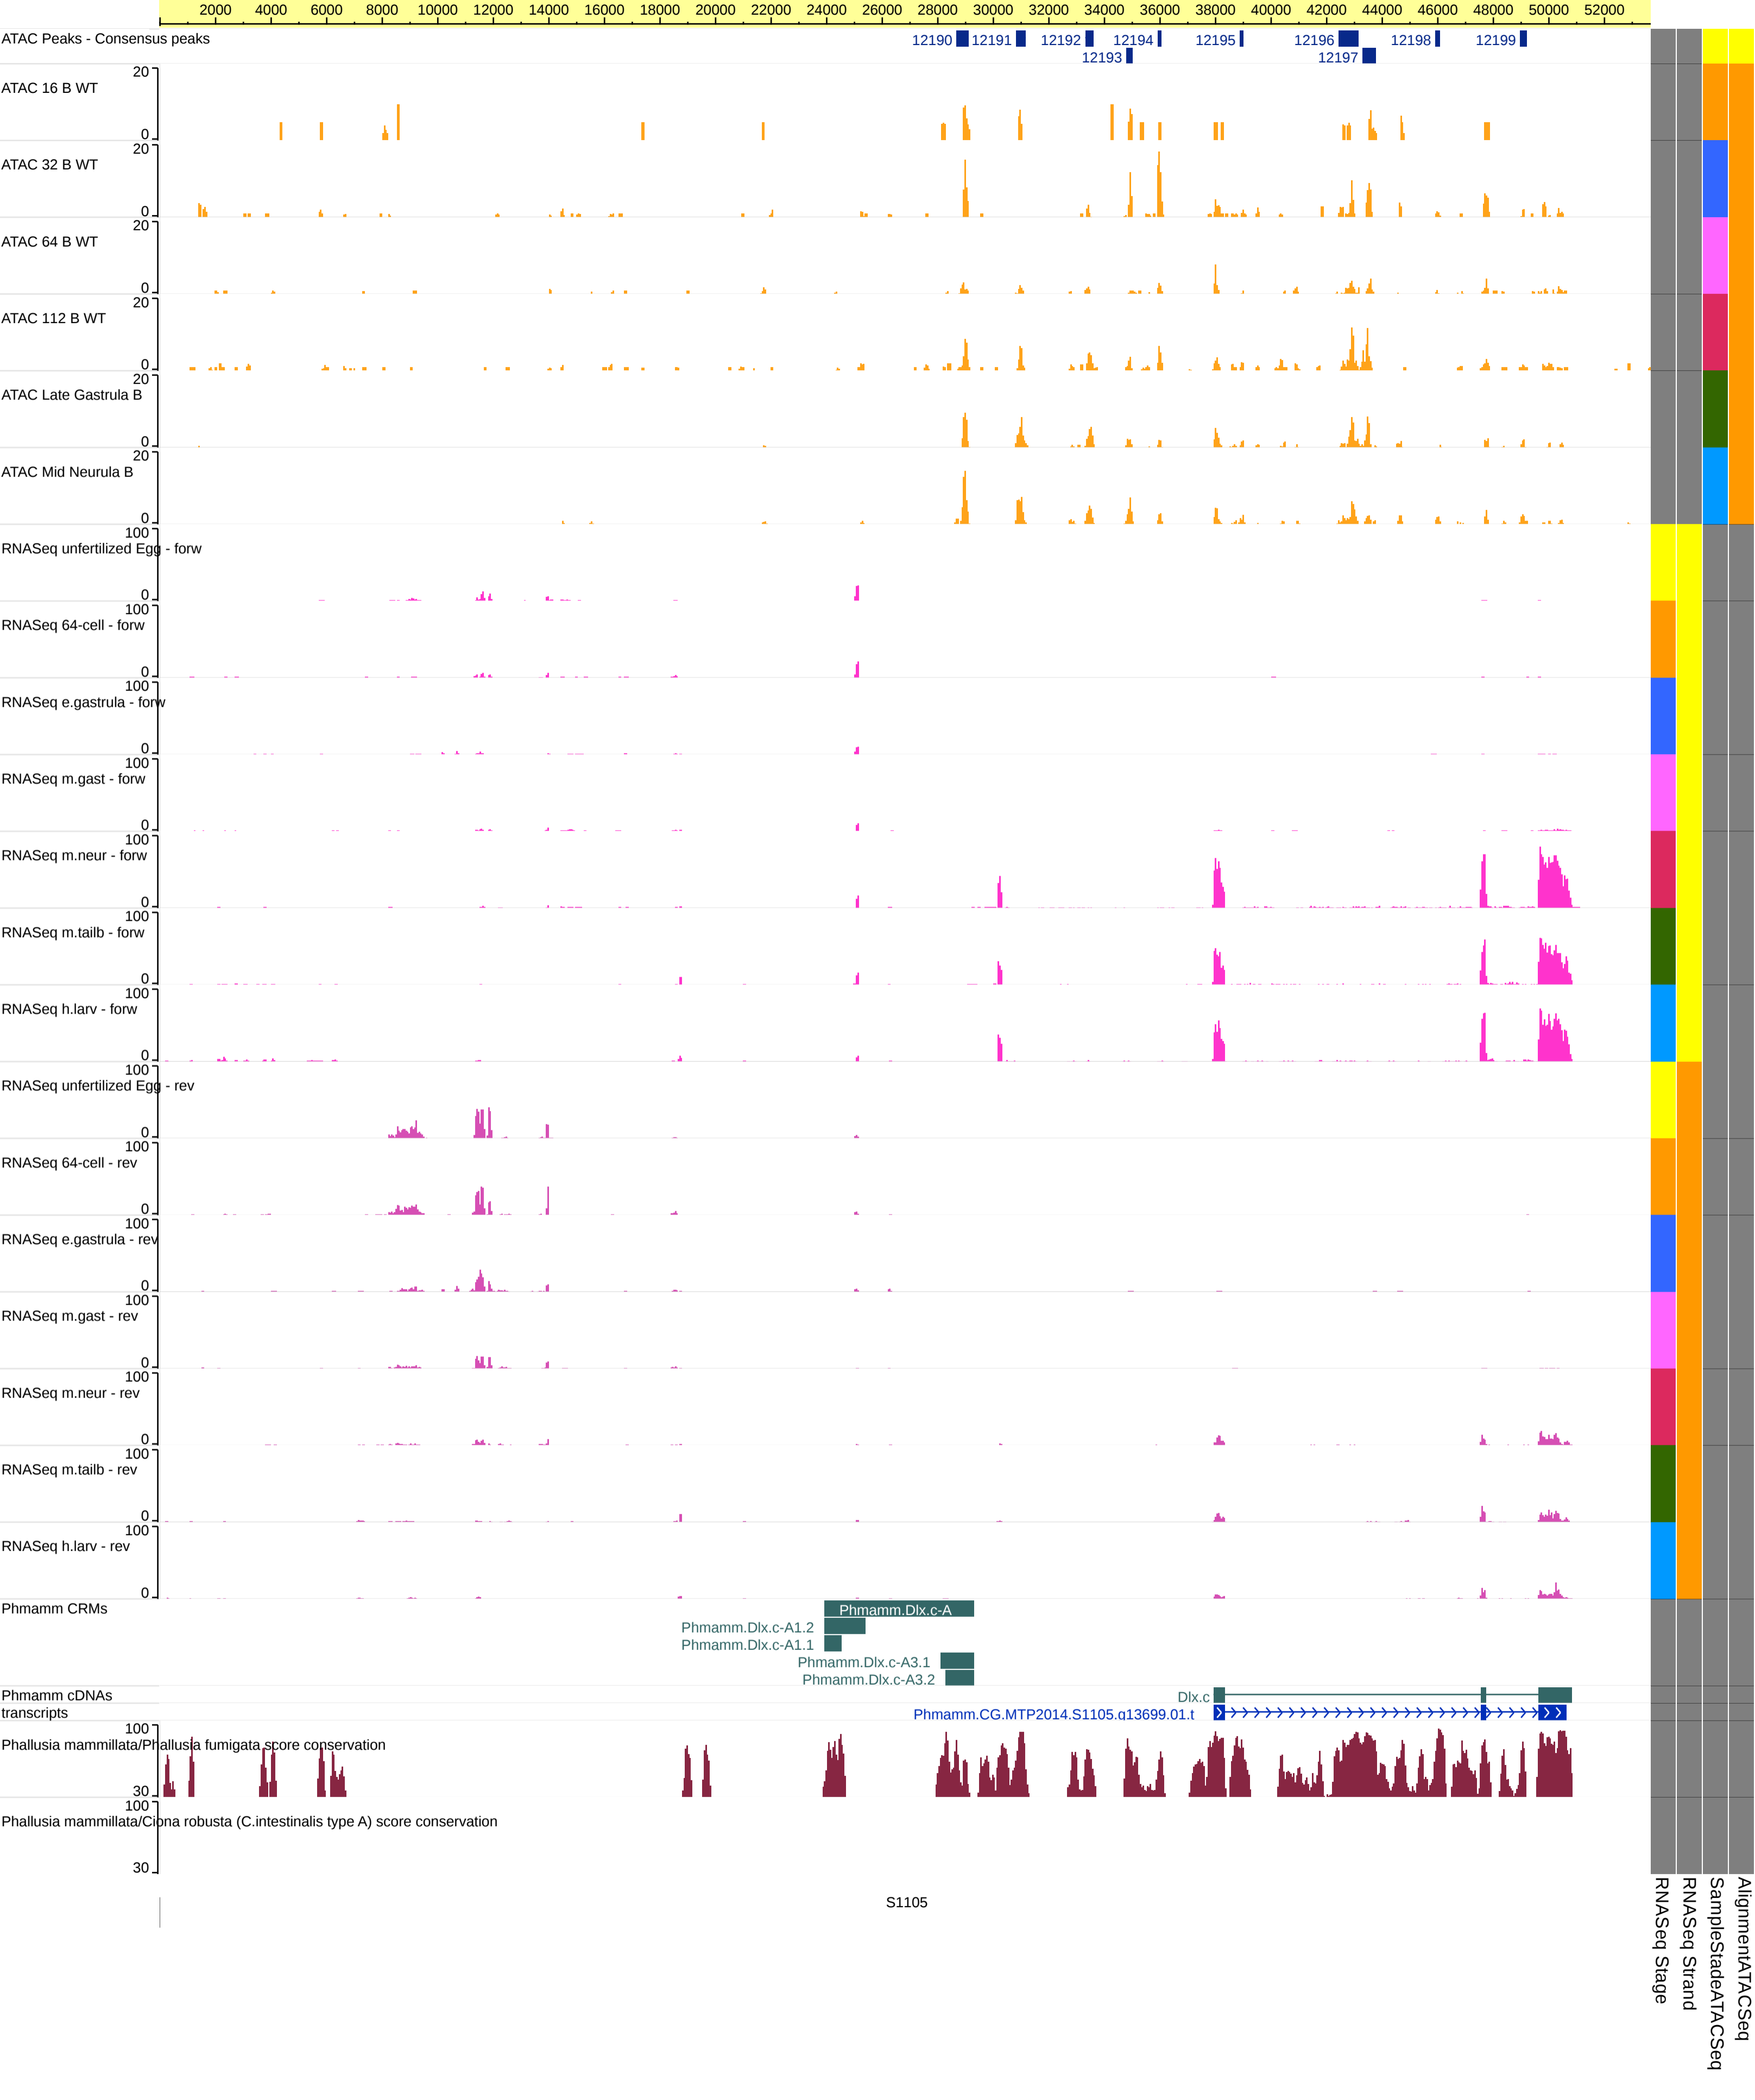

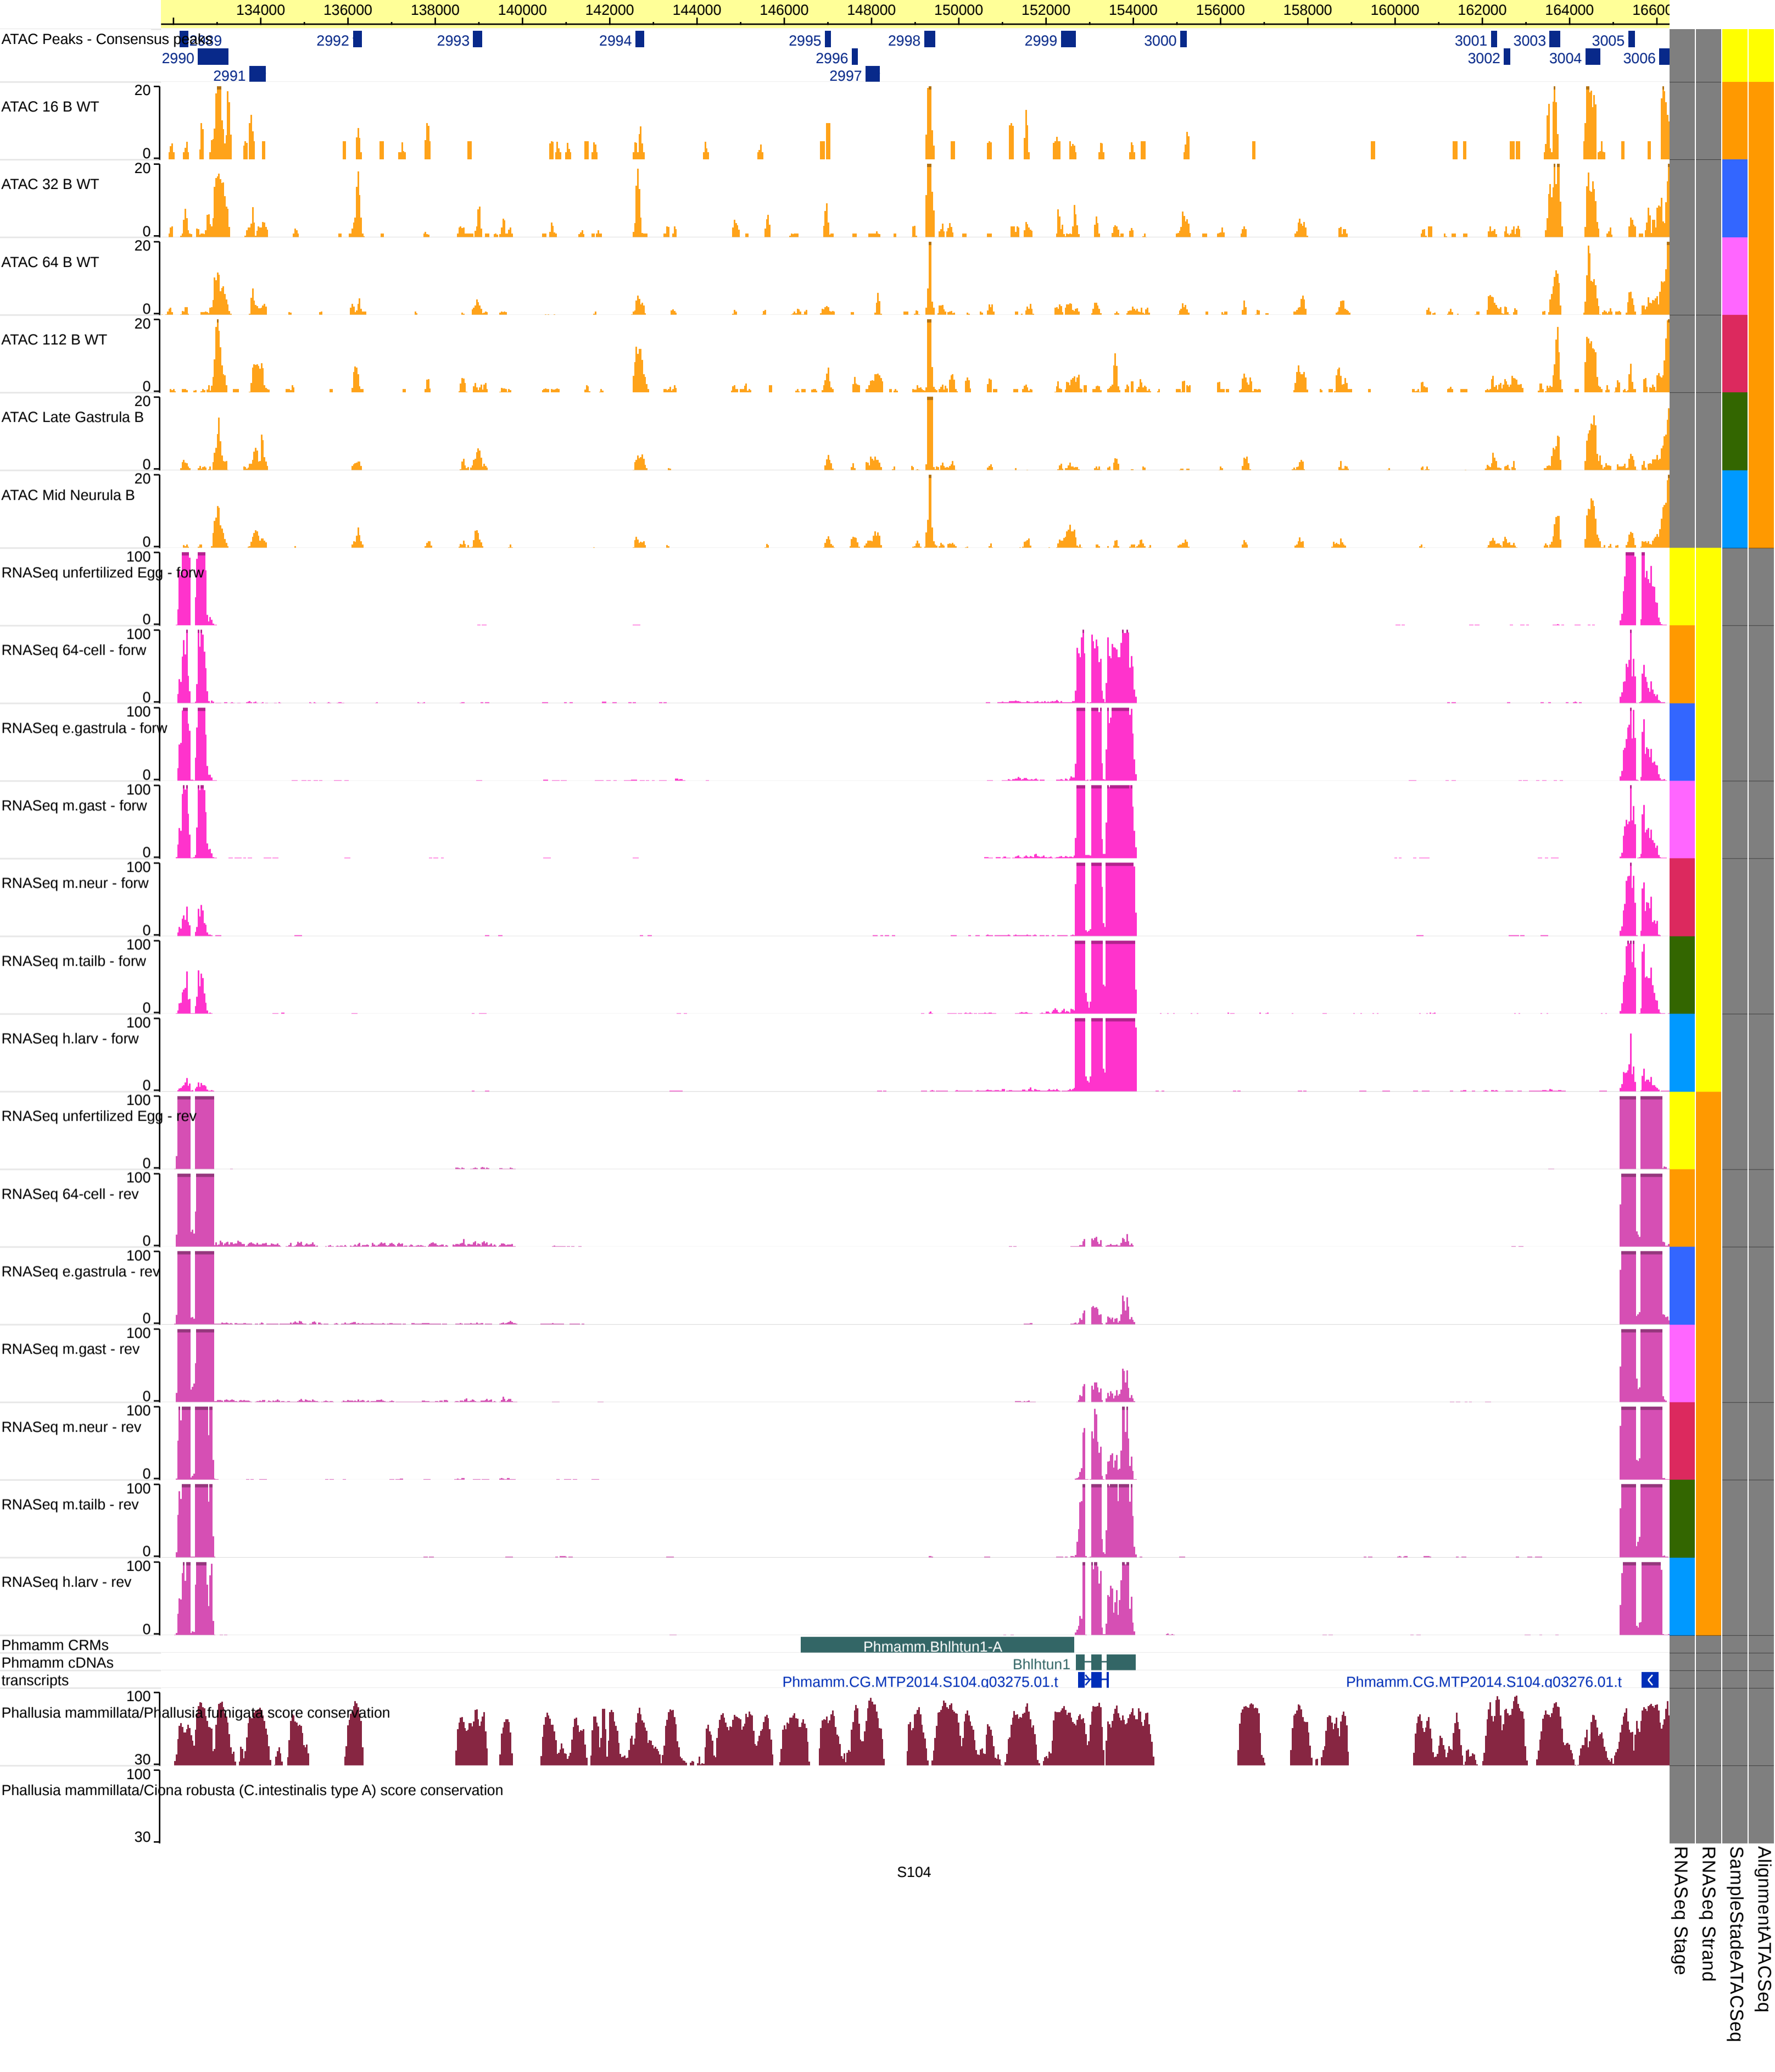

Supplement: supp [file elife-59157-supp-v1.zip › elife_poa_e59157_Supplementary_file_5.pdf]

S143

27600 28000 28400 28800 29200 29600 30000 30400 30800 31200 31600 32000 32400 32800 33200 33600 34000 34400 34800 35200 35600 36000

Phfumi CRM

Phfumi.Msx-up

Phfumi cDNA

Msx

transcripts

[Phfumi.CG.MTP2014.S143.g01156.01.t](#)[Phfumi.CG.MTP2014.S143.g01159.01.t](#)

&gt;&gt;

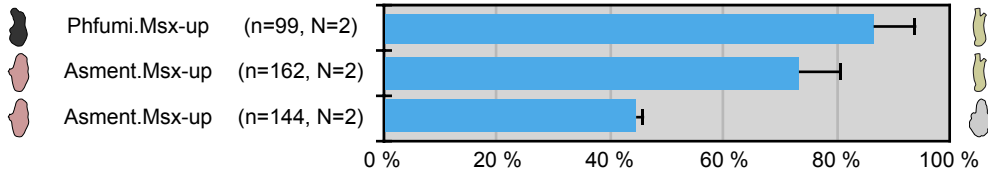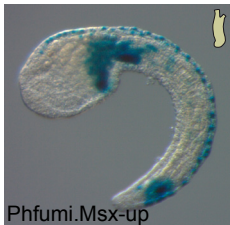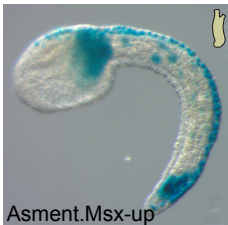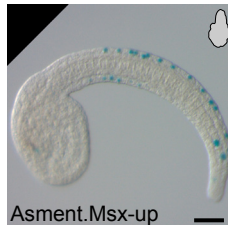

Supplement: supp [file elife-59157-supp-v1.zip › elife_poa_e59157_Supplementary_file_6.pdf]

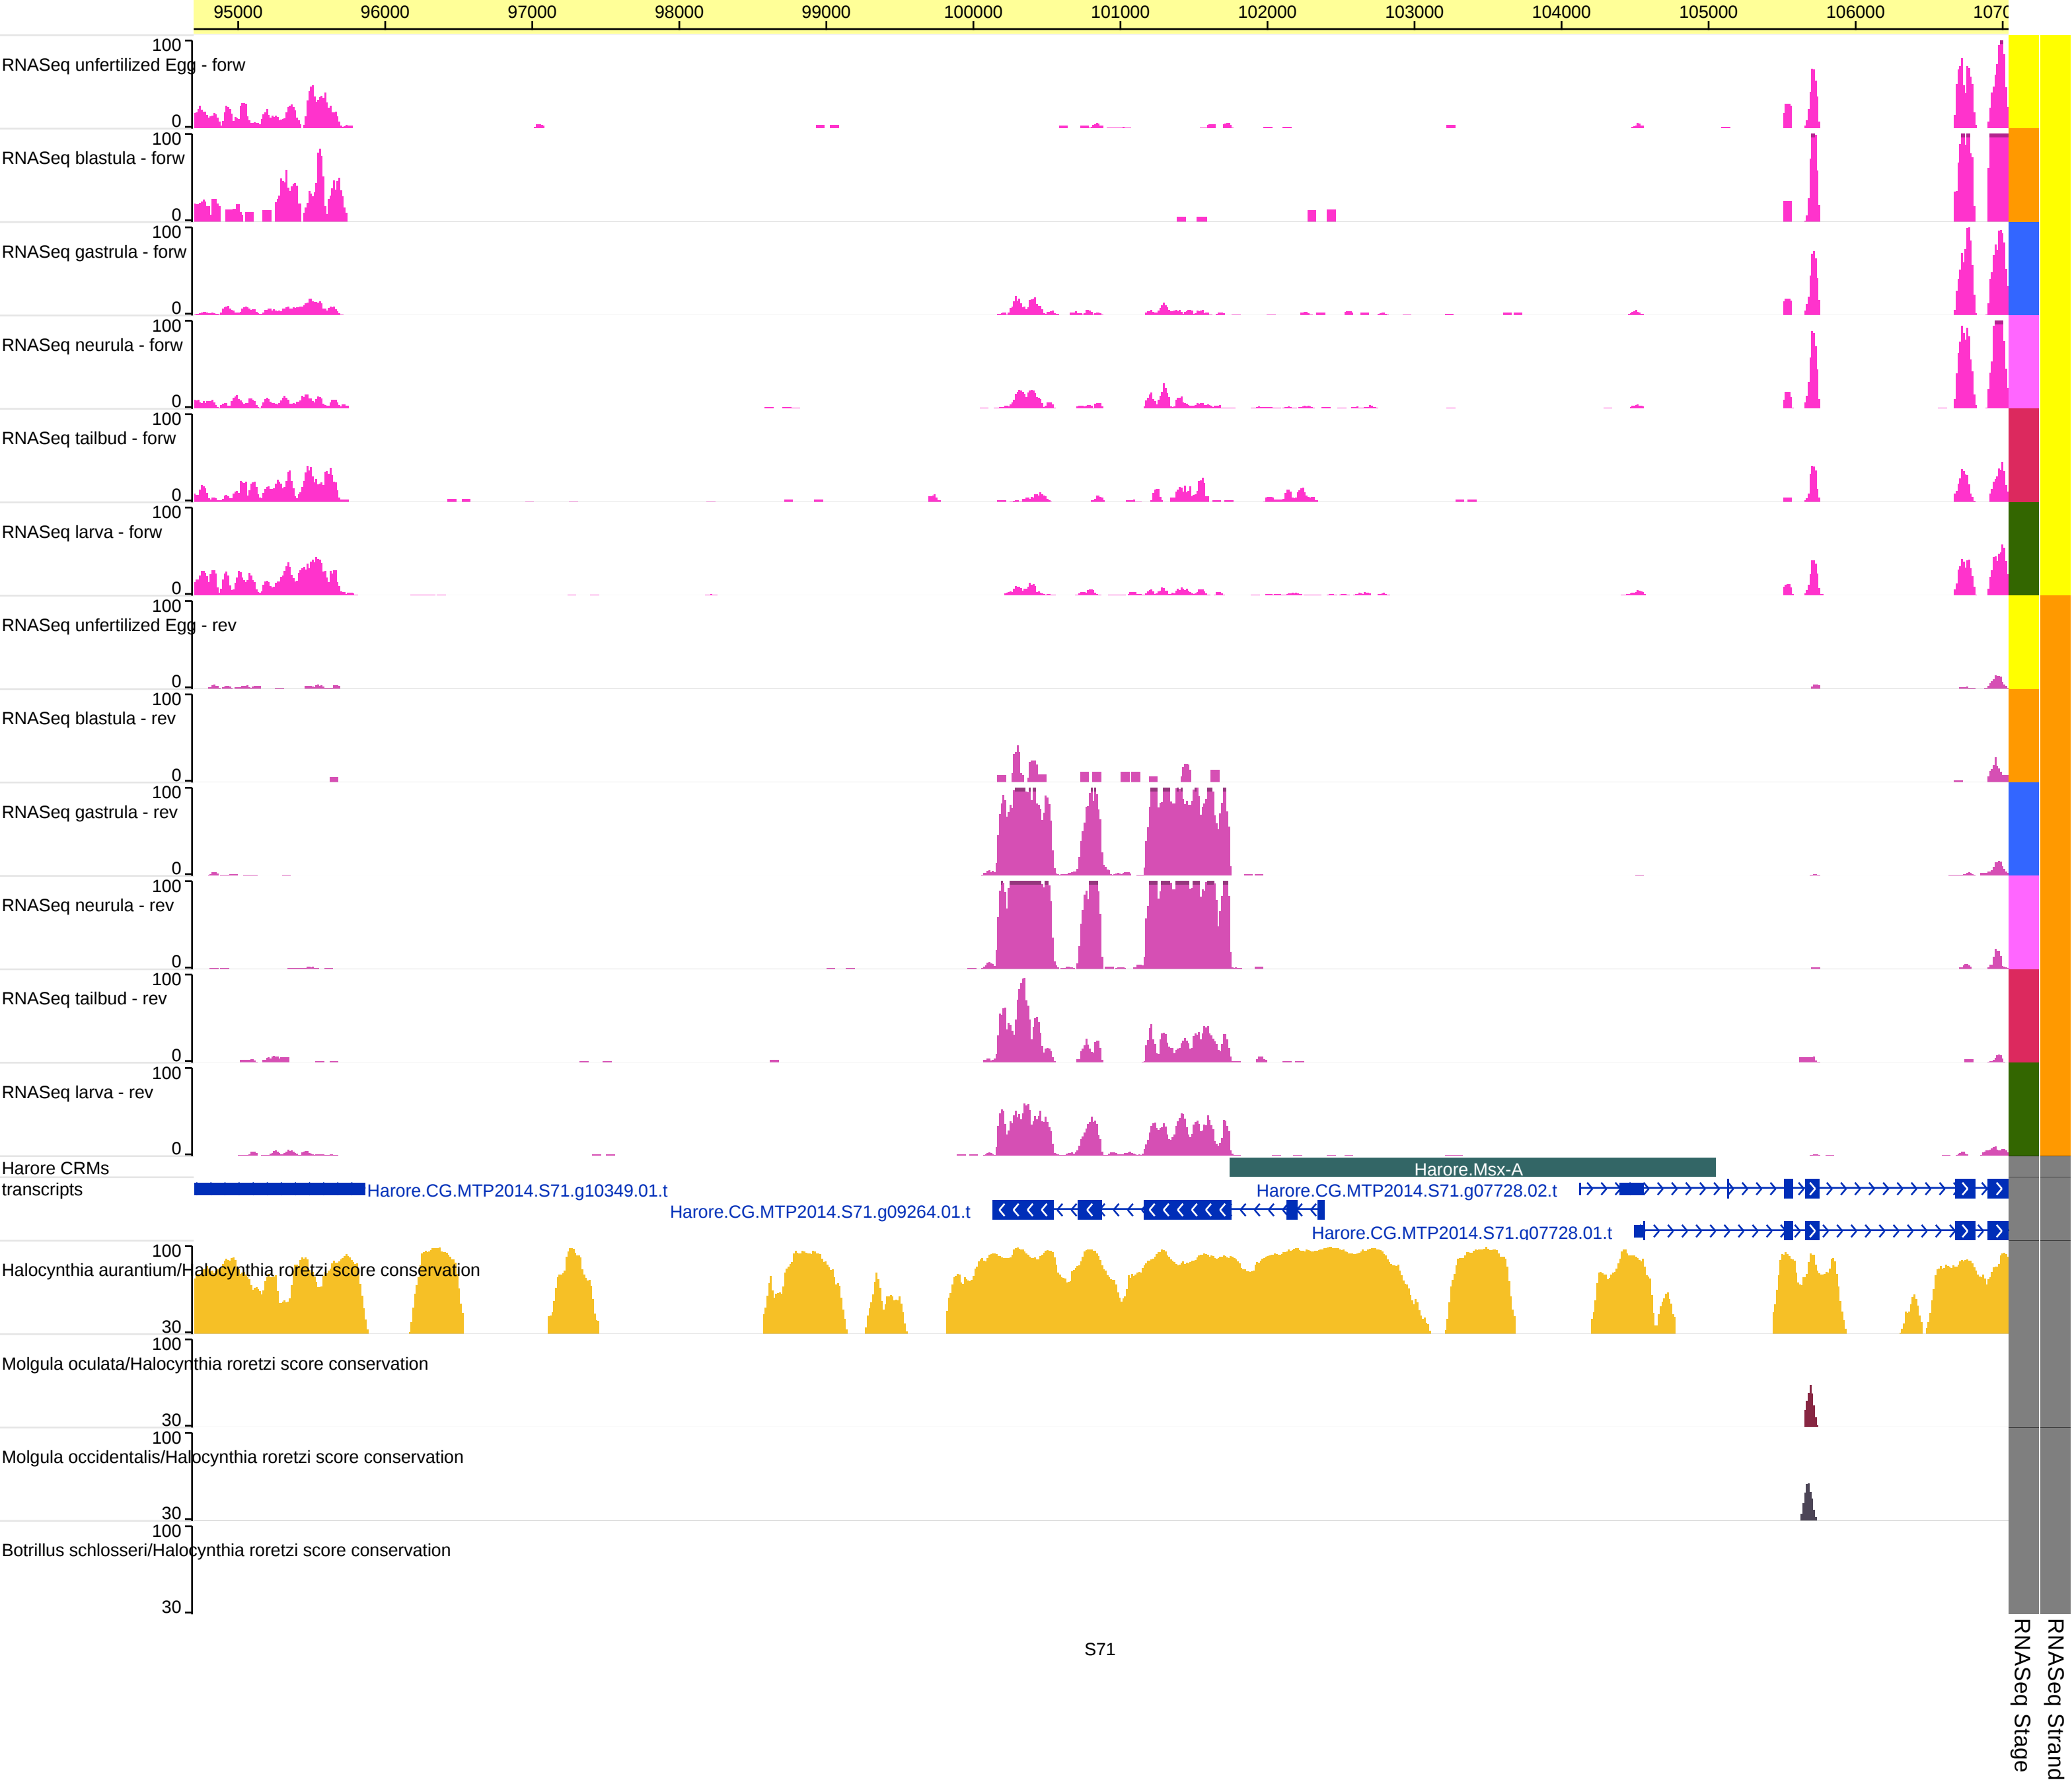

S71

RNA-seq Stage

RNA-seq Strand

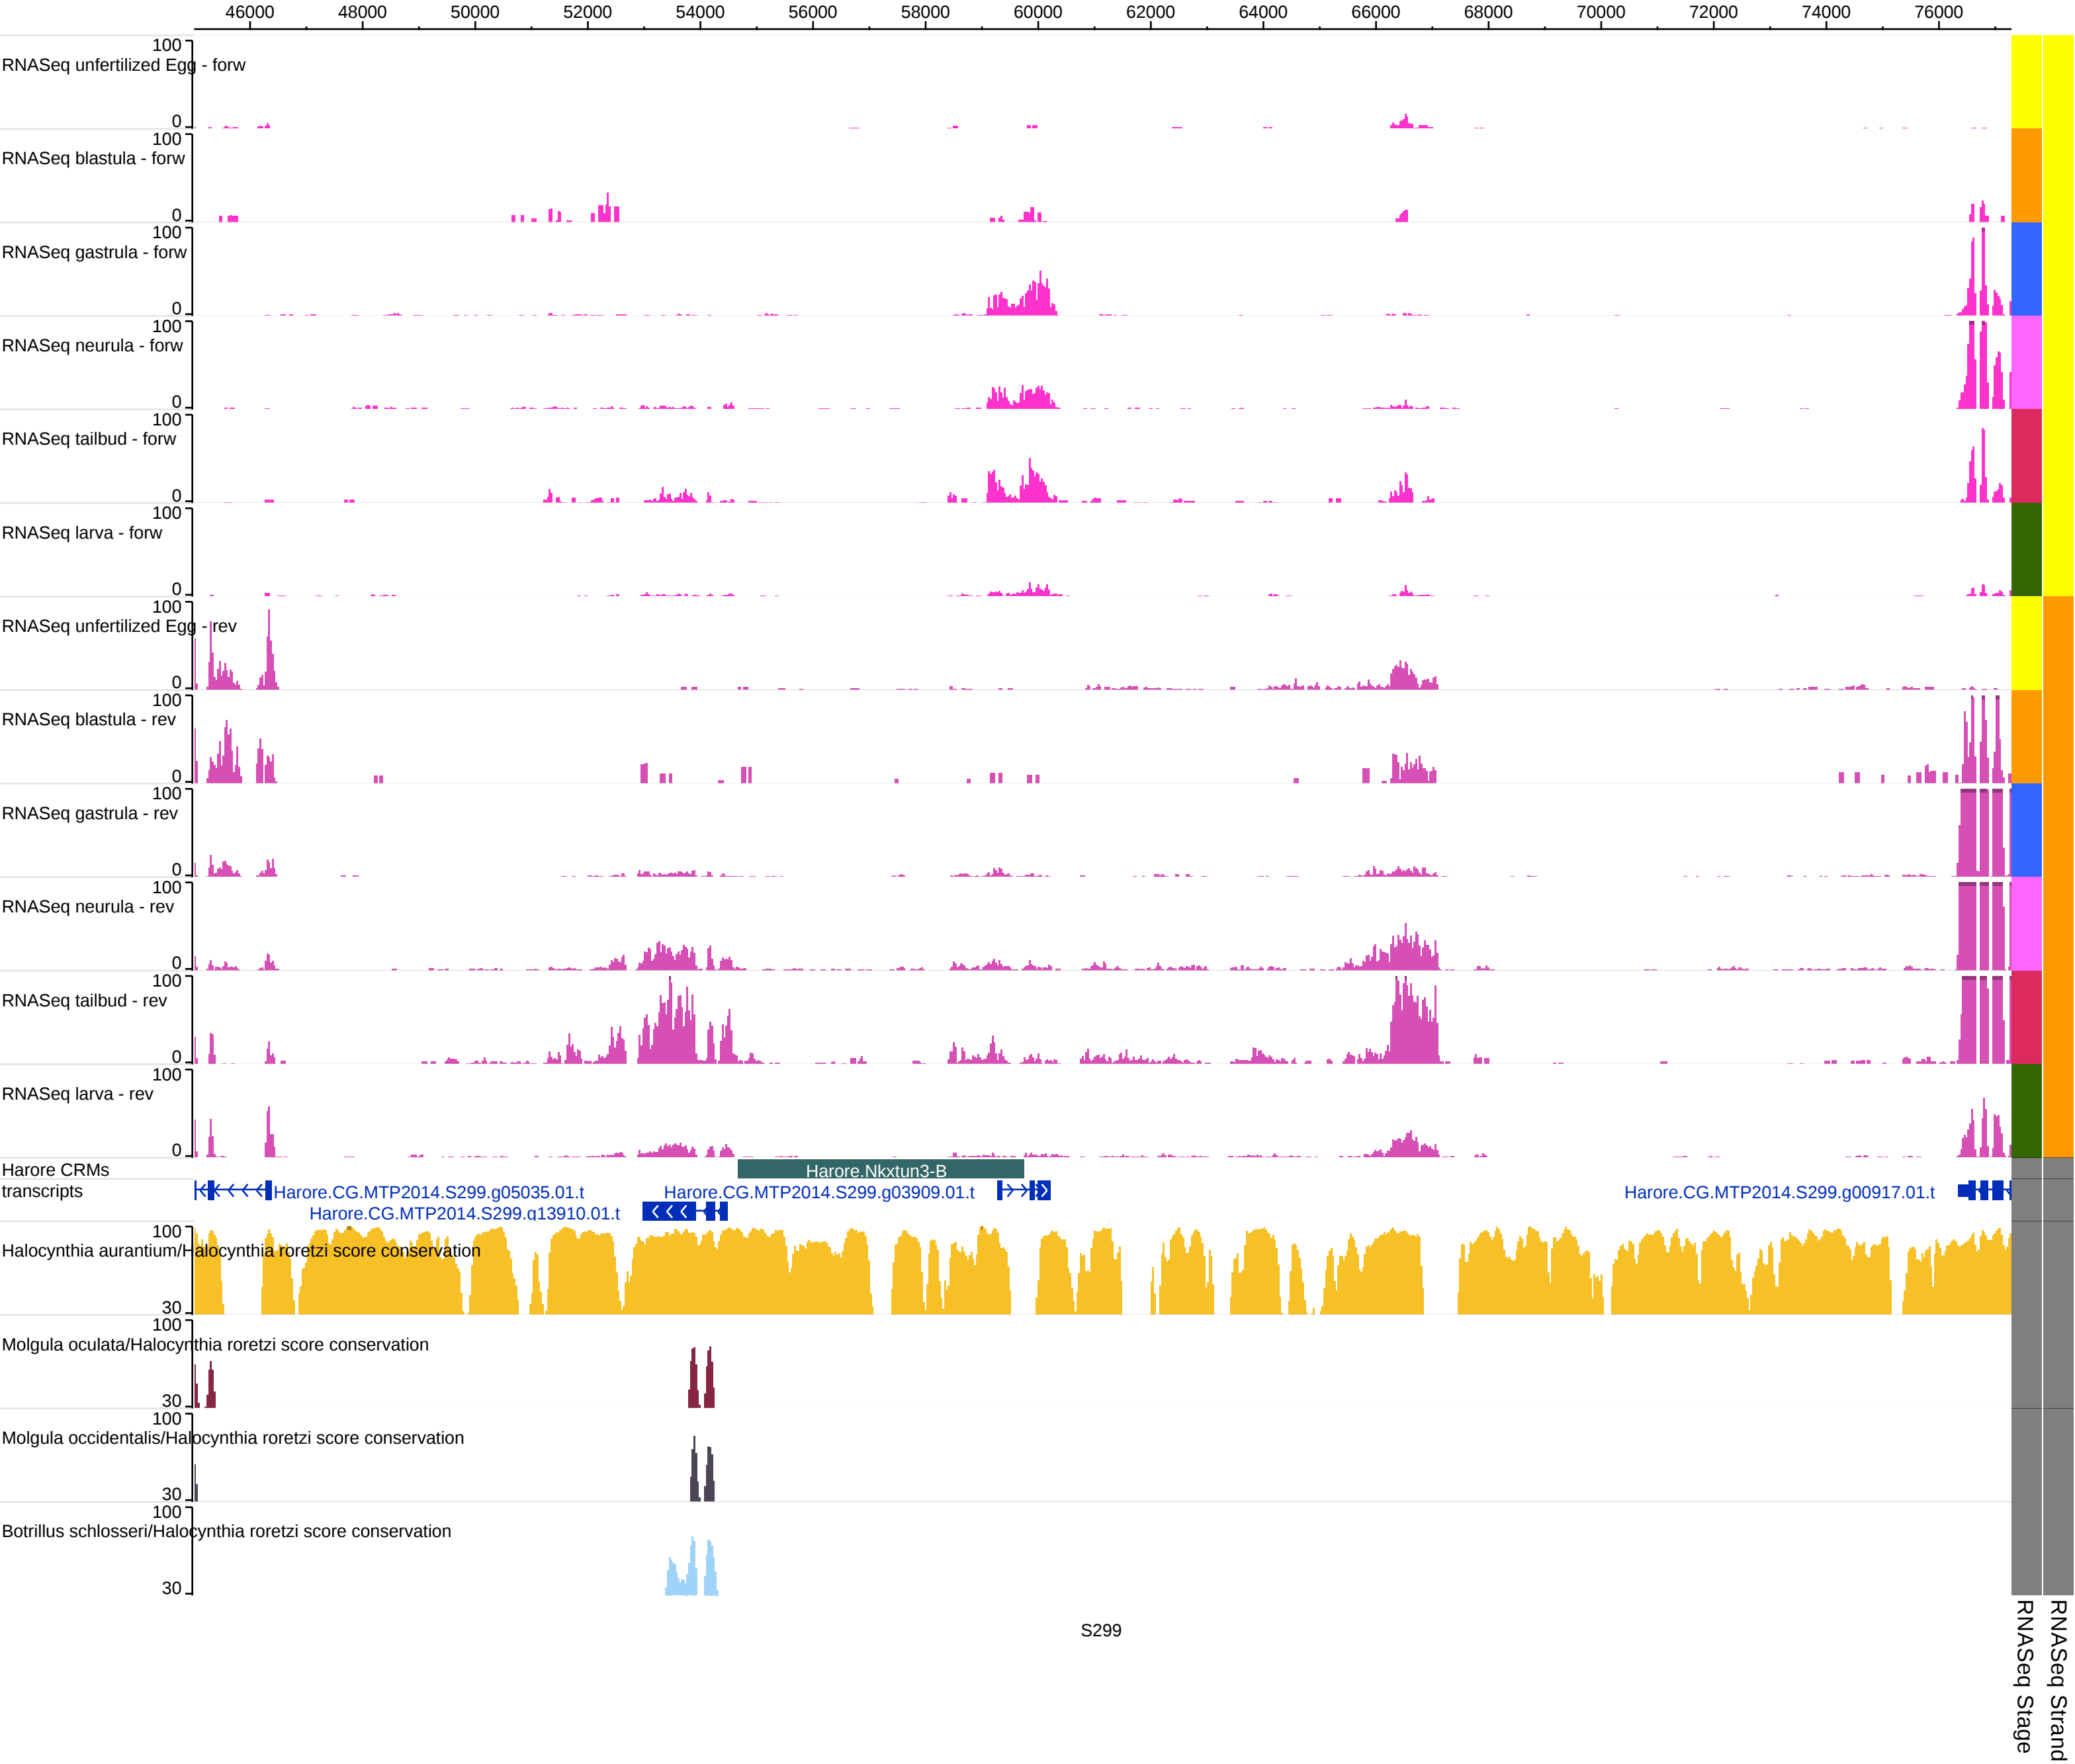

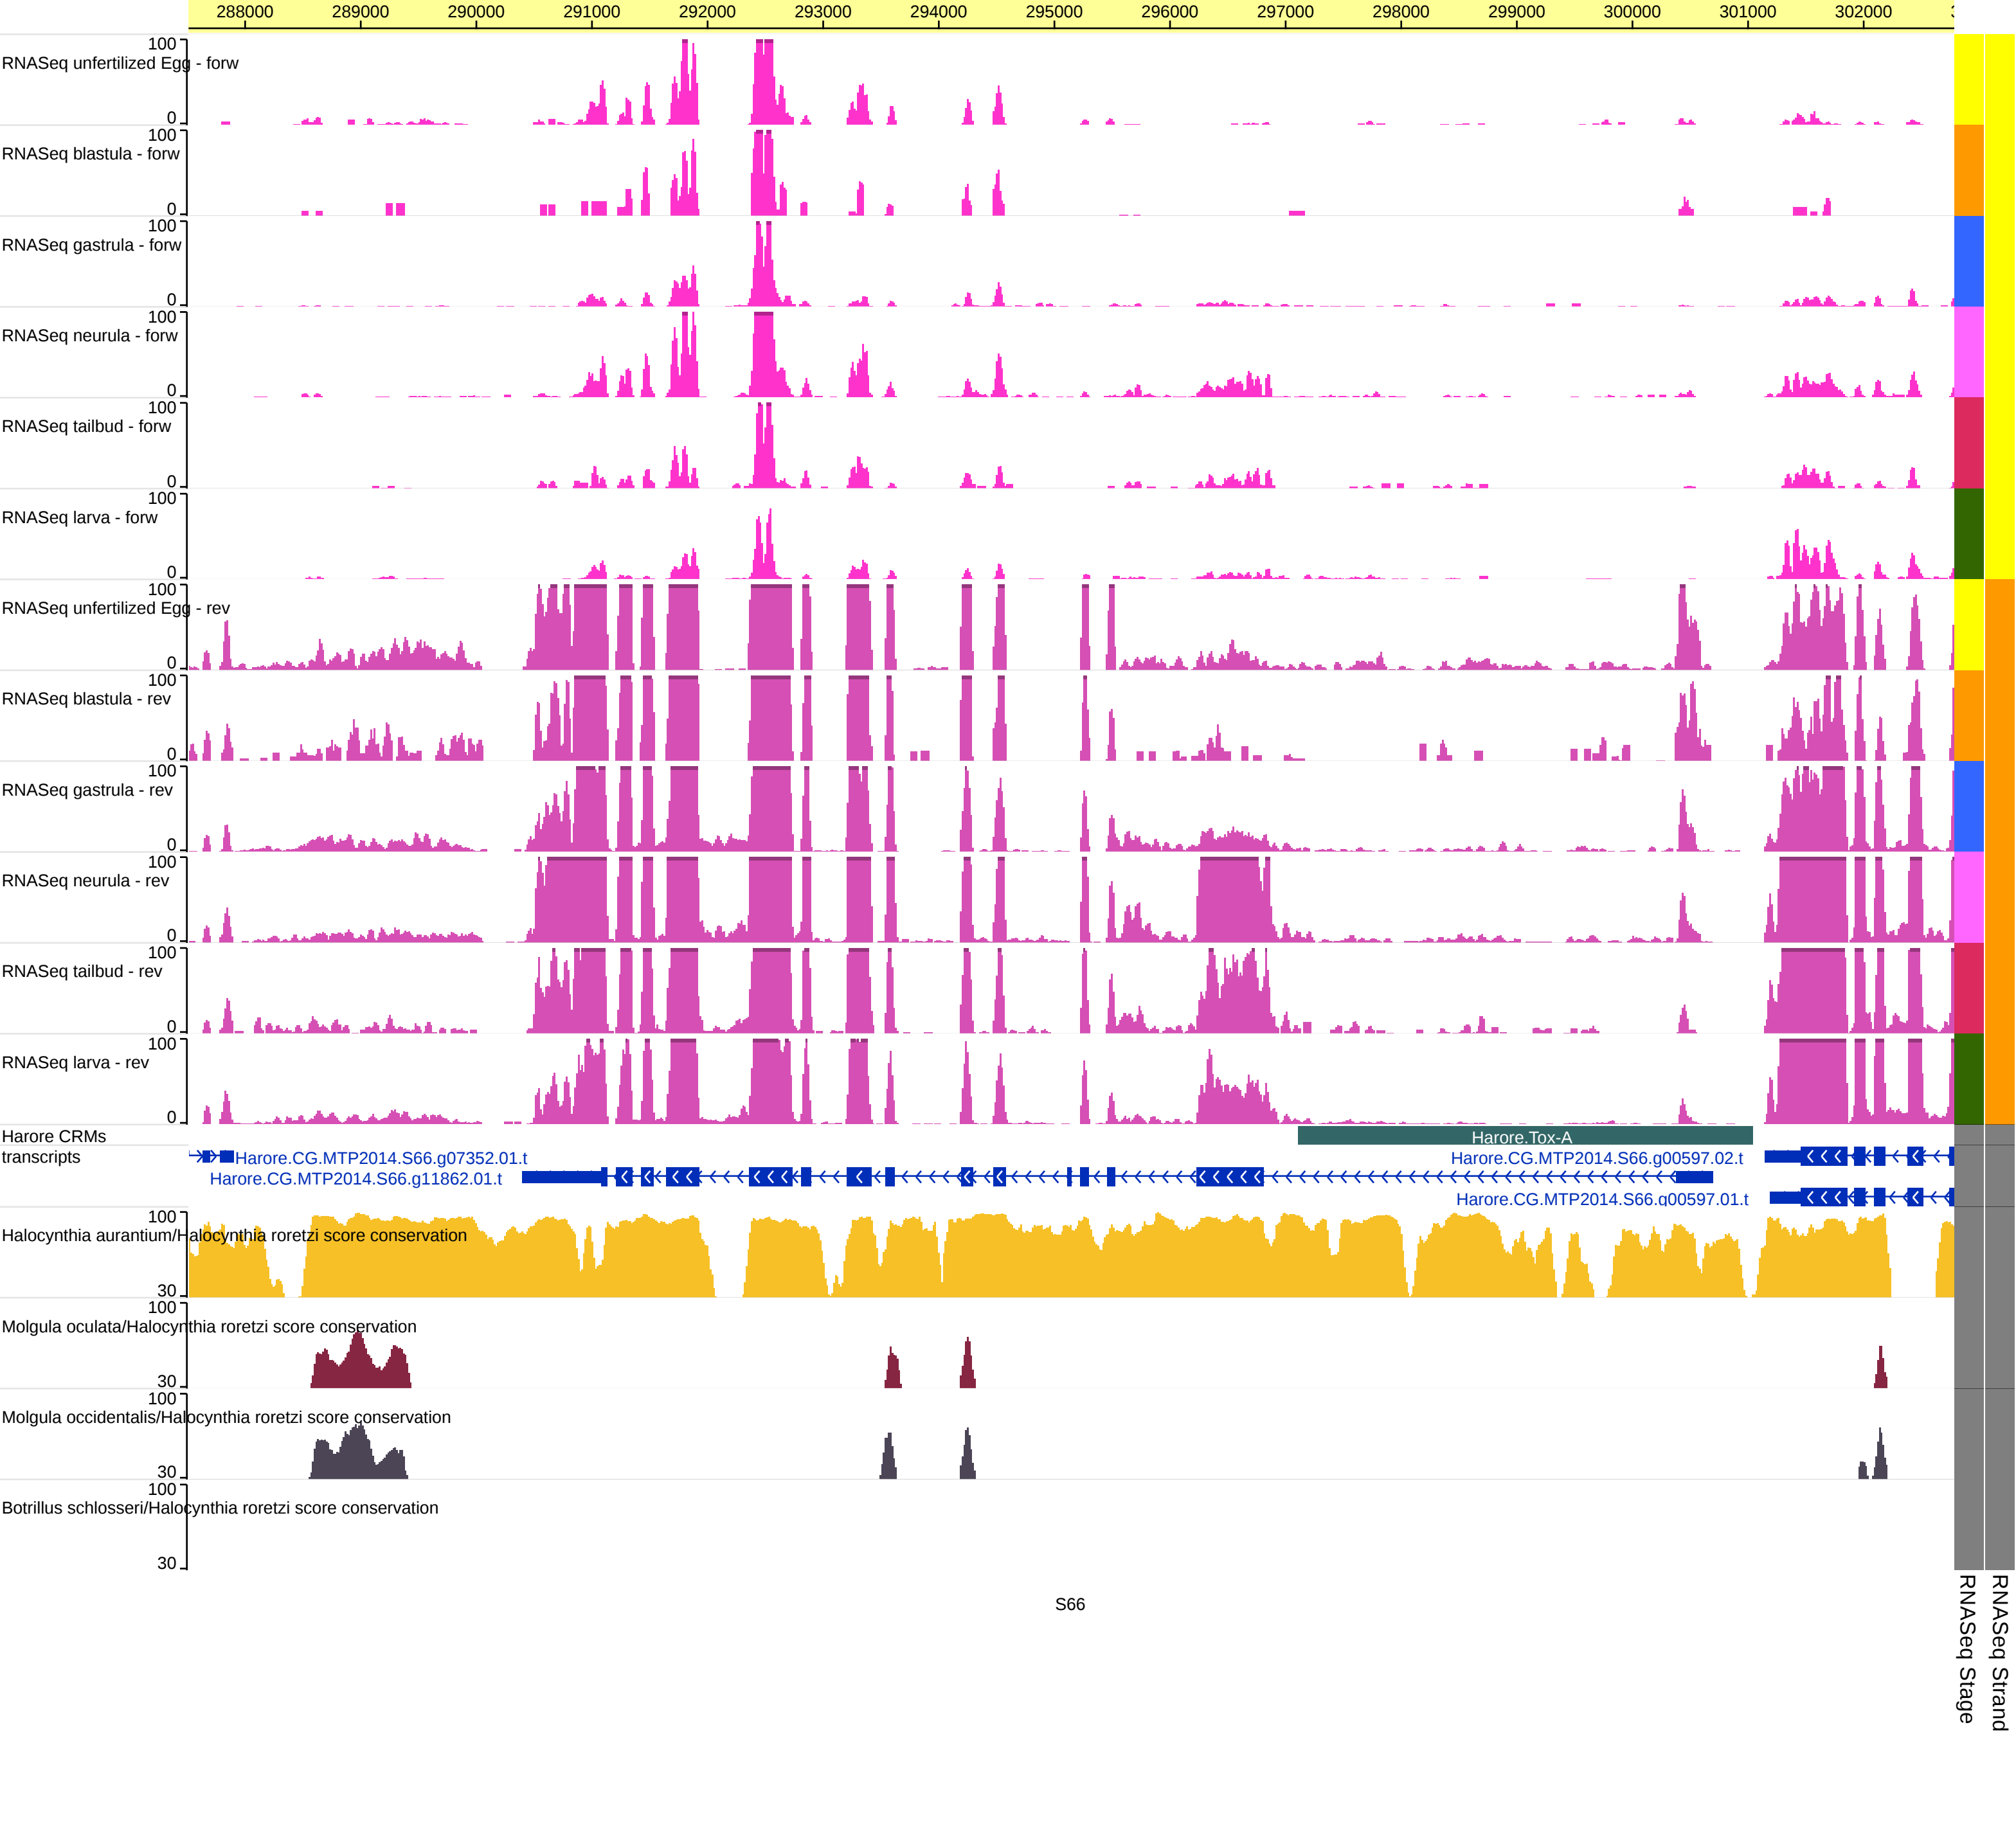

Supplement: supp [file elife-59157-supp-v1.zip › elife_poa_e59157_Supplementary_file_7.pdf]

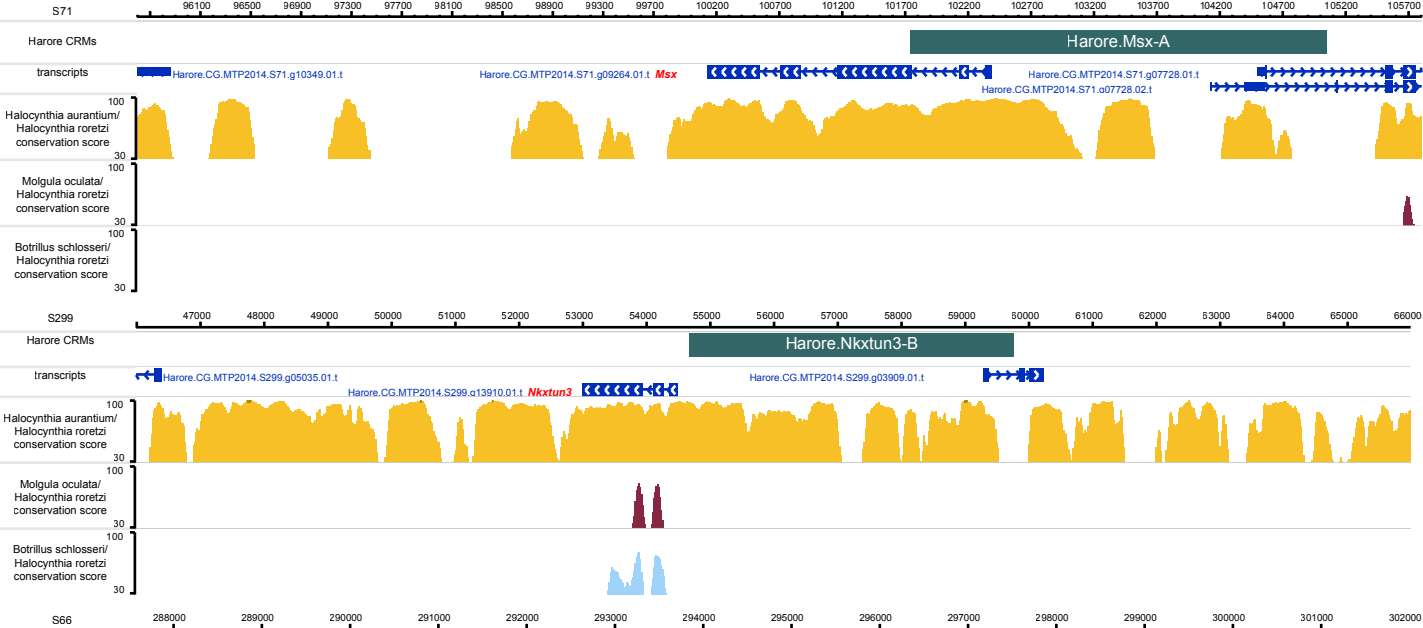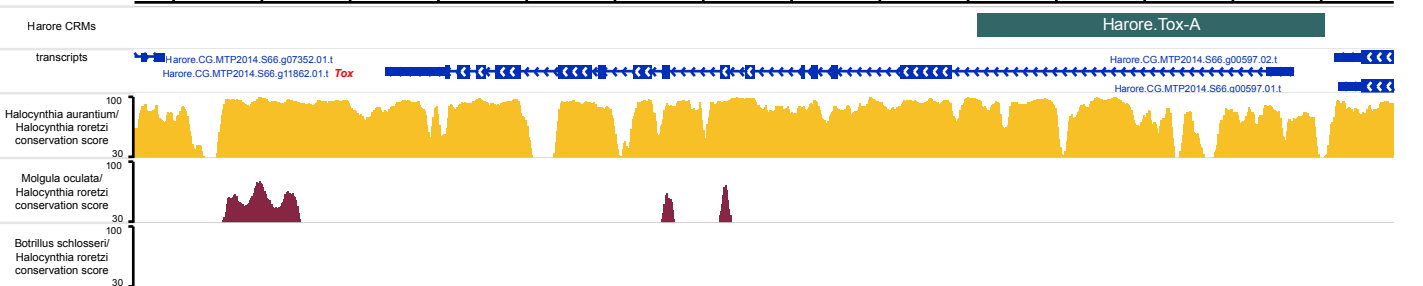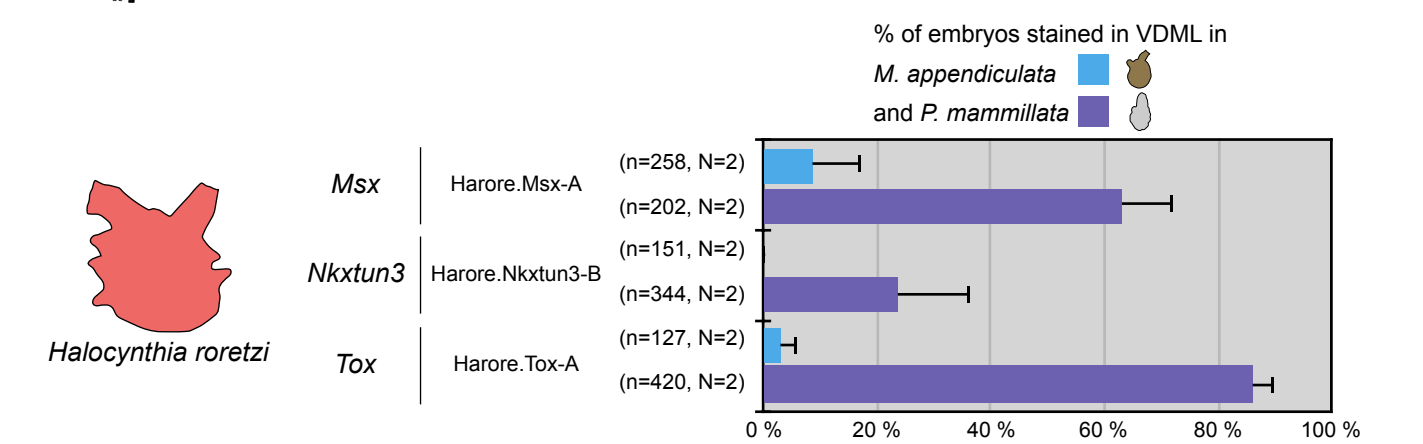

Supplement: supp [file elife_poa_e59157_Figure_9_figure_supplement_2.pdf › elife_poa_e59157_Figure_9_figure_supplement_2.pdf]
